# Supplementary material for: Electronic excited states of monobromosilylene molecules including the spin–orbit-coupling
Source: Royal Society of Chemistry journal article supplement (doi:10.1039/d3cp04970a), 2023-01-01
Supplement: d3cp04970a1.pdf [file d3cp04970a1.pdf]

## Supplementary Information

### Electronic excited states of monobromosilylene molecules including the spin-orbit-coupling

Lili Bian<sup>a</sup>, Shimin Shan<sup>b</sup>, Yi Lian<sup>a</sup>, Lidan Xiao<sup>a</sup>, Di Liu<sup>a</sup>, Hang Lv<sup>\*a</sup>, Haifeng Xu<sup>\*a</sup>, Bing Yan<sup>\*a</sup>

<sup>a</sup> Institute of Atomic and Molecular Physics, Jilin University, Changchun 130012, China

<sup>b</sup> School of Semiconductors and Physics, North University of China, Taiyuan, 030051, China

**Table S1. Equilibrium geometries of HSiBr as a function of different basis set**

|                                  | CC-PVTZ-f12 | CC-PVQZ-f12 | CBS(3, 4) |
|----------------------------------|-------------|-------------|-----------|
| Ground state( $X^1A'$ )          |             |             |           |
| $R_{Si-H}$ (Å)                   | 1.517       | 1.517       | 1.517     |
| $R_{Si-Br}$ (Å)                  | 2.243       | 2.244       | 2.244     |
| $\angle H-Si-Br$ (deg)           | 94.5        | 94.5        | 94.5      |
| First excited state( $A^1A''$ )  |             |             |           |
| $R_{Si-H}$ (Å)                   | 1.508       | 1.508       | 1.509     |
| $R_{Si-Br}$ (Å)                  | 2.213       | 2.214       | 2.215     |
| $\angle H-Si-Br$ (deg)           | 117.9       | 117.8       | 117.8     |
| Lowest triplet state( $a^3A''$ ) |             |             |           |
| $R_{Si-H}$ (Å)                   | 1.485       | 1.485       | 1.484     |
| $R_{Si-Br}$ (Å)                  | 2.209       | 2.210       | 2.210     |
| $\angle H-Si-Br$ (deg)           | 115.9       | 115.9       | 115.9     |

**Table S2. Equilibrium geometries of spin-coupled states as a function of different basis set**

|                               | CC-PVTZ-f12 | CC-PVQZ-f12 | CBS(3, 4) |
|-------------------------------|-------------|-------------|-----------|
| #1                            |             |             |           |
| $R_{\text{Si-H}} (\text{Å})$  | 1.516       | 1.516       | 1.516     |
| $R_{\text{Si-Br}} (\text{Å})$ | 2.244       | 2.245       | 2.245     |
| $\angle \text{H-Si-Br (deg)}$ | 94.5        | 94.5        | 94.5      |
| #2                            |             |             |           |
| $R_{\text{Si-H}} (\text{Å})$  | 1.486       | 1.485       | 1.485     |
| $R_{\text{Si-Br}} (\text{Å})$ | 2.210       | 2.210       | 2.211     |
| $\angle \text{H-Si-Br (deg)}$ | 116.2       | 116.0       | 115.9     |
| #3                            |             |             |           |
| $R_{\text{Si-H}} (\text{Å})$  | 1.486       | 1.485       | 1.485     |
| $R_{\text{Si-Br}} (\text{Å})$ | 2.210       | 2.210       | 2.211     |
| $\angle \text{H-Si-Br (deg)}$ | 116.2       | 116.0       | 115.9     |
| #4                            |             |             |           |
| $R_{\text{Si-H}} (\text{Å})$  | 1.485       | 1.485       | 1.485     |
| $R_{\text{Si-Br}} (\text{Å})$ | 2.210       | 2.210       | 2.210     |
| $\angle \text{H-Si-Br (deg)}$ | 116.1       | 116.1       | 116.0     |
| #5                            |             |             |           |
| $R_{\text{Si-H}} (\text{Å})$  | 1.509       | 1.509       | 1.509     |
| $R_{\text{Si-Br}} (\text{Å})$ | 2.215       | 2.215       | 2.215     |
| $\angle \text{H-Si-Br (deg)}$ | 117.6       | 117.6       | 117.6     |

**Table S3. Vertical transition energy and oscillator strength as a function of different basis set**

| state              | VTE <sup>3</sup> (eV) |             |       | oscillator strength   |                       |
|--------------------|-----------------------|-------------|-------|-----------------------|-----------------------|
|                    | CC-PVTZ-f12           | CC-PVQZ-f12 | CBS   | CC-PVTZ-f12           | CC-PVQZ-f12           |
| X <sup>1</sup> A'  | 0                     | 0           | 0     |                       | □                     |
| a <sup>3</sup> A'' | 1.498                 | 1.503       | 1.507 |                       | □                     |
| A <sup>1</sup> A'' | 2.500                 | 2.507       | 2.512 | 1.47×10 <sup>-2</sup> | 1.49×10 <sup>-2</sup> |
| 2 <sup>3</sup> A'' | 4.320                 | 4.348       | 4.368 |                       | □                     |
| 1 <sup>3</sup> A'  | 4.346                 | 4.353       | 4.358 |                       | □                     |
| 2 <sup>3</sup> A'  | 4.482                 | 4.516       | 4.541 |                       | □                     |
| 2 <sup>1</sup> A'' | 4.616                 | 4.643       | 4.663 | 9.17×10 <sup>-3</sup> | 9.21×10 <sup>-3</sup> |
| 2 <sup>1</sup> A'  | 4.938                 | 4.963       | 4.981 | 1.65×10 <sup>-2</sup> | 1.56×10 <sup>-2</sup> |
| 3 <sup>1</sup> A'  | 5.282                 | 5.285       | 5.287 | 8.67×10 <sup>-2</sup> | 8.82×10 <sup>-2</sup> |
| 3 <sup>3</sup> A'' | 5.370                 | 5.39        | 5.405 |                       | □                     |
| 3 <sup>1</sup> A'' | 5.628                 | 5.645       | 5.657 | 4.44×10 <sup>-5</sup> | 3.85×10 <sup>-5</sup> |
| 4 <sup>1</sup> A'  | 5.640                 | 5.648       | 5.654 | 6.21×10 <sup>-2</sup> | 6.41×10 <sup>-2</sup> |
| 3 <sup>3</sup> A'  | 6.625                 | 6.651       | 6.670 |                       | □                     |
| 4 <sup>3</sup> A'' | 6.932                 | 6.963       | 6.986 |                       | □                     |
| 5 <sup>3</sup> A'' | 6.978                 | 6.997       | 7.011 |                       | □                     |
| 4 <sup>3</sup> A'  | 7.020                 | 7.045       | 7.063 |                       | □                     |
| 4 <sup>1</sup> A'' | 7.155                 | 7.184       | 7.205 | 6.02×10 <sup>-3</sup> | 5.98×10 <sup>-3</sup> |
| 1 <sup>5</sup> A'' | 7.748                 | 7.78        | 7.803 |                       | □                     |
| 1 <sup>5</sup> A'  | 7.975                 | 8.01        | 8.036 |                       | □                     |
| 2 <sup>5</sup> A'' | 8.702                 | 8.728       | 8.747 |                       | □                     |

**Table S4. Vertical transition energy, oscillator strength, and composition of spin-orbit coupled states of HSiBr at the MRCI-F12/cc-pVQZ-F12 level**

| State | VTE <sup>a</sup> (eV) | Oscillator strength   | Compositions of states                                                                                                                                                                                                                                                                                           |
|-------|-----------------------|-----------------------|------------------------------------------------------------------------------------------------------------------------------------------------------------------------------------------------------------------------------------------------------------------------------------------------------------------|
| #1    | 0                     | 0                     | 99.91% 1 <sup>1</sup> A', 0.02% 3 <sup>3</sup> A', 0.04% 1 <sup>3</sup> A'', 0.04% 2 <sup>3</sup> A'', 0.01% 4 <sup>3</sup> A''                                                                                                                                                                                  |
| #2    | 1.500                 | 8.76×10 <sup>-8</sup> | 99.88% 1 <sup>3</sup> A'', 0.04% 2 <sup>3</sup> A', 0.03% 2 <sup>1</sup> A'', 0.01% 1 <sup>3</sup> A'                                                                                                                                                                                                            |
| #3    | 1.500                 | 7.70×10 <sup>-7</sup> | 99.90% 1 <sup>3</sup> A'', 0.04% 2 <sup>3</sup> A', 0.03% 2 <sup>3</sup> A''                                                                                                                                                                                                                                     |
| #4    | 1.500                 | 9.68×10 <sup>-6</sup> | 99.86% 1 <sup>3</sup> A'', 0.05% 2 <sup>3</sup> A'', 0.03% 1 <sup>1</sup> A', 0.03% 2 <sup>1</sup> A'                                                                                                                                                                                                            |
| #5    | 2.494                 | 1.48×10 <sup>-2</sup> | 99.69% 1 <sup>1</sup> A'', 0.16% 2 <sup>3</sup> A', 0.12% 2 <sup>3</sup> A'', 0.03% 1 <sup>3</sup> A', 0.01% 4 <sup>3</sup> A'                                                                                                                                                                                   |
| #6    | 4.266                 | 3.50×10 <sup>-7</sup> | 76.05% 2 <sup>3</sup> A'', 2.50% 1 <sup>3</sup> A', 21.30% 2 <sup>3</sup> A', 0.12% 3 <sup>3</sup> A'', 0.01% 1 <sup>3</sup> A''                                                                                                                                                                                 |
| #7    | 4.266                 | 3.65×10 <sup>-6</sup> | 75.52% 2 <sup>3</sup> A'', 2.81% 1 <sup>3</sup> A', 21.56% 2 <sup>3</sup> A', 0.08% 3 <sup>1</sup> A'', 0.01% 2 <sup>1</sup> A'', 0.01% 1 <sup>1</sup> A''                                                                                                                                                       |
| #8    | 4.316                 | 1.49×10 <sup>-3</sup> | 95.47% 2 <sup>3</sup> A'', 1.26% 1 <sup>3</sup> A', 0.68% 3 <sup>3</sup> A'', 0.04% 2 <sup>3</sup> A', 0.03% 1 <sup>3</sup> A'', 2.36% 2 <sup>1</sup> A', 0.07% 3 <sup>1</sup> A', 0.06% 4 <sup>1</sup> A', 0.02% 1 <sup>1</sup> A'                                                                              |
| #9    | 4.352                 | 1.10×10 <sup>-4</sup> | 96.68% 1 <sup>3</sup> A', 0.26% 2 <sup>3</sup> A'', 1.50% 2 <sup>3</sup> A', 0.07% 3 <sup>3</sup> A', 0.06% 4 <sup>3</sup> A'', 0.04% 3 <sup>3</sup> A'', 0.03% 1 <sup>5</sup> A'', 1.34% 2 <sup>1</sup> A'', 0.03% 2 <sup>5</sup> A''                                                                           |
| #10   | 4.357                 | 2.04×10 <sup>-9</sup> | 97.07% 1 <sup>3</sup> A', 1.36% 2 <sup>3</sup> A'', 1.24% 2 <sup>3</sup> A', 0.07% 3 <sup>3</sup> A', 0.02% 2 <sup>5</sup> A'', 0.05% 4 <sup>1</sup> A'', 0.15% 2 <sup>1</sup> A'', 0.02% 1 <sup>1</sup> A'', 0.02% 1 <sup>5</sup> A'', 0.01% 3 <sup>1</sup> A''                                                 |
| #11   | 4.358                 | 1.22×10 <sup>-5</sup> | 95.92% 1 <sup>3</sup> A', 0.90% 2 <sup>3</sup> A', 2.90% 2 <sup>3</sup> A'', 0.07% 4 <sup>3</sup> A'', 0.08% 3 <sup>3</sup> A'', 0.01% 1 <sup>1</sup> A', 0.02% 2 <sup>1</sup> A', 0.05% 3 <sup>1</sup> A', 0.02% 1 <sup>5</sup> A'', 0.01% 4 <sup>1</sup> A'                                                    |
| #12   | 4.427                 | 2.57×10 <sup>-3</sup> | 71.54% 2 <sup>3</sup> A', 25.61% 2 <sup>1</sup> A'', 2.65% 1 <sup>3</sup> A', 0.03% 1 <sup>1</sup> A'', 0.14% 3 <sup>3</sup> A'', 0.01% 3 <sup>3</sup> A', 0.02% 4 <sup>3</sup> A''                                                                                                                              |
| #13   | 4.559                 | 2.35×10 <sup>-6</sup> | 75.86% 2 <sup>3</sup> A', 10.98% 2 <sup>3</sup> A'', 3.02% 3 <sup>3</sup> A'', 0.08% 1 <sup>3</sup> A', 0.04% 1 <sup>3</sup> A', 0.01% 3 <sup>1</sup> A'                                                                                                                                                         |
| #14   | 4.567                 | 2.54×10 <sup>-5</sup> | 75.94% 2 <sup>3</sup> A', 21.82% 2 <sup>3</sup> A'', 0.19% 1 <sup>3</sup> A', 0.22% 1 <sup>1</sup> A'', 0.05% 2 <sup>1</sup> A'', 1.78% 3 <sup>1</sup> A''                                                                                                                                                       |
| #15   | 4.688                 | 6.38×10 <sup>-3</sup> | 70.40% 2 <sup>1</sup> A'', 24.99% 2 <sup>3</sup> A', 0.15% 1 <sup>3</sup> A', 0.01% 4 <sup>3</sup> A', 4.24% 3 <sup>3</sup> A'', 0.14% 2 <sup>3</sup> A'', 0.06% 1 <sup>3</sup> A''                                                                                                                              |
| #16   | 4.991                 | 1.68×10 <sup>-2</sup> | 91.77% 2 <sup>1</sup> A', 0.04% 3 <sup>3</sup> A', 0.02% 4 <sup>3</sup> A', 0.03% 1 <sup>3</sup> A'', 1.60% 2 <sup>3</sup> A'', 7.50% 3 <sup>3</sup> A'', 0.05% 4 <sup>3</sup> A''                                                                                                                               |
| #17   | 5.290                 | 7.04×10 <sup>-2</sup> | 97.47% 3 <sup>1</sup> A', 0.04% 1 <sup>3</sup> A', 0.04% 2 <sup>3</sup> A', 0.04% 4 <sup>3</sup> A', 0.1% 3 <sup>3</sup> A', 0.01% 5 <sup>3</sup> A', 1.92% 3 <sup>3</sup> A'', 0.02% 2 <sup>3</sup> A'', 0.25% 4 <sup>3</sup> A'', 0.01% 5 <sup>3</sup> A'', , 0.01% 1 <sup>3</sup> A'', 0.1% 2 <sup>1</sup> A' |
| #18   | 5.416                 | 2.78×10 <sup>-4</sup> | 96.39% 3 <sup>3</sup> A'', 0.35% 3 <sup>1</sup> A', 0.07% 2 <sup>1</sup> A', 1.30% 2 <sup>3</sup> A'', 1.80% 2 <sup>3</sup> A', 0.06% 1 <sup>3</sup> A'                                                                                                                                                          |
| #19   | 5.420                 | 1.97×10 <sup>-4</sup> | 95.32% 3 <sup>3</sup> A'', 1.95% 2 <sup>3</sup> A', 0.24% 3 <sup>1</sup> A'', 2.39% 2 <sup>1</sup> A'', 0.06% 1 <sup>3</sup> A', 0.01% 3 <sup>1</sup> A', 0.01% 1 <sup>1</sup> A''                                                                                                                               |
| #20   | 5.426                 | 1.01×10 <sup>-3</sup> | 88.46% 3 <sup>3</sup> A'', 0.02% 2 <sup>3</sup> A', 1.39% 2 <sup>3</sup> A'', 0.02% 3 <sup>3</sup> A', 6.47% 2 <sup>1</sup> A', 1.94% 4 <sup>1</sup> A', 1.65% 3 <sup>1</sup> A'                                                                                                                                 |
| #21   | 5.657                 | 2.74×10 <sup>-5</sup> | 97.84% 3 <sup>1</sup> A'', 1.09% 2 <sup>3</sup> A', 0.22% 3 <sup>3</sup> A'', 0.03% 4 <sup>3</sup> A', 0.01%                                                                                                                                                                                                     |

|     |       |                        |                                                                                                                                                                                                                                                                                         |
|-----|-------|------------------------|-----------------------------------------------------------------------------------------------------------------------------------------------------------------------------------------------------------------------------------------------------------------------------------------|
|     |       |                        | 3 <sup>3</sup> A',0.78% 2 <sup>3</sup> A'', 0.01% 2 <sup>1</sup> A''                                                                                                                                                                                                                    |
| #22 | 5.674 | 6.07×10 <sup>-2</sup>  | 97.53% 4 <sup>1</sup> A', 0.26% 4 <sup>3</sup> A', 0.03% 3 <sup>3</sup> A', 0.17% 2 <sup>3</sup> A'', 1.77% 3 <sup>3</sup> A'', 0.02% 1 <sup>3</sup> A', 0.08% 4 <sup>3</sup> A'', 0.08% 5 <sup>3</sup> A'', 0.01% 3 <sup>1</sup> A', 0.07% 2 <sup>1</sup> A'                           |
| #23 | 6.615 | 8.10×10 <sup>-7</sup>  | 87.92% 3 <sup>3</sup> A', 0.03% 1 <sup>3</sup> A', 11.62% 4 <sup>3</sup> A'', 0.38% 5 <sup>3</sup> A'', 0.04% 1 <sup>5</sup> A''                                                                                                                                                        |
| #24 | 6.615 | 5.17×10 <sup>-6</sup>  | 87.7% 3 <sup>3</sup> A', 11.78% 4 <sup>3</sup> A'', 0.39% 5 <sup>3</sup> A'', 0.02% 2 <sup>1</sup> A', 0.04% 3 <sup>1</sup> A', 0.04% 1 <sup>5</sup> A'', 0.01% 4 <sup>1</sup> A'                                                                                                       |
| #25 | 6.632 | 3.35×10 <sup>-4</sup>  | 94.28% 3 <sup>3</sup> A', 0.05% 1 <sup>3</sup> A', 4.57% 4 <sup>1</sup> A'', 0.06% 1 <sup>5</sup> A'', 0.01% 2 <sup>1</sup> A'', 0.01% 3 <sup>1</sup> A''                                                                                                                               |
| #26 | 6.974 | 5.61×10 <sup>-4</sup>  | 99.01% 4 <sup>3</sup> A'', 0.19% 5 <sup>3</sup> A'', 0.38% 4 <sup>3</sup> A', 0.06% 1 <sup>3</sup> A', 0.05% 1 <sup>5</sup> A'', 0.18% 3 <sup>1</sup> A', 0.10% 4 <sup>1</sup> A'                                                                                                       |
| #27 | 7.013 | 1.89×10 <sup>-6</sup>  | 80.24% 4 <sup>3</sup> A'', 5.58% 5 <sup>3</sup> A'', 4.27% 4 <sup>3</sup> A', 9.55% 3 <sup>3</sup> A', 0.10% 1 <sup>3</sup> A', 0.01% 2 <sup>3</sup> A', 0.06% 1 <sup>5</sup> A'', 0.16% 1 <sup>5</sup> A', 0.02% 2 <sup>5</sup> A''                                                    |
| #28 | 7.015 | 3.47×10 <sup>-5</sup>  | 81.94% 4 <sup>3</sup> A'', 6.65% 5 <sup>3</sup> A'', 1.12% 4 <sup>3</sup> A', 9.86% 3 <sup>3</sup> A', 0.02% 1 <sup>3</sup> A', 0.02% 1 <sup>5</sup> A'', 0.18% 1 <sup>5</sup> A', 0.1% 3 <sup>1</sup> A', 0.06% 2 <sup>1</sup> A', 0.01% 1 <sup>1</sup> A', 0.01% 2 <sup>5</sup> A''   |
| #29 | 7.047 | 6.32×10 <sup>-6</sup>  | 74.82% 4 <sup>3</sup> A', 19.60% 5 <sup>3</sup> A'', 4.08% 4 <sup>3</sup> A'', 0.07% 4 <sup>1</sup> A'', 0.15% 1 <sup>5</sup> A'', 0.16% 1 <sup>5</sup> A', 0.04% 2 <sup>5</sup> A'', 1.05% 3 <sup>3</sup> A', 0.01% 1 <sup>3</sup> A'                                                  |
| #30 | 7.050 | 1.07×10 <sup>-5</sup>  | 69.58% 4 <sup>3</sup> A', 10.87% 5 <sup>3</sup> A'', 1.99% 4 <sup>3</sup> A'', 1.12% 3 <sup>3</sup> A', 0.01% 1 <sup>1</sup> A', 0.02% 2 <sup>1</sup> A', 0.01% 3 <sup>1</sup> A', 0.07% 4 <sup>1</sup> A', 0.08% 1 <sup>5</sup> A'', 0.24% 1 <sup>5</sup> A', 0.04% 2 <sup>5</sup> A'' |
| #31 | 7.056 | 1.79×10 <sup>-5</sup>  | 96.48% 4 <sup>3</sup> A', 2.48% 4 <sup>3</sup> A'', 0.41% 3 <sup>3</sup> A', 0.45% 4 <sup>1</sup> A'', 0.04% 3 <sup>1</sup> A'', 0.09% 1 <sup>5</sup> A'', 0.01% 1 <sup>3</sup> A', 0.01% 1 <sup>1</sup> A''                                                                            |
| #32 | 7.069 | 9.49×10 <sup>-6</sup>  | 97.86% 5 <sup>3</sup> A'', 0.23% 4 <sup>3</sup> A'', 0.08% 4 <sup>3</sup> A', 0.1% 3 <sup>3</sup> A', 0.01% 3 <sup>1</sup> A', 0.01% 4 <sup>1</sup> A', 1.27% 1 <sup>5</sup> A', 0.44% 1 <sup>5</sup> A'', 0.12% 2 <sup>5</sup> A''                                                     |
| #33 | 7.082 | 3.08×10 <sup>-6</sup>  | 72.72% 5 <sup>3</sup> A'', 1.46% 4 <sup>3</sup> A'', 23.48% 4 <sup>3</sup> A', 0.99% 3 <sup>3</sup> A', 0.06% 4 <sup>1</sup> A'', 0.68% 1 <sup>5</sup> A', 0.51% 1 <sup>5</sup> A'', 0.1% 2 <sup>5</sup> A''                                                                            |
| #34 | 7.088 | 2.87×10 <sup>-5</sup>  | 66.82% 5 <sup>3</sup> A'', 2.17% 4 <sup>3</sup> A'', 28.42% 4 <sup>3</sup> A', 1.08% 3 <sup>3</sup> A', 0.26% 4 <sup>1</sup> A', 0.05% 3 <sup>1</sup> A', 0.7% 1 <sup>5</sup> A', 0.4% 1 <sup>5</sup> A'', 0.06% 2 <sup>5</sup> A''                                                     |
| #35 | 7.205 | 5.61×10 <sup>-3</sup>  | 93.78% 4 <sup>1</sup> A'', 5.49% 3 <sup>3</sup> A', 0.63% 4 <sup>3</sup> A', 0.07% 1 <sup>3</sup> A'                                                                                                                                                                                    |
| #36 | 7.705 | 5.60×10 <sup>-11</sup> | 81.88% 1 <sup>5</sup> A'', 17.84% 1 <sup>5</sup> A', 0.11% 2 <sup>5</sup> A'', 0.05% 4 <sup>3</sup> A', 0.12% 5 <sup>3</sup> A''                                                                                                                                                        |
| #37 | 7.705 | 1.63×10 <sup>-8</sup>  | 81.66% 1 <sup>5</sup> A'', 18.06% 1 <sup>5</sup> A', 0.14% 2 <sup>5</sup> A'', 0.06% 4 <sup>3</sup> A', 0.14% 5 <sup>3</sup> A''                                                                                                                                                        |
| #38 | 7.742 | 1.61×10 <sup>-8</sup>  | 93.1% 1 <sup>5</sup> A'', 5.6% 1 <sup>5</sup> A', 1.07% 2 <sup>5</sup> A'', 0.02% 4 <sup>3</sup> A'', 0.09% 4 <sup>3</sup> A', 0.18% 3 <sup>3</sup> A', 0.03% 1 <sup>3</sup> A',                                                                                                        |
| #39 | 7.748 | 2.54×10 <sup>-8</sup>  | 90.94% 1 <sup>5</sup> A'', 5.38% 1 <sup>5</sup> A', 0.6% 2 <sup>5</sup> A'', 0.29% 5 <sup>3</sup> A'', 0.04% 4 <sup>3</sup> A', 0.04% 3 <sup>3</sup> A', 0.02% 1 <sup>3</sup> A'                                                                                                        |
| #40 | 7.761 | 1.02×10 <sup>-7</sup>  | 98.15% 1 <sup>5</sup> A'', 0.42% 1 <sup>5</sup> A', 1.1% 2 <sup>5</sup> A'', 0.16% 5 <sup>3</sup> A'', 0.07% 3 <sup>3</sup> A', 0.06% 4 <sup>3</sup> A', 0.02% 1 <sup>3</sup> A',                                                                                                       |
| #41 | 7.988 | 7.97×10 <sup>-11</sup> | 95.93% 1 <sup>5</sup> A', 0.7% 1 <sup>5</sup> A'', 2.66% 2 <sup>5</sup> A'', 0.04% 4 <sup>3</sup> A'', 0.67% 5 <sup>3</sup> A''                                                                                                                                                         |
| #42 | 7.996 | 4.25×10 <sup>-10</sup> | 90.84% 1 <sup>5</sup> A', 5.36% 1 <sup>5</sup> A'', 3.32% 2 <sup>5</sup> A'', 0.02% 4 <sup>3</sup> A'', 0.42%                                                                                                                                                                           |

|     |       |                        |                                                                                                                                                                                    |
|-----|-------|------------------------|------------------------------------------------------------------------------------------------------------------------------------------------------------------------------------|
|     |       |                        | 5 <sup>3</sup> A''                                                                                                                                                                 |
| #43 | 8.025 | 1.14×10 <sup>-8</sup>  | 90.2% 1 <sup>5</sup> A', 8.16% 1 <sup>5</sup> A'', 0.4% 2 <sup>5</sup> A'', 0.04% 4 <sup>3</sup> A'', 1.16% 5 <sup>3</sup> A'', 0.01% 1 <sup>3</sup> A'', 0.01% 3 <sup>3</sup> A'' |
| #44 | 8.059 | 1.53×10 <sup>-9</sup>  | 80.64% 1 <sup>5</sup> A', 17.42% 1 <sup>5</sup> A'', 1.19% 2 <sup>5</sup> A'', 0.03% 4 <sup>3</sup> A'', 0.7% 5 <sup>3</sup> A'', 0.02% 1 <sup>3</sup> A''                         |
| #45 | 8.062 | 3.31×10 <sup>-8</sup>  | 81.83% 1 <sup>5</sup> A', 16.66% 1 <sup>5</sup> A'', 0.62% 2 <sup>5</sup> A'', 0.85% 5 <sup>3</sup> A'', 0.03% 1 <sup>3</sup> A''                                                  |
| #46 | 8.727 | 4.29×10 <sup>-9</sup>  | 99.04% 2 <sup>5</sup> A'', 0.6% 1 <sup>5</sup> A'', 0.2% 1 <sup>5</sup> A', 0.12% 5 <sup>3</sup> A'', 0.02% 1 <sup>3</sup> A'                                                      |
| #47 | 8.727 | 3.81×10 <sup>-9</sup>  | 98.86% 2 <sup>5</sup> A'', 0.6% 1 <sup>5</sup> A'', 0.2% 1 <sup>5</sup> A', 0.12% 5 <sup>3</sup> A'', 0.02% 1 <sup>3</sup> A'                                                      |
| #48 | 8.737 | 1.47×10 <sup>-9</sup>  | 97.58% 2 <sup>5</sup> A'', 1.53% 1 <sup>5</sup> A'', 0.86% 1 <sup>5</sup> A', 0.01% 3 <sup>3</sup> A', 0.01% 1 <sup>3</sup> A'                                                     |
| #49 | 8.743 | 3.53×10 <sup>-10</sup> | 96.52% 2 <sup>5</sup> A'', 0.48% 1 <sup>5</sup> A'', 2.78% 1 <sup>5</sup> A', 0.19% 5 <sup>3</sup> A'', 0.01% 4 <sup>3</sup> A''                                                   |
| #50 | 8.745 | 8.77×10 <sup>-11</sup> | 96.38% 2 <sup>5</sup> A'', 0.93% 1 <sup>5</sup> A'', 2.58% 1 <sup>5</sup> A', 0.12% 5 <sup>3</sup> A''                                                                             |

<sup>a</sup>The zero-point energy of the ground state was considered in the values of VTE. The unit of VTE is eV

**Table S5. Transition dipole moments (TDMs) corresponding to 50 states at the equilibrium geometries after considering soc effects**

| State | TDM(a.u.) | State | TDM(a.u.)         |
|-------|-----------|-------|-------------------|
| #1    |           | #26   | 0.056             |
| #2    | 0.001     | #27   | 0.003             |
| #3    | 0.005     | #28   | 0.014             |
| #4    | 0.015     | #29   | 0.006             |
| #5    | 0.473     | #30   | 0.008             |
| #6    | 0.002     | #31   | 0.010             |
| #7    | 0.006     | #32   | 0.007             |
| #8    | 0.116     | #33   | 0.004             |
| #9    | 0.031     | #34   | 0.013             |
| #10   | 0.000     | #35   | 0.176             |
| #11   | 0.010     | #36   | <10 <sup>-4</sup> |
| #12   | 0.151     | #37   | <10 <sup>-3</sup> |
| #13   | 0.005     | #38   | <10 <sup>-3</sup> |
| #14   | 0.015     | #39   | <10 <sup>-3</sup> |
| #15   | 0.231     | #40   | <10 <sup>-3</sup> |
| #16   | 0.363     | #41   | <10 <sup>-4</sup> |
| #17   | 0.724     | #42   | <10 <sup>-4</sup> |
| #18   | 0.045     | #43   | <10 <sup>-3</sup> |
| #19   | 0.038     | #44   | <10 <sup>-4</sup> |
| #20   | 0.085     | #45   | <10 <sup>-3</sup> |
| #21   | 0.014     | #46   | <10 <sup>-3</sup> |
| #22   | 0.649     | #47   | <10 <sup>-3</sup> |
| #23   | 0.002     | #48   | <10 <sup>-4</sup> |
| #24   | 0.006     | #49   | <10 <sup>-4</sup> |
| #25   | 0.045     | #50   | <10 <sup>-4</sup> |

**Table S6. The adiabatic dissociation channels and the corresponding dissociation energies (eV), electronic states (Corresponds to the Fig. 1 in the main text to provide accurate values)**

| Dissociation channel                   | Energy of dissociation limit (eV) | Electronic states                                                                               |
|----------------------------------------|-----------------------------------|-------------------------------------------------------------------------------------------------|
| "H+ SiBr"                              |                                   |                                                                                                 |
| H ( $^2S_g$ ) + SiBr ( $X^2\Pi$ )      | 3.35                              | $1^1A', 1^1A'', 1^3A', 1^3A''$                                                                  |
| H ( $^2S_g$ ) + SiBr ( $a^4\Sigma^-$ ) | 6.23                              | $2^3A'', 1^5A''$                                                                                |
| H ( $^2S_g$ ) + SiBr ( $B^2\Sigma^+$ ) | 6.32                              | $2^1A', 2^3A'$                                                                                  |
| H ( $^2S_g$ ) + SiBr ( $A^2\Delta$ )   | 7.54                              | $3^3A', 3^3A'', 3^1A', 2^1A''$ ,                                                                |
| H ( $^2S_g$ ) + SiBr ( $b^4\Pi$ )      | 7.91                              | $4^3A', 4^3A'', 1^5A', 2^5A''$ ,                                                                |
| H ( $^2S_g$ ) + SiBr ( $C^2\Sigma^-$ ) | 8.05                              | $3^1A'', 5^3A''$                                                                                |
| H ( $^2S_g$ ) + SiBr ( $D^2\Pi$ )      | 8.21                              | $4^1A', 4^1A''$                                                                                 |
| "SiH + Br"                             |                                   |                                                                                                 |
| HSi ( $X^2\Pi$ ) + Br ( $^2P_u$ )      | 3.97                              | $1^1A', 1^1A'', 2^1A', 2^1A'', 3^1A', 3^1A'', 1^3A',$<br>$1^3A'', 2^3A', 2^3A'', 3^3A', 3^3A''$ |
| HSi ( $a^4\Sigma^-$ ) + Br ( $^2P_u$ ) | 5.70                              | $4^3A', 4^3A'', 5^3A'', 1^5A', 1^5A'', 2^5A''$                                                  |
| HSi ( $A^2\Delta$ ) + Br ( $^2P_u$ )   | 6.96                              | $4^1A', 4^1A''$                                                                                 |

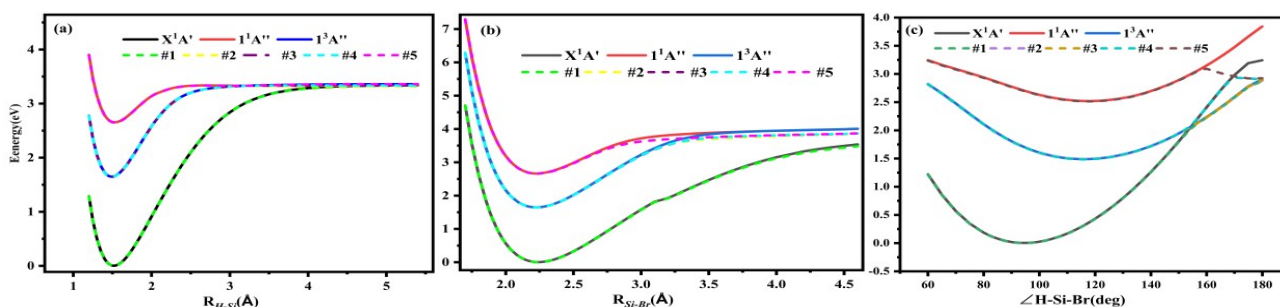

**Fig. S1** PECs of HSiBr at the MRCI-F12/cc-pVQZ-F12 level for the lowest three states considering SOC effect (dashed line) and not considering SOC (solid line) effect: (a) along the H-Si bond length; (b) along the Si-Br bond length; (c) along the H-Si-Br bond angle; the other both geometric constants are fixed at the respective equilibrium values of the ground state.

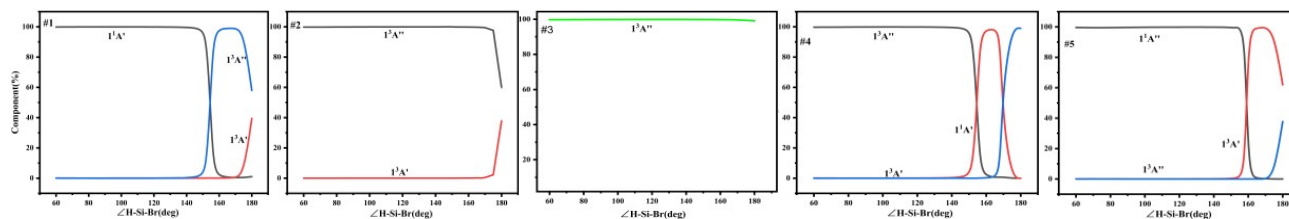

**Fig. S2** The spin-free components of the spin-coupled states #1–5: along the H–Si–Br bond angle. For each row, the other geometric constants are fixed at their respective equilibrium values of the ground state.
