# Supplementary material for: Electronic excited states of monobromosilylene molecules including the spin–orbit-coupling
Source: Royal Society of Chemistry journal article supplement (doi:10.1039/d3cp04970a), 2023-01-01
Supplement: d3cp04970a2.xlsx [file d3cp04970a2.xlsx]

## Sheet: Sheet1
PECs of the spin-free states along the H-Si bond length Corresponding data
RSS	E111	E211	E311	E411	E112	E212	E312	E412	E131	E231	E331	E431	E132	E232	E332	E432	E532	E151	E152	E252
1.16	1.74751	6.92203	7.18761	7.5566	4.41151	6.6042	7.91253	9.09023	6.0791	6.46842	8.12697	8.66422	3.27979	6.41998	7.6815	8.89404	8.86123	9.70684	9.56997	10.7082
1.21	1.17934	6.36202	6.63985	7.00285	3.85885	6.03521	7.32013	8.53022	5.53137	5.90079	7.87979	8.26441	2.74046	5.84201	7.08748	8.35471	8.3	9.17704	9.03118	10.1545
1.26	0.75593	5.94541	6.23304	6.59196	3.44768	5.6099	6.86516	8.11335	5.13361	5.47711	7.41964	7.80382	2.34426	5.40636	6.63087	7.95715	7.88189	8.79064	8.63499	9.73923
1.28	0.62042	5.81235	6.10351	6.46107	3.31625	5.47357	6.71522	7.98028	5.00783	5.34132	7.26168	7.65125	2.21963	5.26567	6.48039	7.83116	7.7486	8.67009	8.50981	9.60562
1.3	0.50232	5.69643	5.99031	6.34733	3.20169	5.35411	6.58134	7.86436	4.89914	5.22295	7.11608	7.51614	2.11215	5.14159	6.34597	7.72205	7.63439	8.56614	8.40151	9.48779
1.32	0.39974	5.59629	5.89235	6.24855	3.1021	5.25044	6.46216	7.76368	4.80562	5.11982	6.98073	7.39722	2.0199	5.03274	6.22624	7.62817	7.54428	8.47798	8.30845	9.38493
1.34	0.31157	5.51003	5.80827	6.16419	3.01638	5.16118	6.35603	7.67769	4.72614	5.03138	6.85459	7.2938	1.9418	4.93805	6.11957	7.54844	7.477	8.40396	8.22954	9.29541
1.36	0.23674	5.43711	5.73643	6.0929	2.94345	5.08499	6.26188	7.60449	4.65959	4.95574	6.7368	7.20491	1.87704	4.85641	6.02487	7.48122	7.41509	8.34301	8.16314	9.21785
1.38	0.17415	5.37588	5.67629	6.03331	2.88196	5.02077	6.17889	7.54354	4.60485	4.89261	6.62666	7.12944	1.82398	4.78621	5.94106	7.42571	7.36159	8.29403	8.10872	9.15119
1.4	0.12245	5.32581	5.6265	5.9846	2.83107	4.96744	6.10596	7.49347	4.56052	4.84009	6.52326	7.06586	1.7818	4.72662	5.86732	7.38081	7.31754	8.25593	8.06464	9.09486
1.42	0.08109	5.28581	5.5865	5.94569	2.78944	4.92444	6.04201	7.45347	4.52602	4.79791	6.42653	7.01343	1.74969	4.67682	5.80255	7.34571	7.28297	8.2279	8.03035	9.04724
1.44	0.04925	5.25506	5.55466	5.91575	2.75651	4.8907	5.98623	7.42299	4.50048	4.76498	6.33614	6.97112	1.72656	4.63573	5.74596	7.31932	7.25722	8.20886	8.00477	9.00778
1.46	0.02585	5.23275	5.53099	5.89426	2.73148	4.86539	5.93807	7.40068	4.48276	4.74049	6.25143	6.93767	1.7116	4.6028	5.69697	7.30081	7.23924	8.19824	7.98708	8.97567
1.48	0.01034	5.21778	5.51411	5.88011	2.71352	4.84771	5.89671	7.38626	4.47226	4.7239	6.17229	6.91239	1.70425	4.57695	5.65452	7.28966	7.22848	8.19498	7.97647	8.95009
1.5	0.0019	5.21016	5.5035	5.87303	2.70155	4.83737	5.86133	7.37891	4.4681	4.71437	6.09828	6.89434	1.7037	4.55736	5.61806	7.28503	7.22411	8.19879	7.97212	8.93023
1.52	0	5.2088	5.4986	5.87194	2.69556	4.83329	5.83167	7.37782	4.46967	4.71138	6.02919	6.88287	1.70942	4.54376	5.58704	7.28612	7.22555	8.20886	7.97321	8.91554
1.54	0.00408	5.21316	5.49888	5.87657	2.69447	4.83492	5.80691	7.38272	4.47634	4.7141	5.96471	6.87733	1.72058	4.53532	5.56119	7.29238	7.23223	8.22437	7.97947	8.90547
1.56	0.01388	5.22268	5.5035	5.88609	2.69774	4.84199	5.78677	7.39279	4.48776	4.72226	5.90473	6.87736	1.7369	4.53151	5.54024	7.30353	7.24381	8.24505	7.99008	8.89921
1.58	0.0283	5.2371	5.51221	5.90024	2.70508	4.85397	5.77099	7.40803	4.5027	4.73532	5.84826	6.88177	1.75758	4.53151	5.52309	7.31877	7.25917	8.27035	8.00423	8.89649
1.6	0.04735	5.25588	5.52418	5.91875	2.7157	4.87056	5.75874	7.42735	4.52102	4.75274	5.79535	6.89046	1.78235	4.53505	5.51003	7.33755	7.27822	8.29974	8.0211	8.89649
1.62	0.07075	5.27846	5.53942	5.94052	2.7293	4.8907	5.75031	7.45048	4.54226	4.77424	5.74585	6.90307	1.81065	4.54158	5.50078	7.35932	7.30061	8.33267	8.04042	8.89921
1.64	0.09769	5.30431	5.55738	5.96555	2.74563	4.91465	5.74487	7.47742	4.56536	4.79927	5.69908	6.91868	1.84221	4.55029	5.49479	7.38381	7.32541	8.36886	8.06164	8.90356
1.66	0.12789	5.33343	5.57752	5.99331	2.76386	4.94159	5.74215	7.50735	4.58975	4.82757	5.65502	6.93694	1.8765	4.56117	5.4918	7.41048	7.3521	8.40804	8.08341	8.90928
1.68	0.16136	5.36037	5.59901	6.01154	2.78264	4.96472	5.74051	7.5332	4.61507	4.85451	5.61405	6.95776	1.91405	4.56879	5.49126	7.43497	7.37389	8.45049	8.10464	8.90302
1.7	0.19728	5.39493	5.62541	6.04283	2.80468	4.99764	5.74323	7.5683	4.64005	4.88852	5.57581	6.98022	1.95296	4.58294	5.49561	7.46544	7.40504	8.49403	8.12559	8.90683
1.72	0.23592	5.43166	5.6548	6.07467	2.82781	5.03274	5.74813	7.60558	4.66444	4.92526	5.54119	7.00451	1.99351	4.59791	5.50269	7.49701	7.43756	8.5392	8.14437	8.90901
1.74	0.27647	5.47003	5.68691	6.10651	2.85175	5.07002	5.75521	7.64477	4.68674	4.9639	5.51012	7.02973	2.03596	4.61342	5.51275	7.52884	7.4706	8.58573	8.16015	8.90846
1.76	0.31919	5.51003	5.72201	6.13725	2.87624	5.10894	5.76446	7.68531	4.70646	5.00444	5.48374	7.05606	2.07922	4.62947	5.52527	7.56068	7.50447	8.63308	8.17103	8.90465
1.78	0.36354	5.55112	5.75874	6.16882	2.90101	5.14948	5.77534	7.72722	4.72218	5.04662	5.46249	7.08286	2.12358	4.6458	5.54078	7.59252	7.53887	8.68125	8.17566	8.89594
1.8	0.40926	5.5933	5.79357	6.20365	2.92604	5.19139	5.7884	7.76994	4.73273	5.09043	5.44712	7.10979	2.16847	4.66213	5.55847	7.62327	7.57429	8.72995	8.17158	8.88234
1.82	0.45633	5.63602	5.82568	6.24311	2.9508	5.23411	5.80283	7.81293	4.73728	5.13533	5.43857	7.13678	2.21419	4.67818	5.57833	7.6532	7.61308	8.77839	8.1577	8.86492
1.84	0.50477	5.67874	5.85643	6.28501	2.97556	5.27792	5.81915	7.85647	4.73529	5.18105	5.43748	7.16379	2.25991	4.69451	5.60065	7.68177	7.65725	8.82628	8.13267	8.84533
1.86	0.55402	5.72174	5.88773	6.32801	3.00005	5.32255	5.83739	7.90001	4.72608	5.22812	5.44358	7.19025	2.30562	4.71056	5.62486	7.70871	7.70542	8.87363	8.09702	8.82792
1.88	0.60409	5.76391	5.91984	6.371	3.02373	5.36799	5.85698	7.94327	4.71007	5.27574	5.45657	7.21613	2.35134	4.72662	5.65099	7.73402	7.75642	8.91962	8.05239	8.81622
1.9	0.65471	5.805	5.95358	6.41399	3.04686	5.41398	5.8782	7.98627	4.68792	5.32418	5.47549	7.24118	2.39651	4.74267	5.67847	7.75715	7.80945	8.9637	8.00123	8.81159
1.92	0.70614	5.84446	5.98922	6.45672	3.06917	5.46024	5.90079	8.0279	4.66112	5.37316	5.49965	7.26573	2.44141	4.759	5.70759	7.77756	7.86457	9.00425	7.94627	8.81377
1.94	0.75784	5.88147	6.02678	6.49889	3.09067	5.50704	5.92528	8.0679	4.63047	5.42268	5.52767	7.28928	2.48576	4.77505	5.73806	7.79524	7.92115	9.04044	7.8894	8.82057
1.96	0.80981	5.91575	6.06705	6.54053	3.11108	5.55384	5.95086	8.10518	4.59726	5.47221	5.55946	7.31192	2.52903	4.79138	5.7699	7.80994	7.97884	9.06983	7.83225	8.83091
1.98	0.86206	5.94677	6.11004	6.58134	3.13067	5.60092	5.97807	8.13865	4.56259	5.52201	5.59647	7.33374	2.57148	4.80771	5.80283	7.82137	8.03572	9.08969	7.77565	8.84315
2	0.91457	5.97507	6.15521	6.62135	3.1489	5.64772	6.00664	8.16614	4.52739	5.57153	5.62899	7.35485	2.61284	4.82403	5.83739	7.8298	8.08294	9.09595	7.71987	8.85703
2.05	1.04519	6.03821	6.2744	6.71631	3.18727	5.76283	6.08365	8.17076	4.43895	5.69208	5.69474	7.40338	2.71107	4.86431	5.92963	7.83307	8.21715	9.03037	7.58789	8.8973
2.1	1.17472	6.09753	6.39495	6.80285	3.21203	5.87521	6.16855	8.05865	4.35309	5.76802	5.81562	7.44686	2.80032	4.90567	6.02977	7.81919	8.34178	8.9003	7.4668	8.88288
2.15	1.30261	6.13345	6.52148	6.88557	3.2387	5.98732	6.25835	8.03443	4.27008	5.89265	5.91439	7.48571	2.88087	4.95057	6.13317	7.81837	8.43862	8.80642	7.34979	8.79526
2.2	1.42805	6.15984	6.64638	6.96094	3.2621	6.09644	6.3525	8.02164	4.18956	6.01384	6.02841	7.51916	2.95243	5.00036	6.23739	7.81674	8.51355	8.72587	7.24095	8.71308
2.25	1.55078	6.18297	6.76557	7.02816	3.28142	6.20256	6.44991	8.01076	4.11242	6.08909	6.13271	7.54613	3.01448	5.05479	6.34134	7.81266	8.45288	8.65404	7.14081	8.63989
2.3	1.66969	6.20664	6.87604	7.08693	3.29693	6.30515	6.54896	7.99987	4.03881	6.07467	6.24817	7.56407	3.06781	5.11329	6.4442	7.80586	8.45303	8.58791	7.04938	8.57376
2.35	1.78452	6.2246	6.98326	7.13754	3.3089	6.40447	6.64801	7.98899	3.96943	6.11331	6.35998	7.57134	3.11325	5.17533	6.54488	7.79715	8.43158	8.52696	6.96611	8.51281
2.4	1.89527	6.23739	7.08775	7.18108	3.31816	6.50053	6.74625	7.9781	3.90486	6.14596	6.46818	7.56766	3.15108	5.23928	6.64284	7.78708	8.37269	8.47036	6.89074	8.45648
2.45	2.0014	6.24637	7.18816	7.21782	3.32469	6.59332	6.84285	7.96722	3.84487	6.17317	6.57226	7.55448	3.18292	5.30459	6.73781	7.7762	8.32453	8.41838	6.82217	8.40451
2.5	2.1029	6.25318	7.24884	7.28367	3.32958	6.68284	6.937	7.95634	3.78966	6.19549	6.67222	7.53623	3.20931	5.36989	6.82897	7.76504	8.28749	8.37022	6.76067	8.35661
2.55	2.19922	6.25807	7.27523	7.37456	3.33285	6.76829	7.02788	7.94572	3.73874	6.21372	6.76752	7.51754	3.23108	5.43438	6.91659	7.75415	8.25526	8.32614	6.70488	8.3128
2.6	2.29093	6.26161	7.32558	7.43469	3.33503	6.84965	7.1155	7.93565	3.69263	6.22896	6.85865	7.50239	3.24931	5.49752	6.99986	7.74409	8.22763	8.28587	6.65482	8.27253
2.65	2.37746	6.2646	7.33755	7.52231	3.33612	6.92693	7.19959	7.92613	3.65064	6.24175	6.94502	7.49126	3.26428	5.55792	7.07877	7.73456	8.20352	8.24886	6.60992	8.23552
2.7	2.45882	6.26705	7.34789	7.6034	3.33639	6.99958	7.27959	7.9177	3.61252	6.25236	7.02656	7.48366	3.27679	5.61588	7.15333	7.72667	8.18238	8.21512	6.56964	8.20205
2.75	2.53556	6.26923	7.3566	7.67878	3.33639	7.06734	7.35551	7.91035	3.57851	6.26134	7.10377	7.47925	3.28713	5.67058	7.22326	7.71987	8.16428	8.18464	6.53345	8.17158
2.8	2.60712	6.27113	7.36503	7.7479	3.33612	7.13047	7.42707	7.90436	3.54772	6.26896	7.17601	7.47666	3.29611	5.72174	7.28857	7.7147	8.1484	8.15688	6.50134	8.14382
2.85	2.67379	6.27331	7.37646	7.80749	3.33557	7.18816	7.49456	7.90001	3.52004	6.27522	7.24345	7.47548	3.30346	5.76936	7.34952	7.71062	8.13563	8.13185	6.4725	8.11879
2.9	2.73583	6.27549	7.38843	7.86055	3.33503	7.24095	7.55714	7.89756	3.49536	6.28093	7.30629	7.47547	3.30972	5.81317	7.40558	7.7079	8.13743	8.10899	6.44692	8.0962
2.95	2.79325	6.27794	7.39986	7.90817	3.33421	7.2883	7.61374	7.89865	3.4733	6.28583	7.36442	7.47619	3.31489	5.85371	7.4581	7.70599	8.18367	8.08858	6.42433	8.07552
3	2.84631	6.28039	7.41102	7.95035	3.33367	7.33047	7.65592	7.91198	3.45372	6.29018	7.40191	7.49544	3.31952	5.89045	7.50898	7.70191	8.17605	8.07008	6.40393	8.05729
3.05	2.89502	6.28284	7.42163	7.98763	3.33285	7.36721	7.69701	7.92395	3.43621	6.29399	7.41321	7.53909	3.3236	5.92392	7.55633	7.69783	8.16237	8.05348	6.38597	8.04069
3.1	2.93937	6.28528	7.43197	8.02028	3.33231	7.39905	7.74762	7.92395	3.42038	6.29726	7.46159	7.53632	3.32714	5.95412	7.59959	7.69483	8.1492	8.03879	6.37018	8.02572
3.15	2.98019	6.28773	7.44177	8.04858	3.33176	7.42626	7.79606	7.92423	3.40663	6.30025	7.50562	7.53456	3.33013	5.98133	7.63823	7.69293	8.13772	8.02545	6.35603	8.01266
3.2	3.0172	6.29045	7.45129	8.0728	3.33149	7.44884	7.84041	7.9264	3.39429	6.30297	7.53352	7.54471	3.33312	6.0061	7.67252	7.69239	8.12743	8.01348	6.34379	8.00069
3.25	3.05094	6.2929	7.46	8.09375	3.33122	7.46735	7.88042	7.93076	3.38351	6.30542	7.53874	7.57402	3.33557	6.02814	7.69266	7.703	8.11855	8.00287	6.33263	7.99008
3.3	3.08142	6.29508	7.46844	8.11171	3.33095	7.48259	7.91552	7.93783	3.3739	6.30787	7.49093	7.64854	3.33775	6.048	7.69375	7.72939	8.1107	7.99361	6.32311	7.98055
3.35	3.1089	6.29753	7.47605	8.12668	3.33067	7.49483	7.93593	7.95688	3.36536	6.31005	7.49044	7.67675	3.33965	6.06596	7.69701	7.75143	8.10382	7.98518	6.31467	7.97212
3.4	3.13366	6.29971	7.4834	8.13974	3.33067	7.50463	7.9479	7.98191	3.35782	6.31195	7.49203	7.70005	3.34156	6.08229	7.70626	7.76477	8.09782	7.97756	6.30733	7.96477
3.5	3.17584	6.30352	7.49592	8.15988	3.33067	7.51878	7.96831	8.02736	3.34524	6.31522	7.49522	7.73853	3.34455	6.11004	7.72885	7.78137	8.08799	7.96532	6.29508	7.95225
3.6	3.21013	6.30705	7.50653	8.1743	3.33095	7.52803	7.98654	8.06436	3.3359	6.31821	7.49853	7.76881	3.34727	6.13317	7.7264	7.81239	8.081	7.95552	6.28583	7.94246
3.7	3.23734	6.30977	7.51497	8.18464	3.33122	7.53456	8.00205	8.09402	3.3285	6.32066	7.50136	7.79198	3.34945	6.15249	7.7264	7.83361	8.07561	7.9479	6.27875	7.93511
3.8	3.25883	6.3125	7.52177	8.19253	3.33176	7.53891	8.01511	8.11797	3.32278	6.32284	7.50354	7.80994	3.35135	6.16936	7.72477	7.85021	8.07146	7.94219	6.27331	7.92912
3.9	3.27625	6.3144	7.52694	8.19824	3.33231	7.54245	8.026	8.13702	3.31868	6.32447	7.50571	7.82405	3.35299	6.18433	7.7215	7.86327	8.06875	7.93756	6.2695	7.92477
4	3.28986	6.31631	7.53129	8.2026	3.33285	7.5449	8.0347	8.15199	3.31545	6.3261	7.50749	7.83486	3.35462	6.19739	7.71688	7.87334	8.06661	7.93429	6.26651	7.9215
4.1	3.30074	6.31794	7.53456	8.20586	3.33339	7.54653	8.04178	8.16396	3.31317	6.32746	7.50917	7.84342	3.35571	6.20909	7.71171	7.8815	8.0652	7.93157	6.2646	7.91878
4.2	3.30918	6.31903	7.53728	8.20858	3.33394	7.54816	8.04749	8.17348	3.31133	6.32882	7.51045	7.84996	3.3568	6.21971	7.70599	7.88803	8.06405	7.92967	6.26297	7.91688
4.3	3.31598	6.32012	7.53946	8.21076	3.33448	7.54925	8.05212	8.1811	3.31013	6.32964	7.51172	7.85524	3.35761	6.22868	7.70055	7.89293	8.06339	7.92831	6.26188	7.91552
4.4	3.32142	6.3212	7.54109	8.21239	3.33503	7.55007	8.05593	8.18709	3.30934	6.33073	7.5129	7.85948	3.35843	6.23603	7.69565	7.89701	8.06304	7.92749	6.26107	7.9147
4.5	3.3255	6.32202	7.54245	8.21376	3.33557	7.55089	8.05892	8.19199	3.30859	6.33127	7.5137	7.86263	3.35924	6.24229	7.69157	7.90028	8.06262	7.92667	6.26079	7.91389
4.6	3.32877	6.32256	7.54381	8.21484	3.33584	7.55143	8.06137	8.1958	3.3081	6.33209	7.51446	7.86517	3.35979	6.24719	7.6883	7.90273	8.0624	7.92613	6.26052	7.91361
PECs of the spin-free states along the Si-Br bond length Corresponding data
RSS	E111	E211	E311	E411	E112	E212	E312	E412	E131	E231	E331	E431	E132	E232	E332	E432	E532	E151	E152	E252
4.6	3.55925	4.01858	4.04279	5.70868	4.02674	4.04824	4.06783	7.03713	4.02239	4.05041	4.05613	5.56799	4.03218	4.04579	4.0681	5.61208	5.65969	5.78813	5.77262	5.78024
4.5	3.49639	3.98293	4.01477	5.63684	3.99273	4.01912	4.04143	7.00639	3.99109	4.01939	4.02728	5.5386	3.99762	4.01749	4.04007	5.57969	5.61561	5.75847	5.74351	5.75085
4.4	3.44442	3.96742	4.00688	5.59031	3.97912	4.00715	4.03899	6.93809	3.97966	4.00796	4.01912	5.52881	3.98266	4.00524	4.03762	5.49833	5.65779	5.74976	5.73425	5.74187
4.3	3.38891	3.95517	4.00715	5.56173	3.97068	4.00497	4.04035	6.91006	3.97368	4.00415	4.0183	5.52881	3.97395	4.00143	4.03762	5.46949	5.65616	5.74759	5.73344	5.74051
4.2	3.32197	3.94266	4.0096	5.54622	3.96225	4.00443	4.04416	6.87115	3.96796	4.00334	4.01967	5.53071	3.96524	3.99844	4.0398	5.43357	5.65779	5.74732	5.73398	5.74187
4.1	3.24169	3.92878	4.01477	5.54541	3.95327	4.00497	4.05069	6.81699	3.96116	3.99545	4.03273	5.53452	3.95626	3.99572	4.04388	5.3884	5.66187	5.74868	5.73698	5.74514
4	3.14754	3.91381	4.02239	5.5601	3.94375	4.00688	4.06021	6.74434	3.95327	3.99817	4.04062	5.54024	3.94592	3.99327	4.05041	5.33234	5.6684	5.75194	5.74296	5.75058
3.9	3.03897	3.89694	4.033	5.59167	3.93313	4.00932	4.07354	6.65182	3.94402	4.00361	4.05205	5.54813	3.93422	3.99	4.05994	5.26377	5.67738	5.75738	5.75031	5.76038
3.8	2.9157	3.87871	4.04796	5.64119	3.92143	4.01313	4.09123	6.53971	3.93368	4.01232	4.06783	5.55765	3.92007	3.9862	4.073	5.18214	5.68908	5.76582	5.75983	5.77534
3.7	2.77774	3.85857	4.06728	5.70922	3.9081	4.01776	4.11463	6.4091	3.92198	4.02402	4.08933	5.56881	3.90211	3.98102	4.09096	5.08826	5.70459	5.77752	5.77262	5.7963
3.6	2.62563	3.83708	4.09259	5.79684	3.89286	4.02347	4.14538	6.26161	3.90891	4.03953	4.11844	5.58078	3.87817	3.97395	4.1149	4.98431	5.72473	5.79385	5.79004	5.82514
3.5	2.45991	3.81504	4.12416	5.9046	3.87544	4.03082	4.18538	6.0997	3.89422	4.05858	4.15681	5.59139	3.84415	3.96497	4.14674	4.87601	5.75113	5.81589	5.81317	5.86296
3.4	2.28167	3.79572	4.16171	6.03331	3.85558	4.03926	4.23708	5.92609	3.87789	4.08116	4.20688	5.59847	3.79272	3.95409	4.1881	4.77152	5.78568	5.84528	5.84337	5.91276
3.3	2.09419	3.78918	4.19681	6.18215	3.83191	4.04878	4.30348	5.74541	3.85939	4.10729	4.27137	5.59956	3.71408	3.94293	4.13286	4.7922	5.8314	5.88392	5.8831	5.97752
3.2	1.91106	3.85803	4.2311	6.26705	3.80306	4.05885	4.38784	5.56364	3.83925	4.18674	4.30212	5.59656	3.59871	3.93286	4.2281	4.70458	5.88936	5.93426	5.93399	6.06052
3.1	1.80248	3.95409	4.39246	6.211	3.76388	4.0681	4.49423	5.39057	3.81939	4.22756	4.39437	5.59629	3.44469	3.92443	4.33831	4.65315	5.9563	5.99766	5.99739	6.16474
3.05	1.68928	3.96524	4.43954	6.171	3.73939	4.07246	4.55736	5.31003	3.81095	4.24688	4.44933	5.60282	3.35271	3.92225	4.39845	4.64362	5.99657	6.03657	6.0363	6.22732
3	1.56601	3.97776	4.49287	6.12283	3.71054	4.07654	4.60607	5.26159	3.80415	4.26484	4.51083	5.6167	3.25203	3.92143	4.45967	4.64852	6.0412	6.0812	6.08038	6.29807
2.95	1.43948	3.993	4.55138	6.07929	3.67571	4.08089	4.60525	5.28853	3.80007	4.28035	4.57995	5.63983	3.144	3.92252	4.51627	4.67328	6.09045	6.13208	6.13045	6.37753
2.9	1.3105	4.0115	4.61423	6.0431	3.63299	4.08579	4.7141	5.2118	3.79925	4.29314	4.65696	5.67493	3.02999	3.92551	4.56308	4.72335	6.14406	6.1895	6.18678	6.46597
2.85	1.18043	4.03409	4.68063	6.01752	3.58129	4.09205	4.8341	5.14812	3.80279	4.30321	4.74267	5.72446	2.91107	3.93123	4.60308	4.79655	6.20229	6.25454	6.25018	6.56475
2.8	1.04954	4.06184	4.74975	6.00474	3.52006	4.10103	4.96499	5.09968	3.81177	4.31028	4.83791	5.79058	2.78862	3.93994	4.64226	4.88798	6.26542	6.32828	6.3212	6.67441
2.75	0.9192	4.09531	4.82077	6.008	3.44904	4.11382	5.07519	5.1005	3.82755	4.31545	4.94349	5.87684	2.66372	3.95218	4.68417	4.99465	6.33263	6.41182	6.40148	6.79604
2.7	0.79022	4.13613	4.89261	6.02923	3.36931	4.1315	5.04417	5.27302	3.85612	4.32198	5.06023	5.99657	2.53828	3.96905	4.7307	5.11683	6.40393	6.50624	6.491	6.93074
2.66	0.68818	4.17531	4.95029	6.06025	3.3002	4.15001	5.05887	5.39493	3.95898	4.2711	5.16309	6.16093	2.43868	3.98565	4.77179	5.22622	6.46406	6.5906	6.57019	7.04856
2.64	0.63811	4.19708	4.97832	6.08202	3.26455	4.16144	5.07002	5.45969	3.9715	4.2779	5.21778	6.21943	2.38916	3.99572	4.79383	5.28472	6.49481	6.63604	6.61291	7.11115
2.62	0.58913	4.22021	5.00608	6.10787	3.22809	4.17395	5.08336	5.52718	3.98538	4.28253	5.27465	6.27413	2.33963	4.0066	4.81669	5.34622	6.52583	6.6842	6.65781	7.17591
2.6	0.54069	4.24498	5.03329	6.13753	3.19108	4.1881	5.09941	5.59765	4.00062	4.28661	5.33397	6.32991	2.29065	4.01885	4.84063	5.41071	6.5574	6.73454	6.70461	7.2434
2.58	0.49307	4.27191	5.05996	6.16991	3.1538	4.20389	5.11764	5.67112	4.01749	4.29096	5.39574	6.38842	2.24249	4.03245	4.86567	5.4782	6.58896	6.78761	6.75359	7.31333
2.56	0.44681	4.30049	5.08635	6.17154	3.11652	4.2213	5.13805	5.74732	4.03572	4.29559	5.46051	6.45127	2.19514	4.04715	4.89206	5.54867	6.6208	6.84339	6.80502	7.38571
2.54	0.40164	4.33124	5.1122	6.13127	3.07924	4.24062	5.16118	5.82704	4.05558	4.30103	5.52772	6.5193	2.14861	4.06348	4.91955	5.62242	6.65291	6.90217	6.85863	7.46109
2.52	0.35783	4.36443	5.13778	6.08827	3.04223	4.26185	5.18649	5.90977	4.07735	4.30783	5.59765	6.59332	2.10317	4.08116	4.94866	5.6997	6.68502	6.96366	6.91496	7.53891
2.5	0.31538	4.39981	5.16282	6.04963	3.00604	4.28525	5.21452	5.99576	4.10021	4.31654	5.67058	6.67305	2.05881	4.10048	4.97914	5.78024	6.7174	7.02843	6.97373	7.61973
2.48	0.27456	4.4379	5.18785	6.01698	2.97067	4.31083	5.24499	6.08528	4.12225	4.32987	5.74623	6.75822	2.01609	4.12144	5.01125	5.8646	6.75005	7.09646	7.03496	7.70327
2.46	0.23592	4.47872	5.21261	5.98732	2.93611	4.33858	5.27792	6.17807	4.13858	4.35328	5.82487	6.84802	1.975	4.14429	5.04526	5.95276	6.78298	7.16802	7.0989	7.79007
2.44	0.19919	4.5228	5.23737	5.9582	2.90291	4.36906	5.31384	6.27467	4.15409	4.38158	5.90623	6.94162	1.93582	4.16906	5.08118	6.04446	6.81618	7.2434	7.16584	7.8796
2.42	0.16463	4.56988	5.26241	5.93045	2.87162	4.40226	5.35248	6.37454	4.18402	4.39981	5.99086	7.03496	1.89881	4.19599	5.11928	6.14052	6.84992	7.32231	7.23551	7.97212
2.4	0.13252	4.62049	5.28772	5.90433	2.84168	4.43845	5.39411	6.47794	4.22293	4.41369	6.07848	7.0502	1.86398	4.22511	5.15982	6.24039	6.88448	7.4053	7.30816	8.0679
2.38	0.10313	4.67492	5.31329	5.88092	2.8142	4.47763	5.43901	6.58488	4.26702	4.42784	6.16909	7.03686	1.8316	4.25668	5.20282	6.34461	6.91985	7.49265	7.38381	8.16668
2.36	0.07701	4.73315	5.33914	5.86051	2.78917	4.52008	5.48717	6.69536	4.31572	4.44307	6.2627	7.05591	1.80221	4.29069	5.2488	6.45291	6.95659	7.58408	7.46245	8.26899
2.34	0.05388	4.79601	5.365	5.84392	2.76658	4.56607	5.53888	6.80883	4.36906	4.46022	6.3593	7.0785	1.77609	4.3277	5.29806	6.56583	6.99414	7.68014	7.54408	8.3743
2.32	0.03456	4.86322	5.39085	5.83249	2.74726	4.61614	5.59439	6.9253	4.42702	4.47981	6.45862	7.10407	1.75323	4.36743	5.35085	6.68284	7.03333	7.78082	7.62925	8.48315
2.3	0.01905	4.93533	5.41615	5.8265	2.73148	4.66974	5.65425	7.04421	4.48607	4.50512	6.56012	7.13374	1.73445	4.41042	5.40772	6.80421	7.07414	7.88667	7.71742	8.59553
2.28	0.00789	5.01234	5.44119	5.82759	2.71951	4.72798	5.71847	7.16503	4.4975	4.58512	6.66379	7.16829	1.71949	4.45668	5.46894	6.92965	7.11686	7.9977	7.80858	8.71145
2.26	0.00136	5.09451	5.46595	5.8363	2.71161	4.79084	5.78759	7.28694	4.52689	4.65723	6.76829	7.20857	1.70942	4.50675	5.53507	7.05863	7.16122	8.11389	7.903	8.83118
2.24	0	5.18159	5.49098	5.8529	2.70835	4.85832	5.86188	7.40939	4.5609	4.73342	6.87278	7.25646	1.70425	4.56063	5.60636	7.19061	7.20775	8.2358	8.00069	8.95445
2.22	0.00408	5.27357	5.51738	5.87793	2.71053	4.93125	5.94188	7.53075	4.59872	4.81614	6.97509	7.31442	1.70425	4.61859	5.68364	7.30136	7.27823	8.36342	8.10137	9.0818
2.2	0.01415	5.36908	5.54296	5.91603	2.71787	5.00989	6.02814	7.65021	4.64036	4.90567	7.07251	7.38517	1.71051	4.68117	5.76718	7.34707	7.41701	8.4973	8.20532	9.2135
2.18	0.03075	5.46677	5.56309	5.9748	2.73175	5.09424	6.1212	7.7664	4.68553	5.00281	7.16231	7.4717	1.7233	4.74866	5.85807	7.38544	7.56395	8.63716	8.31199	9.34901
2.16	0.05442	5.56201	5.59303	6.04501	2.75216	5.18486	6.22134	7.87878	4.73505	5.10785	7.24231	7.57619	1.74289	4.82158	5.95657	7.43524	7.69864	8.78383	8.42165	9.48942
2.14	0.08572	5.61969	5.66759	6.12691	2.77991	5.28227	6.32937	7.98681	4.78866	5.22159	7.31306	7.69837	1.7701	4.90023	6.06324	7.49265	7.82627	8.93703	8.53431	9.63419
2.12	0.12517	5.65643	5.76718	6.22624	2.81583	5.38704	6.44638	8.0894	4.84662	5.34486	7.37265	7.84041	1.80575	4.9854	6.17943	7.5547	7.95389	9.09731	8.64914	9.78385
2.1	0.17361	5.70487	5.85779	6.34542	2.86046	5.49969	6.57291	8.18328	4.90948	5.4782	7.44558	7.97593	1.85037	5.07764	6.30542	7.62055	8.08695	9.26493	8.76669	9.93814
2.08	0.23157	5.76201	5.94297	6.48638	2.91461	5.62051	6.71005	8.2592	4.97696	5.62242	7.55442	8.08287	1.9048	5.17751	6.44229	7.69048	8.2309	9.43963	8.88642	10.0979
2.06	0.30014	5.82868	6.02406	6.64801	2.97883	5.75004	6.85863	8.30083	5.04962	5.77861	7.65211	8.21131	1.96983	5.28581	6.59087	7.76422	8.38927	9.62194	9.00806	10.2625
2.04	0.38014	5.90541	6.10515	6.82842	3.05339	5.88963	7.01972	8.31988	5.12907	5.94759	7.75388	8.34682	2.0463	5.40364	6.75223	7.84477	8.5626	9.81242	9.13296	10.4339
2.02	0.47239	5.99276	6.19032	7.02543	3.14074	6.04093	7.19414	8.35961	5.21833	6.13018	7.86463	8.48805	2.135	5.53235	6.92747	7.93702	8.74819	10.0113	9.2633	10.6154
2	0.5777	6.09181	6.28284	7.23795	3.24196	6.20419	7.38218	8.42709	5.31792	6.32773	7.98681	8.63472	2.23732	5.67221	7.11741	8.04477	8.94193	10.2201	9.40044	10.8078
1.98	0.69743	6.20419	6.38379	7.4668	3.35788	6.3808	7.58544	8.5158	5.42867	6.54107	8.12178	8.78737	2.35433	5.82487	7.32313	8.17076	9.14112	10.4394	9.54575	11.0116
1.96	0.8324	6.331	6.49454	7.71252	3.48986	6.571	7.80477	8.62301	5.55167	6.77128	8.27117	8.94765	2.48685	5.9914	7.54517	8.3177	9.34548	10.6704	9.70058	11.2285
1.94	0.98451	6.4725	6.6159	7.97593	3.63898	6.77618	8.04151	8.74846	5.68799	7.02026	8.43689	9.11772	2.63678	6.17317	7.78463	8.48315	9.56208	10.9139	9.8663	11.4598
1.92	1.15403	6.61754	6.75767	8.25757	3.8066	6.99795	8.29702	8.89213	5.83929	7.28911	8.62329	9.29867	2.80495	6.37182	8.0426	8.66247	9.80045	11.1678	10.0456	11.7061
1.9	1.34179	6.75876	6.92638	8.5607	3.99354	7.23768	8.57158	9.05404	6.00446	7.58	8.83608	9.49187	2.99325	6.58842	8.31934	8.85431	10.0663	11.4315	10.2372	11.9635
1.85	1.91296	7.23578	7.45456	9.41704	4.55845	7.92259	9.33105	9.5931	6.5076	8.41158	9.43527	10.0609	3.56115	7.21863	9.07146	9.4467	10.8641	12.2065	10.7983	12.7115
PECs of the spin-free states along the H-Si-Br bond angle Corresponding data
H-Si-Br	E111	E211	E311	E411	E112	E212	E312	E412	E131	E231	E331	E431	E132	E232	E332	E432	E532	E151	E152	E252
55	1.65745	5.6635	6.36746	6.85019	3.3372	6.26379	7.50408	7.80014	5.04826	6.23494	7.23659	7.41075	2.96958	5.07601	7.17619	7.25319	8.51879	9.61351	7.6317	10.1792
60	1.2158	5.53425	6.3427	6.41889	3.23081	5.79902	6.90081	8.0992	4.93642	5.72146	6.84094	7.31333	2.8093	4.68716	6.67522	7.22925	7.99035	9.22738	7.53102	9.75827
65	0.85253	5.47847	5.95521	6.40801	3.14727	5.4352	6.42134	7.75878	4.85016	5.33778	6.58788	7.23115	2.64631	4.42593	6.23875	7.23415	7.62463	8.89975	7.50571	9.41514
70	0.56355	5.48445	5.66051	6.35359	3.07679	5.16608	6.0812	7.53755	4.76879	5.06213	6.47495	7.1819	2.46916	4.28661	5.91984	7.24231	7.3849	8.6475	7.53701	9.16098
72	0.46722	5.52745	5.53643	6.32284	3.04876	5.082	5.98106	7.4766	4.73668	4.97723	6.46297	7.16965	2.39542	4.25994	5.82242	7.24503	7.32041	8.56696	7.56095	9.08316
74	0.3815	5.47983	5.51684	6.28801	3.02046	5.01016	5.8997	7.42925	4.70539	4.9054	6.46597	7.16095	2.3214	4.24688	5.74051	7.23251	7.28557	8.4973	7.5898	9.0184
76	0.30558	5.41833	5.52445	6.24964	2.99135	4.95002	5.83575	7.3936	4.67573	4.84526	6.48148	7.1555	2.24766	4.24552	5.6733	7.18789	7.29537	8.43716	7.62272	8.96561
78	0.23919	5.36527	5.53479	6.20882	2.96141	4.90104	5.78759	7.3683	4.64825	4.79573	6.50706	7.15333	2.17555	4.25396	5.61942	7.15877	7.30163	8.38628	7.65892	8.92452
80	0.18177	5.32091	5.54541	6.16583	2.93067	4.86213	5.75412	7.35224	4.62376	4.75655	6.54053	7.1536	2.10562	4.27083	5.57861	7.14108	7.30626	8.34383	7.69728	8.89404
82	0.13306	5.28499	5.55439	6.12174	2.89883	4.83329	5.73371	7.34408	4.60253	4.72634	6.57917	7.15687	2.03868	4.2945	5.54922	7.13129	7.31034	8.30845	7.73701	8.8739
84	0.09252	5.25669	5.56037	6.07739	2.86617	4.81369	5.72527	7.34217	4.58457	4.70458	6.62162	7.16231	1.97473	4.32416	5.53126	7.12857	7.31333	8.27988	7.77756	8.86302
86	0.05959	5.23547	5.56201	6.03358	2.83352	4.80254	5.728	7.34517	4.57015	4.69097	6.66597	7.17047	1.91459	4.35872	5.52337	7.13129	7.31442	8.25702	7.81783	8.86057
88	0.03429	5.22078	5.55847	5.99086	2.80087	4.79927	5.74024	7.35143	4.55899	4.68444	6.7106	7.18108	1.85799	4.39709	5.525	7.13809	7.31333	8.23906	7.85729	8.86547
90	0.01633	5.2118	5.55139	5.94786	2.76849	4.80308	5.76119	7.35959	4.55138	4.68498	6.75441	7.19414	1.80575	4.43899	5.53534	7.14816	7.30925	8.22491	7.89538	8.8769
92	0.0049	5.20799	5.55466	5.88909	2.73692	4.81369	5.79004	7.36775	4.54621	4.69151	6.79577	7.2102	1.75731	4.48389	5.55411	7.15986	7.30163	8.21376	7.9313	8.8935
94	0	5.20853	5.50377	5.88364	2.70672	4.83029	5.82596	7.3751	4.54348	4.70403	6.83414	7.2287	1.71296	4.53151	5.58024	7.1721	7.2902	8.20478	7.96423	8.9139
96	0.00136	5.21234	5.4703	5.85589	2.67787	4.85206	5.86813	7.38081	4.54212	4.72199	6.8687	7.24993	1.67296	4.58131	5.61316	7.1838	7.27442	8.19716	7.99389	8.93649
98	0.00871	5.21887	5.43357	5.82895	2.65093	4.87927	5.91575	7.38435	4.54158	4.74485	6.89917	7.27333	1.63676	4.63301	5.65262	7.19387	7.25401	8.18954	8.01919	8.95989
100	0.02177	5.22649	5.39221	5.80446	2.6259	4.91111	5.96854	7.38653	4.54049	4.7726	6.92502	7.29836	1.60493	4.68662	5.69779	7.20476	7.22625	8.1811	8.03987	8.9822
102	0.04054	5.23384	5.34758	5.78378	2.60304	4.9473	6.02596	7.38735	4.53831	4.80499	6.94734	7.3234	1.5769	4.74213	5.7484	7.17836	7.22789	8.17103	8.05511	9.0018
104	0.06449	5.23792	5.30187	5.76691	2.58263	4.9873	6.08719	7.38789	4.53342	4.84145	6.96666	7.34789	1.55295	4.79954	5.80392	7.13999	7.23333	8.15852	8.06436	9.01703
106	0.09361	5.22948	5.26241	5.75575	2.56494	5.03111	6.15195	7.38871	4.52471	4.88172	6.98326	7.37075	1.53282	4.85859	5.86378	7.09401	7.2385	8.14246	8.06681	9.02629
108	0.12762	5.18676	5.25016	5.75194	2.54971	5.07873	6.21998	7.39007	4.51137	4.92608	6.99849	7.39116	1.51676	4.91927	5.92773	7.04013	7.2434	8.1226	8.06246	9.02901
110	0.16653	5.12499	5.2469	5.75766	2.53746	5.12962	6.29073	7.39252	4.49205	4.97397	7.01264	7.40884	1.50425	4.98186	5.99548	6.97836	7.24802	8.09838	8.05076	9.02438
112	0.21007	5.06812	5.22867	5.77425	2.52767	5.1835	6.3642	7.39605	4.4662	5.0254	7.02571	7.42408	1.49554	5.04581	6.06678	6.91115	7.2502	8.06981	8.03198	9.01186
114	0.25824	5.02703	5.18295	5.80174	2.52113	5.24037	6.43985	7.40068	4.43355	5.08009	7.03822	7.43769	1.49037	5.11166	6.14106	6.84257	7.24666	8.03688	8.00668	8.99173
116	0.31075	4.97179	5.14322	5.83847	2.51705	5.3005	6.5174	7.40612	4.39409	5.13778	7.04992	7.45048	1.48901	5.17887	6.21807	6.7691	7.24068	7.99933	7.97511	8.96479
118	0.36763	4.91247	5.10213	5.88283	2.51624	5.36309	6.59631	7.41211	4.34811	5.19873	7.06081	7.46327	1.49091	5.24771	6.29807	6.68584	7.2385	7.95824	7.9381	8.93186
120	0.42885	4.85179	5.0586	5.93317	2.51814	5.42813	6.67686	7.41809	4.29613	5.26241	7.07006	7.47742	1.49635	5.31765	6.38025	6.59413	7.23959	7.91334	7.89647	8.89404
122	0.49416	4.7892	5.01479	5.98841	2.52304	5.49588	6.75822	7.42354	4.23926	5.3288	7.07741	7.49293	1.50506	5.38813	6.45644	6.50515	7.24231	7.86572	7.85076	8.85186
124	0.56355	4.72471	4.97125	6.04773	2.53093	5.56582	6.83985	7.42735	4.17804	5.39792	7.08258	7.5098	1.51703	5.45887	6.36175	6.5857	7.24585	7.81565	7.80205	8.80669
126	0.63702	4.65859	4.92907	6.11059	2.54154	5.63765	6.92149	7.4268	4.11354	5.46976	7.08584	7.5283	1.53227	5.52826	6.23685	6.69699	7.2502	7.76368	7.75089	8.7588
128	0.7143	4.59138	4.88825	6.17698	2.55488	5.71167	7.00122	7.41565	4.04633	5.54377	7.08693	7.54844	1.5505	5.59275	6.11821	6.80638	7.2551	7.71062	7.69783	8.70955
130	0.79539	4.52308	4.84852	6.24637	2.57066	5.78677	7.07441	7.36476	3.97776	5.62024	7.08666	7.56993	1.57173	5.64418	6.02378	6.90489	7.26136	7.65619	7.64395	8.65866
132	0.88056	4.45369	4.80934	6.31821	2.58753	5.8616	6.94598	7.22326	3.90701	5.69915	7.08475	7.59116	1.59568	5.66051	5.98487	6.98217	7.26898	7.60095	7.58844	8.6056
134	0.96954	4.38403	4.77179	6.39223	2.60903	5.93208	6.51495	7.29347	3.83599	5.78024	7.08285	7.61374	1.62234	5.60963	6.01916	7.05401	7.28149	7.54572	7.53293	8.55226
136	1.06179	4.316	4.73723	6.46951	2.63461	5.9982	6.36937	7.35007	3.7666	5.86269	7.08149	7.64041	1.65227	5.50486	6.09889	7.12965	7.3087	7.49157	7.47878	8.5022
138	1.1573	4.24906	4.7043	6.54815	2.66318	6.04365	6.27767	7.3849	3.6983	5.94677	7.0804	7.67034	1.68493	5.37479	6.19902	7.18544	7.3702	7.4385	7.42544	8.45322
140	1.25635	4.18375	4.67274	6.62869	2.69393	6.02406	6.26188	7.40422	3.63136	6.03249	7.08067	7.70517	1.72058	5.23493	6.30678	7.2151	7.46136	7.38653	7.37347	8.4056
142	1.35866	4.12008	4.64253	6.71033	2.72767	5.89535	6.35576	7.41565	3.56605	6.1193	7.08203	7.7381	1.75922	5.09887	6.41046	7.23142	7.54354	7.33592	7.32258	8.35961
144	1.46424	4.05831	4.61369	6.79196	2.76386	5.77562	6.44039	7.42272	3.50265	6.20746	7.08503	7.74191	1.80112	5.09533	6.37835	7.2434	7.59089	7.28694	7.27387	8.31525
146	1.57255	3.99898	4.58566	6.87278	2.80277	5.65915	6.52556	7.42816	3.44142	6.29617	7.08993	7.71715	1.84575	4.98159	6.4608	7.25401	7.60749	7.24013	7.2268	8.27226
148	1.68384	3.94238	4.55899	6.95142	2.84441	5.54323	6.61345	7.43306	3.38292	6.38515	7.097	7.6796	1.89337	4.86022	6.55196	7.26489	7.60531	7.19523	7.18217	8.23117
150	1.79758	3.88851	4.53287	7.02625	2.88876	5.42731	6.70298	7.43823	3.32714	6.47413	7.10652	7.63769	1.94371	4.74022	6.64311	7.27687	7.59334	7.15251	7.13945	8.19226
152	1.91405	3.83762	4.50757	7.0921	2.93556	5.31248	6.79332	7.44367	3.27407	6.5623	7.1185	7.59442	1.99677	4.62131	6.734	7.2902	7.57565	7.11224	7.09918	8.15552
154	2.03242	3.79	4.48226	7.13319	2.98509	5.19873	6.88448	7.4502	3.22428	6.64937	7.13319	7.55116	2.05228	4.50376	6.8238	7.30544	7.55524	7.07414	7.06135	8.12124
156	2.15351	3.7451	4.45559	7.02054	3.03543	5.09043	6.97373	7.45374	3.18019	6.71196	7.177	7.60422	2.11106	4.38675	6.91087	7.31796	7.53538	7.0385	7.02625	8.08994
158	2.27705	3.70265	4.42865	6.44991	3.08985	4.97941	7.06299	7.46299	3.13584	6.7925	7.19986	7.5634	2.1712	4.27055	6.99577	7.33836	7.51415	7.00503	6.9936	8.0543
160	2.39868	3.66728	4.40552	6.2246	3.14672	4.87084	7.1487	7.47224	3.09584	6.86706	7.22217	7.52939	2.23433	4.15844	7.07496	7.35877	7.49401	6.97482	6.96366	8.02627
162	2.52005	3.63762	4.38103	6.04909	3.20632	4.76417	7.22952	7.48177	3.05992	6.93509	7.24666	7.49728	2.29991	4.04824	7.14707	7.37891	7.47769	6.94761	6.93645	8.00151
164	2.63978	3.61449	4.35491	5.88881	3.26836	4.65995	7.30353	7.49211	3.02727	6.9955	7.2736	7.46626	2.36793	3.94048	7.21074	7.38272	7.48041	6.92285	6.91196	7.98001
166	2.75651	3.59816	4.32525	5.74051	3.33312	4.55791	7.36803	7.50299	2.99842	7.04829	7.30245	7.43605	2.43868	3.83463	7.2668	7.36639	7.50354	6.90135	6.89047	7.96096
168	2.86781	3.59109	4.28797	5.60772	3.40061	4.45804	7.42136	7.51442	2.97312	7.09428	7.33265	7.40585	2.51134	3.73122	7.3117	7.34653	7.53211	6.8823	6.87169	7.94463
170	2.96931	3.59598	4.23191	5.50214	3.47081	4.36035	7.4619	7.52721	2.95189	7.13455	7.36803	7.37374	2.58617	3.63054	7.32041	7.35469	7.55987	6.86625	6.85564	7.93103
175	3.18101	3.64578	4.04633	5.32989	3.65857	4.12525	7.5117	7.56231	2.9157	7.2151	7.34081	7.44177	2.77556	3.39707	7.30299	7.3936	7.60993	6.83931	6.82842	7.90817
180	3.23162	3.81422	3.86646	5.25724	3.82755	3.94021	7.52231	7.57728	2.90345	7.24585	7.31496	7.4717	2.8942	3.26373	7.2951	7.40775	7.62653	6.83006	6.81917	7.90028
