# Supplementary material for: Electronic excited states of monobromosilylene molecules including the spin–orbit-coupling
Source: Royal Society of Chemistry journal article supplement (doi:10.1039/d3cp04970a), 2023-01-01
Supplement: d3cp04970a3.xlsx [file d3cp04970a3.xlsx]

## Sheet: Sheet1
PECs of the spin-orbit-coupled states along the H-Si bond length Corresponding data
RSS	#1	#2	#3	#4	#5	#6	#7	#8	#9	#10	#11	#12	#13	#14	#15	#16	#17	#18	#19	#20	#21	#22	#23	#24	#25	#26	#27	#28	#29	#30	#31	#32	#33	#34	#35	#36	#37	#38	#39	#40	#41	#42	#43	#44	#45	#46	#47	#48	#49
1.21	1.17961	2.73991	2.74019	2.74046	3.85612	5.5299	5.53126	5.53126	5.73534	5.73534	5.81398	5.82242	5.99303	6.0012	6.0997	6.3691	6.63658	6.99006	7.11605	7.11686	7.13374	7.33891	7.84613	7.84749	7.86055	8.26437	8.26655	8.26763	8.30872	8.33321	8.33675	8.34165	8.35172	8.35798	8.56152	8.95173	8.95173	9.00234	9.00642	9.02955	9.1803	9.195	9.22248	9.26493	9.26656	10.17	10.1705	10.1779	10.1828
1.26	0.75593	2.34399	2.34399	2.34453	3.44469	5.13179	5.13315	5.13315	5.30459	5.30459	5.37915	5.39847	5.56446	5.57262	5.67412	5.95086	6.22977	6.57373	6.65971	6.6608	6.68284	6.88475	7.38898	7.39034	7.4015	7.80504	7.80776	7.80858	7.8913	7.92178	7.92287	7.94191	7.94518	7.9498	8.14301	8.55825	8.55825	8.60696	8.61131	8.63281	8.79309	8.80696	8.83445	8.87581	8.87744	9.75446	9.75528	9.76263	9.76752
1.28	0.62069	2.21936	2.21936	2.2199	3.31353	5.00608	5.00744	5.00744	5.16581	5.16581	5.23873	5.26268	5.42677	5.43493	5.53779	5.81725	6.10025	6.43957	6.50951	6.51059	6.5359	6.73509	7.23278	7.23415	7.24421	7.6532	7.65565	7.65674	7.75824	7.78871	7.78899	7.81647	7.81865	7.82218	8.0094	8.43417	8.43444	8.48233	8.48669	8.50764	8.67199	8.6856	8.71281	8.75363	8.75553	9.62086	9.6214	9.62902	9.63392
1.3	0.50232	2.1116	2.11188	2.11215	3.1987	4.89696	4.89832	4.89859	5.0439	5.0439	5.11492	5.14404	5.30595	5.31411	5.41833	5.70051	5.98705	6.32066	6.37508	6.37644	6.40665	6.60148	7.08884	7.0902	7.09945	7.51796	7.52068	7.52204	7.64259	7.67007	7.6717	7.70926	7.71171	7.71361	7.89239	8.32723	8.32723	8.3743	8.37893	8.39934	8.56805	8.58084	8.60832	8.64859	8.6505	9.50303	9.50357	9.51119	9.51636
1.32	0.39974	2.01936	2.01963	2.02017	3.09938	4.80335	4.80499	4.80499	4.9375	4.9375	5.00662	5.04091	5.20064	5.20907	5.31438	5.59956	5.88909	6.21481	6.25535	6.25671	6.29426	6.48229	6.95659	6.95795	6.96502	7.39932	7.40204	7.4034	7.54572	7.56395	7.5664	7.62272	7.63143	7.63225	7.79116	8.23525	8.23552	8.28178	8.28641	8.306	8.47907	8.49186	8.51907	8.55907	8.5607	9.3999	9.40072	9.40833	9.4135
1.34	0.31157	1.94153	1.94153	1.94208	3.01366	4.7239	4.72553	4.72553	4.84499	4.84526	4.9122	4.9522	5.10975	5.11819	5.22486	5.51248	5.805	6.12011	6.14896	6.15032	6.19821	6.37671	6.83414	6.83577	6.84012	7.29592	7.29864	7.30054	7.46898	7.47742	7.47959	7.55252	7.56776	7.56885	7.70381	8.1577	8.1577	8.20314	8.20804	8.22709	8.40451	8.41675	8.44396	8.48342	8.48532	9.31037	9.31092	9.31881	9.32398
1.36	0.23674	1.8765	1.87677	1.87704	2.94073	4.65696	4.65886	4.65886	4.76553	4.7658	4.83084	4.87655	5.03193	5.04036	5.14812	5.43847	5.73317	6.03521	6.05426	6.05616	6.11766	6.28284	6.71849	6.72039	6.72339	7.20721	7.20993	7.21183	7.40367	7.40911	7.41129	7.48884	7.5049	7.50626	7.6298	8.09266	8.09294	8.13729	8.14219	8.16069	8.34301	8.35498	8.38192	8.42111	8.42301	9.23282	9.23337	9.24153	9.2467
1.38	0.17415	1.82343	1.82371	1.82425	2.87924	4.60199	4.60362	4.60362	4.69804	4.69804	4.7609	4.81315	4.96608	4.97424	5.08363	5.37642	5.67303	5.95848	5.97099	5.9729	6.05154	6.20039	6.61019	6.61209	6.61427	7.13183	7.13428	7.13673	7.34925	7.3536	7.35551	7.43442	7.44966	7.45102	7.56776	8.0396	8.0396	8.08314	8.08831	8.106	8.29348	8.30491	8.33212	8.37049	8.37267	9.16615	9.16697	9.17513	9.1803
1.4	0.12245	1.78126	1.78153	1.78207	2.82835	4.55736	4.55927	4.55954	4.64117	4.64145	4.70185	4.76063	4.91111	4.91955	5.0303	5.32527	5.62323	5.8899	5.89752	5.89943	5.9982	6.12746	6.50869	6.51059	6.51196	7.0687	7.07088	7.0736	7.30489	7.3087	7.31061	7.38979	7.40422	7.40585	7.51687	7.99715	7.99715	8.0396	8.04504	8.06192	8.25512	8.26573	8.29321	8.33104	8.33321	9.10955	9.11037	9.11853	9.12398
1.42	0.08136	1.74915	1.74942	1.74969	2.78672	4.52253	4.52444	4.52471	4.5941	4.59437	4.65233	4.71845	4.86621	4.87465	4.98676	5.28391	5.58296	5.82922	5.83303	5.83521	5.95603	6.06406	6.41345	6.41535	6.41644	7.01618	7.01836	7.02162	7.27034	7.2736	7.27578	7.35496	7.3683	7.36993	7.47605	7.96423	7.9645	8.00559	8.0113	8.02763	8.22627	8.23661	8.26437	8.30138	8.30355	9.06193	9.06275	9.07119	9.0769
1.44	0.04925	1.72602	1.72629	1.72656	2.75406	4.49641	4.49804	4.49886	4.55627	4.55655	4.61178	4.68553	4.83029	4.83873	4.95247	5.2518	5.55112	5.77616	5.7767	5.77915	5.92365	6.00882	6.3242	6.32637	6.32692	6.974	6.97591	6.97945	7.24421	7.24748	7.24938	7.32857	7.34109	7.34245	7.44449	7.94028	7.94028	7.98055	7.98627	8.00205	8.20668	8.21675	8.2445	8.2807	8.28314	9.02248	9.02329	9.032	9.03772
1.46	0.02585	1.71105	1.71132	1.71187	2.72903	4.47763	4.47954	4.4809	4.52661	4.52716	4.57913	4.66104	4.80308	4.81152	4.92662	5.22785	5.5269	5.72772	5.7299	5.73044	5.90024	5.96092	6.24066	6.24311	6.24338	6.94053	6.94244	6.94625	7.22653	7.22925	7.23142	7.31034	7.32177	7.32313	7.42136	7.92423	7.92423	7.96314	7.9694	7.98409	8.19552	8.20478	8.2328	8.26845	8.2709	8.99037	8.99118	8.99989	9.00588
1.48	0.01034	1.7037	1.70398	1.70452	2.7108	4.46566	4.46756	4.47001	4.50484	4.50539	4.55382	4.64444	4.78349	4.79192	4.90839	5.21125	5.50976	5.68582	5.68881	5.69017	5.88473	5.91984	6.16283	6.16501	6.16555	6.91523	6.91686	6.92121	7.21564	7.21836	7.22054	7.29918	7.30952	7.31115	7.40612	7.91525	7.91552	7.95307	7.95933	7.97348	8.19171	8.20069	8.22872	8.26355	8.266	8.96479	8.96561	8.97431	8.98057
1.5	0.0019	1.70316	1.70343	1.70398	2.6991	4.45913	4.46076	4.46566	4.49097	4.49124	4.53478	4.63464	4.7707	4.77913	4.89723	5.20146	5.4986	5.64963	5.65316	5.65643	5.87603	5.88501	6.08991	6.09181	6.09317	6.89754	6.8989	6.90325	7.21156	7.21401	7.21619	7.29428	7.30408	7.30571	7.39796	7.91253	7.9128	7.94926	7.95579	7.96912	8.19471	8.20314	8.23144	8.26518	8.26818	8.94492	8.94574	8.95472	8.96125
1.52	0	1.70887	1.70915	1.70969	2.69311	4.45668	4.45804	4.46702	4.48444	4.48471	4.52172	4.63165	4.76444	4.77288	4.89233	5.19792	5.49316	5.61942	5.62296	5.6284	5.85589	5.87385	6.02188	6.02378	6.02596	6.88611	6.88747	6.8921	7.21319	7.21564	7.21782	7.29537	7.30462	7.30598	7.39633	7.91579	7.91606	7.95089	7.9577	7.97021	8.20396	8.21158	8.24042	8.27335	8.27634	8.92996	8.93105	8.9403	8.94683
1.54	0.00435	1.72003	1.7203	1.72085	2.69202	4.45668	4.4575	4.47355	4.48607	4.48607	4.5141	4.63437	4.76362	4.77233	4.89315	5.19955	5.49207	5.59412	5.59793	5.60582	5.83167	5.87684	5.95848	5.96011	5.96365	6.88067	6.88203	6.88693	7.22027	7.22244	7.22462	7.3019	7.31034	7.3117	7.40041	7.92395	7.92423	7.9577	7.96477	7.97647	8.21865	8.226	8.25484	8.28668	8.28995	8.91989	8.92098	8.93023	8.93731
1.56	0.01388	1.73636	1.73663	1.73717	2.69556	4.45886	4.4594	4.48444	4.49396	4.49423	4.5111	4.64253	4.76852	4.77696	4.89914	5.20635	5.49534	5.57343	5.57779	5.58867	5.81208	5.88065	5.89916	5.90106	5.91004	6.88067	6.88176	6.88693	7.2317	7.23387	7.23605	7.31279	7.32068	7.32204	7.4102	7.93647	7.93674	7.96885	7.97593	7.98708	8.23825	8.24505	8.27444	8.30519	8.30872	8.91363	8.91472	8.92452	8.93186
1.58	0.02857	1.75731	1.75731	1.75786	2.70291	4.46403	4.46403	4.49913	4.50512	4.50729	4.51382	4.65532	4.77777	4.78648	4.91002	5.21724	5.50132	5.55711	5.56201	5.5767	5.79657	5.84364	5.84582	5.84582	5.90405	6.8853	6.88638	6.89183	7.24748	7.24938	7.25156	7.32802	7.33537	7.33673	7.42463	7.95253	7.9528	7.98327	7.99089	8.00096	8.26246	8.26845	8.29865	8.32831	8.33185	8.91091	8.912	8.92207	8.92969
1.6	0.04762	1.78207	1.78207	1.78262	2.71352	4.47165	4.47165	4.51301	4.51709	4.52444	4.52716	4.67274	4.79165	4.80009	4.92526	5.23193	5.50922	5.54486	5.55003	5.57017	5.78269	5.79167	5.79602	5.79657	5.92011	6.894	6.89509	6.90081	7.2668	7.2687	7.27088	7.34653	7.3536	7.35496	7.4434	7.97185	7.97212	8.00096	8.00885	8.01811	8.29049	8.29621	8.32668	8.35498	8.35906	8.91091	8.91227	8.92234	8.93077
1.62	0.07075	1.81037	1.81065	1.81092	2.7274	4.48199	4.48226	4.5209	4.53804	4.5443	4.54675	4.69396	4.80934	4.81777	4.94431	5.24962	5.51738	5.5367	5.54187	5.57017	5.74269	5.74323	5.75004	5.77888	5.94106	6.90652	6.90761	6.91332	7.28938	7.29102	7.29319	7.36857	7.3751	7.37646	7.46599	7.99361	7.99389	8.0211	8.02926	8.03743	8.32206	8.32695	8.35825	8.38546	8.38981	8.91363	8.91499	8.92533	8.93431
1.64	0.09769	1.84194	1.84221	1.84248	2.74372	4.49478	4.49505	4.53042	4.5609	4.56661	4.56879	4.71873	4.83056	4.839	4.96662	5.27003	5.52337	5.53262	5.53752	5.5767	5.69643	5.69752	5.70759	5.77398	5.96555	6.92203	6.92312	6.92883	7.31442	7.31578	7.31796	7.39279	7.39905	7.40068	7.49238	8.01702	8.01756	8.0426	8.05103	8.05865	8.35661	8.36097	8.39308	8.41866	8.42355	8.91799	8.91962	8.93023	8.94003
1.66	0.12817	1.87622	1.8765	1.87677	2.76196	4.50893	4.50947	4.54185	4.58539	4.59029	4.59246	4.74648	4.85478	4.86349	4.99193	5.29234	5.52636	5.53343	5.53616	5.58758	5.65316	5.65452	5.6714	5.77208	5.99303	6.94053	6.94135	6.94734	7.34136	7.34272	7.3449	7.41918	7.42517	7.4268	7.52177	8.04151	8.04205	8.06518	8.07389	8.08069	8.39389	8.3977	8.43063	8.45458	8.46002	8.92343	8.92533	8.93649	8.9471
1.68	0.16191	1.91378	1.91378	1.91432	2.78128	4.52172	4.52226	4.55083	4.61342	4.61614	4.61668	4.77152	4.87791	4.88608	5.01587	5.31493	5.52772	5.53697	5.55031	5.60473	5.6167	5.6167	5.62405	5.77181	6.01807	6.9321	6.93264	6.93781	7.3634	7.36422	7.36639	7.44449	7.47252	7.47415	7.56476	8.066	8.06681	8.08777	8.09675	8.10246	8.4339	8.43716	8.4709	8.49267	8.49893	8.9169	8.91935	8.9305	8.94275
1.7	0.19783	1.95269	1.95269	1.95323	2.80332	4.53913	4.53967	4.5658	4.63872	4.64117	4.64172	4.80553	4.90784	4.91628	5.04689	5.34078	5.53316	5.54323	5.55956	5.57888	5.57888	5.58187	5.63956	5.77534	6.04882	6.95523	6.95605	6.96094	7.39496	7.39578	7.39769	7.47497	7.50218	7.50408	7.59932	8.08994	8.09076	8.10954	8.11879	8.12341	8.47471	8.47716	8.51254	8.5324	8.53948	8.92071	8.92343	8.93486	8.94873
1.72	0.23647	1.99351	1.99351	1.99405	2.82672	4.55709	4.55791	4.58158	4.66321	4.66539	4.66594	4.84172	4.9405	4.94866	5.08009	5.36744	5.53724	5.54296	5.54377	5.54405	5.55411	5.58568	5.66731	5.7816	6.08011	6.98026	6.98081	6.98598	7.42762	7.42843	7.43034	7.50626	7.53293	7.53483	7.63606	8.11198	8.11307	8.1294	8.13892	8.14273	8.51635	8.51825	8.55553	8.57322	8.58138	8.92261	8.92642	8.93785	8.9539
1.74	0.27728	2.03568	2.03568	2.03623	2.85066	4.57587	4.57641	4.59791	4.6858	4.68798	4.68825	4.87982	4.97478	4.98322	5.1152	5.39466	5.50976	5.51275	5.51303	5.55357	5.56554	5.60554	5.69888	5.79004	6.1114	7.00639	7.00693	7.01183	7.46109	7.4619	7.46381	7.5381	7.56422	7.56612	7.67443	8.1313	8.13212	8.14627	8.15579	8.15906	8.55825	8.55961	8.59961	8.61485	8.62465	8.92207	8.92669	8.93839	8.95744
1.76	0.31973	2.07922	2.07922	2.07977	2.87543	4.59464	4.59546	4.61478	4.70566	4.70757	4.70784	4.91982	5.01125	5.01968	5.15193	5.42187	5.48418	5.48636	5.48663	5.56745	5.58051	5.62976	5.73371	5.80038	6.14188	7.03333	7.03387	7.03904	7.49537	7.49619	7.49782	7.56993	7.59497	7.59715	7.71415	8.14573	8.14682	8.15879	8.16831	8.17049	8.59961	8.60043	8.64397	8.65648	8.66873	8.91744	8.92424	8.93595	8.95907
1.78	0.36409	2.12358	2.12358	2.12412	2.90046	4.61369	4.61451	4.63165	4.72145	4.72335	4.72362	4.96172	5.04907	5.05751	5.18975	5.44881	5.46377	5.46513	5.46541	5.58432	5.59847	5.65725	5.77045	5.81289	6.17317	7.06054	7.06135	7.06652	7.53129	7.53211	7.53347	7.60068	7.62463	7.62681	7.75497	8.15416	8.15552	8.16477	8.1743	8.17593	8.63907	8.63961	8.68778	8.6973	8.71336	8.90846	8.91826	8.92996	8.95826
1.8	0.41008	2.16875	2.16875	2.16929	2.9255	4.63247	4.63328	4.64852	4.7326	4.73424	4.73451	5.00472	5.08853	5.09696	5.22867	5.44745	5.44962	5.45017	5.47792	5.60364	5.61915	5.68772	5.80582	5.82759	6.20773	7.08802	7.08884	7.09428	7.56939	7.57129	7.57184	7.62953	7.6513	7.65402	7.7966	8.15416	8.15579	8.1626	8.17212	8.17321	8.67472	8.67499	8.72968	8.73594	8.75853	8.89431	8.90928	8.92125	8.95663
1.82	0.45715	2.21419	2.21419	2.21473	2.95053	4.65097	4.65206	4.66566	4.7375	4.73913	4.73913	5.0488	5.12907	5.13778	5.26867	5.43928	5.44092	5.44146	5.50622	5.62541	5.64228	5.7201	5.83902	5.84392	6.24692	7.11578	7.11659	7.12231	7.61102	7.61483	7.61483	7.65701	7.67606	7.67878	7.83878	8.14437	8.146	8.1509	8.15988	8.16042	8.70438	8.70438	8.76642	8.76914	8.80343	8.87581	8.90139	8.91336	8.9569
1.84	0.50559	2.25991	2.25991	2.26045	2.97529	4.66947	4.67029	4.68253	4.7356	4.73723	4.73723	5.09424	5.17098	5.17941	5.30948	5.43819	5.43955	5.44037	5.53507	5.64935	5.66759	5.75385	5.86215	5.8714	6.28882	7.1438	7.14462	7.15006	7.65619	7.65919	7.65919	7.68477	7.70273	7.70572	7.8815	8.12314	8.12532	8.12804	8.13675	8.13702	8.72533	8.72533	8.79091	8.79145	8.84805	8.8554	8.90384	8.91445	8.9637
1.86	0.55484	2.30589	2.30589	2.30644	2.99978	4.68743	4.68825	4.69913	4.72689	4.72825	4.72852	5.1405	5.2137	5.22241	5.35057	5.44418	5.44554	5.44636	5.56473	5.67548	5.69534	5.7884	5.88201	5.9046	6.33182	7.17156	7.17265	7.17755	7.6981	7.69892	7.69973	7.71742	7.73674	7.73946	7.92395	8.09103	8.09348	8.09457	8.10273	8.10273	8.73812	8.73812	8.7988	8.7988	8.8369	8.89241	8.92424	8.93159	8.97976
1.88	0.60491	2.35161	2.35161	2.35215	3.02373	4.7043	4.70512	4.71138	4.71274	4.71464	4.71628	5.18758	5.25751	5.26622	5.39221	5.45697	5.45833	5.45969	5.59493	5.70351	5.72527	5.82324	5.90378	5.93916	6.37481	7.19931	7.2004	7.20421	7.72749	7.72966	7.73157	7.76341	7.78001	7.78245	7.9664	8.0494	8.05185	8.05212	8.05974	8.05974	8.74655	8.74655	8.79853	8.7988	8.82411	8.93595	8.95771	8.96152	9.00506
1.9	0.65579	2.39705	2.39705	2.39759	3.04686	4.68961	4.69015	4.69043	4.72362	4.72498	4.73288	5.23547	5.30187	5.31085	5.43384	5.47602	5.47711	5.47901	5.62595	5.73317	5.75684	5.85752	5.92718	5.97562	6.41753	7.22653	7.22761	7.23034	7.75116	7.75334	7.75579	7.81538	7.82926	7.83144	8.00042	8.00205	8.00423	8.00749	8.01049	8.0113	8.75499	8.75499	8.79934	8.79962	8.81894	8.97812	8.99499	8.9969	9.03554
1.92	0.70722	2.44195	2.44195	2.44249	3.06944	4.66294	4.66376	4.66376	4.74131	4.7424	4.74947	5.28363	5.34676	5.35629	5.4752	5.49996	5.50105	5.50377	5.65779	5.76419	5.79004	5.89072	5.95195	6.01399	6.45998	7.25292	7.25401	7.25564	7.77075	7.77239	7.77538	7.86899	7.88069	7.88286	7.94708	7.9479	7.95307	7.95878	7.95933	8.04885	8.7656	8.7656	8.80451	8.80451	8.8203	9.01731	9.032	9.03227	9.06738
1.94	0.7592	2.4863	2.4863	2.48658	3.09094	4.63274	4.63328	4.63355	4.75873	4.75981	4.76635	5.33234	5.39248	5.402	5.51575	5.52826	5.52908	5.53371	5.69044	5.79684	5.82514	5.92201	5.97861	6.05453	6.50216	7.2785	7.27959	7.28013	7.78518	7.78545	7.78926	7.8913	7.89184	7.89647	7.90028	7.90218	7.93239	7.9411	7.9411	8.08804	8.77866	8.77866	8.81322	8.81349	8.8271	9.05241	9.06493	9.06574	9.09758
1.96	0.81117	2.52957	2.52957	2.53011	3.11162	4.59981	4.60036	4.60036	4.77641	4.7775	4.78322	5.38132	5.43819	5.44826	5.55439	5.5601	5.56092	5.56935	5.72391	5.83085	5.8616	5.95086	6.00637	6.09753	6.54379	7.30326	7.30381	7.30462	7.78518	7.78817	7.79062	7.8347	7.83497	7.85511	7.85946	7.86273	7.986	7.99389	7.99498	8.1245	8.79309	8.79309	8.82465	8.82519	8.83717	9.08098	9.09187	9.0935	9.12262
1.98	0.86369	2.57229	2.57229	2.57284	3.13121	4.56525	4.5658	4.5658	4.79356	4.79465	4.79982	5.4303	5.48418	5.49479	5.59357	5.59711	5.59793	5.60963	5.75874	5.86596	5.89916	5.97752	6.03576	6.1427	6.58461	7.32639	7.32748	7.32857	7.75769	7.76123	7.76205	7.77865	7.77865	7.83851	7.84259	7.84586	8.04205	8.04804	8.0494	8.15716	8.80832	8.80832	8.83771	8.83853	8.84941	9.10003	9.1101	9.11227	9.13976
2	0.91594	2.61365	2.61365	2.6142	3.14972	4.53015	4.53069	4.53069	4.81097	4.81179	4.81641	5.47901	5.53044	5.54133	5.6284	5.62976	5.63058	5.64963	5.79466	5.90242	5.93834	6.00174	6.06623	6.18977	6.62461	7.34816	7.35034	7.3517	7.71143	7.71334	7.71497	7.72313	7.72313	7.83933	7.84286	7.84504	8.08885	8.09294	8.09457	8.18355	8.82356	8.82356	8.85159	8.85268	8.86302	9.10629	9.11581	9.11826	9.14493
2.05	1.04709	2.71216	2.71216	2.7127	3.18836	4.44199	4.44226	4.44253	4.85315	4.85397	4.85778	5.5982	5.64337	5.65534	5.69643	5.6967	5.69752	5.75221	5.88963	5.99848	6.03984	6.0578	6.14787	6.31195	6.71931	7.39905	7.40422	7.40558	7.58436	7.5849	7.58789	7.59116	7.59143	7.83905	7.84123	7.84259	8.18573	8.22219	8.22246	8.22382	8.85622	8.85649	8.8886	8.88996	8.90356	9.04098	9.05404	9.05622	9.08778
2.1	1.17662	2.80168	2.80168	2.80223	3.21339	4.356	4.35627	4.35627	4.89587	4.89669	4.89995	5.71847	5.75983	5.76228	5.76364	5.76364	5.77507	5.85752	5.99113	6.10242	6.11412	6.14759	6.23685	6.43413	6.80557	7.44775	7.44993	7.45156	7.46408	7.46435	7.46762	7.46898	7.4698	7.82354	7.8249	7.82545	8.06817	8.34546	8.34627	8.34736	8.79907	8.79907	8.84969	8.84996	8.88941	8.91282	8.95146	8.95146	8.9988
2.15	1.30451	2.8825	2.88277	2.88305	3.24033	4.27273	4.273	4.273	4.94186	4.94295	4.94567	5.82242	5.85888	5.87222	5.89507	5.89562	5.89698	5.95984	6.08963	6.15467	6.20556	6.25345	6.32773	6.56066	6.88802	7.34653	7.34653	7.34898	7.35034	7.35088	7.48939	7.48993	7.49184	7.82109	7.82218	7.82218	8.04178	8.44396	8.44424	8.4456	8.66927	8.66927	8.74166	8.74166	8.8037	8.81975	8.87826	8.88179	8.94574
2.2	1.42996	2.95407	2.95434	2.95488	3.26401	4.19246	4.19246	4.19246	4.99247	4.99356	4.99601	5.93535	5.96963	5.98405	6.01671	6.01725	6.01889	6.06378	6.15657	6.21916	6.31195	6.36338	6.42297	6.68529	6.96285	7.23768	7.23823	7.23959	7.24176	7.24204	7.5234	7.52367	7.52558	7.81837	7.81892	7.81973	8.02872	8.51743	8.51798	8.51961	8.58383	8.58383	8.65893	8.65893	8.72206	8.7403	8.80016	8.80315	8.86955
2.25	1.55268	3.01638	3.01665	3.01693	3.28333	4.11518	4.11518	4.11518	5.04744	5.04826	5.0507	6.00963	6.03929	6.05263	6.13127	6.13345	6.13508	6.16256	6.18841	6.31794	6.40991	6.46461	6.51495	6.80502	7.02652	7.13727	7.13754	7.13918	7.14108	7.14135	7.54599	7.54762	7.55034	7.8132	7.81348	7.81484	8.01892	8.43471	8.43961	8.44043	8.51036	8.51036	8.59798	8.59798	8.64968	8.69268	8.73812	8.73975	8.79907
2.3	1.6716	3.06972	3.06999	3.07053	3.29884	4.04143	4.04171	4.04171	5.10676	5.10758	5.10948	6.07739	6.07821	6.07875	6.15413	6.18569	6.20338	6.21127	6.26569	6.41889	6.5223	6.57971	6.61808	6.91496	7.04584	7.04611	7.04775	7.04965	7.04992	7.08612	7.56422	7.56585	7.5683	7.80558	7.80586	7.80694	8.00831	8.41838	8.42165	8.42192	8.44424	8.44424	8.54301	8.54328	8.58356	8.64397	8.67934	8.68043	8.73349
2.35	1.78643	3.11516	3.11516	3.1157	3.31081	3.97232	3.97232	3.97259	5.16907	5.16962	5.17179	6.1163	6.11712	6.11766	6.2295	6.26297	6.29481	6.31358	6.36447	6.51903	6.62543	6.68529	6.71577	6.96285	6.96312	6.96475	6.96666	6.96693	7.02217	7.13727	7.57238	7.57429	7.57592	7.79633	7.7966	7.79769	7.9977	8.38165	8.38328	8.38328	8.38328	8.38437	8.49186	8.49186	8.52288	8.59471	8.6241	8.62574	8.67444
2.4	1.89718	3.15325	3.15325	3.1538	3.32006	3.90783	3.90783	3.90783	5.23329	5.23411	5.23601	6.14896	6.15004	6.15032	6.24256	6.36801	6.40012	6.42025	6.46107	6.61672	6.72502	6.78733	6.81182	6.88802	6.88856	6.88938	6.8921	6.89237	7.12557	7.18217	7.57021	7.57211	7.57265	7.78681	7.78708	7.78817	7.98708	8.32369	8.32478	8.32532	8.32723	8.32723	8.42192	8.42219	8.47117	8.51825	8.55689	8.57948	8.63472
2.45	2.0033	3.18482	3.18509	3.18564	3.32686	3.84769	3.84796	3.84796	5.29887	5.29969	5.30132	6.17617	6.17726	6.17726	6.25181	6.46896	6.50162	6.52338	6.55495	6.7106	6.81319	6.8189	6.82108	6.82135	6.82325	6.83251	6.88774	6.90679	7.21972	7.22462	7.55823	7.55905	7.56068	7.77647	7.77701	7.77783	7.97647	8.2728	8.2728	8.27389	8.2758	8.2758	8.35879	8.35906	8.42274	8.45185	8.49839	8.53975	8.59771
2.5	2.1048	3.21121	3.21121	3.21203	3.33149	3.79245	3.79272	3.79272	5.36445	5.36527	5.3669	6.19848	6.19957	6.19957	6.25862	6.56556	6.59903	6.62243	6.64529	6.75577	6.75795	6.75931	6.76203	6.76284	6.80611	6.9155	6.97972	6.99931	7.25102	7.31904	7.54	7.54082	7.54299	7.76613	7.7664	7.76722	7.96613	8.22627	8.22654	8.23063	8.23144	8.23199	8.30736	8.30763	8.37702	8.40015	8.44859	8.50056	8.55825
2.55	2.20113	3.23298	3.23326	3.23407	3.33475	3.74184	3.74184	3.74184	5.42949	5.43003	5.43166	6.21698	6.21807	6.21807	6.26352	6.65754	6.68747	6.7008	6.70244	6.70298	6.70461	6.71169	6.71849	6.73727	6.89101	7.00394	7.06761	7.08911	7.2785	7.40639	7.52177	7.52231	7.52612	7.75579	7.75606	7.75742	7.95661	8.18273	8.18273	8.19253	8.1928	8.19416	8.26165	8.26192	8.33457	8.35471	8.40369	8.4641	8.52097
2.6	2.29283	3.25122	3.25122	3.25203	3.33666	3.69558	3.69585	3.69585	5.49262	5.49316	5.49452	6.23222	6.23331	6.23331	6.26733	6.65237	6.65291	6.65373	6.65563	6.65563	6.74625	6.78244	6.80802	6.81836	6.9721	7.08856	7.15061	7.17591	7.32775	7.46463	7.50653	7.50735	7.51442	7.74599	7.74681	7.7479	7.94763	8.14246	8.14246	8.15879	8.15879	8.16069	8.22029	8.22056	8.29566	8.31389	8.3626	8.4309	8.48669
2.65	2.37936	3.26618	3.26618	3.26727	3.33775	3.65367	3.65394	3.65394	5.5533	5.55384	5.55548	6.24474	6.2461	6.2461	6.27032	6.60747	6.60828	6.60883	6.61128	6.61128	6.82924	6.86652	6.89373	6.89836	7.05128	7.16857	7.22843	7.25836	7.34	7.49265	7.49537	7.49646	7.55987	7.73728	7.73892	7.74082	7.93974	8.10545	8.10545	8.12831	8.12858	8.13076	8.18273	8.18301	8.26029	8.27689	8.32532	8.40097	8.45539
2.7	2.46073	3.27843	3.2787	3.27979	3.33802	3.61585	3.61612	3.61612	5.61126	5.61208	5.61344	6.25508	6.25671	6.25671	6.27304	6.56719	6.56801	6.56856	6.57128	6.57128	6.90761	6.94625	6.97292	6.97618	7.12584	7.24394	7.30109	7.33646	7.35061	7.48748	7.48803	7.48966	7.63306	7.72994	7.73239	7.73728	7.93293	8.07198	8.07198	8.1011	8.10137	8.10437	8.14845	8.14899	8.22818	8.24369	8.29158	8.3743	8.42736
2.75	2.53746	3.28877	3.28904	3.29013	3.33802	3.58183	3.58183	3.58211	5.66623	5.66677	5.66813	6.26352	6.26542	6.26569	6.27576	6.53128	6.53209	6.53236	6.53536	6.53536	6.98135	7.02108	7.04475	7.05292	7.19578	7.31469	7.35959	7.3683	7.40884	7.4834	7.4834	7.48667	7.68939	7.72395	7.72803	7.74817	7.92804	8.04151	8.04151	8.07661	8.07715	8.08069	8.11743	8.11797	8.19906	8.21376	8.26083	8.35036	8.40179
2.8	2.60903	3.29748	3.29748	3.29911	3.33748	3.55136	3.55136	3.55136	5.71738	5.7182	5.71929	6.27005	6.27304	6.27304	6.27875	6.49917	6.49998	6.50025	6.50325	6.50325	7.04992	7.09156	7.11169	7.12503	7.26108	7.36748	7.38136	7.42952	7.46544	7.48095	7.48095	7.49619	7.70626	7.71932	7.72586	7.79361	7.92504	8.01375	8.01375	8.05484	8.05538	8.05974	8.0894	8.09022	8.17267	8.18709	8.23308	8.32886	8.3792
2.85	2.67569	3.30455	3.30482	3.30645	3.33666	3.52387	3.52387	3.52415	5.76528	5.76582	5.76691	6.27494	6.27957	6.27957	6.28256	6.47032	6.47141	6.47168	6.4744	6.4744	7.11333	7.15714	7.17428	7.19278	7.32122	7.37973	7.44204	7.47524	7.47959	7.47986	7.48667	7.54653	7.70762	7.71633	7.7264	7.84613	7.92477	7.98872	7.98872	8.03606	8.03661	8.04232	8.06436	8.06518	8.14926	8.16314	8.20804	8.31063	8.35934
2.9	2.73774	3.31081	3.31081	3.31271	3.33584	3.49938	3.49938	3.49966	5.80936	5.8099	5.81099	6.27848	6.28501	6.28528	6.28692	6.44502	6.44583	6.4461	6.44882	6.44882	7.17183	7.21809	7.23251	7.25564	7.37619	7.39252	7.47769	7.47959	7.47986	7.49837	7.53538	7.59932	7.70708	7.7147	7.73184	7.89457	7.92722	7.96586	7.96586	8.02518	8.026	8.03362	8.04232	8.04423	8.12994	8.14355	8.18518	8.29974	8.34546
2.95	2.79515	3.31598	3.31598	3.31816	3.33503	3.47761	3.47761	3.47789	5.84963	5.85045	5.85154	6.28147	6.28991	6.29018	6.291	6.42216	6.42297	6.42325	6.42624	6.42624	7.22517	7.27469	7.28666	7.3136	7.40258	7.42952	7.47905	7.48041	7.48068	7.55034	7.57919	7.64068	7.70653	7.71415	7.74436	7.93457	7.93974	7.94545	7.94545	8.01783	8.01811	8.03688	8.04042	8.04695	8.12096	8.13321	8.16505	8.31417	8.35172
3	2.84794	3.32006	3.32033	3.32278	3.33394	3.45802	3.45829	3.45829	5.88664	5.88718	5.88827	6.2842	6.29426	6.29426	6.29508	6.40202	6.40284	6.40311	6.40583	6.40583	7.26843	7.3166	7.33129	7.35197	7.41456	7.47878	7.4981	7.49946	7.49973	7.59334	7.6151	7.66136	7.70354	7.71252	7.76041	7.92695	7.92695	7.95334	7.97429	8.00042	8.00042	8.02083	8.02545	8.03634	8.10464	8.11824	8.14682	8.30355	8.33947
3.05	2.89665	3.32387	3.32387	3.32686	3.33312	3.44088	3.44088	3.44115	5.92011	5.92065	5.92174	6.28692	6.2978	6.29807	6.29862	6.38406	6.38488	6.38515	6.38787	6.38787	7.29782	7.33891	7.36476	7.36803	7.42571	7.52449	7.54136	7.54299	7.54327	7.62599	7.64177	7.6717	7.70028	7.71143	7.78245	7.91062	7.91062	7.96994	7.983	7.98491	7.99062	8.0045	8.00913	8.03715	8.08885	8.106	8.13049	8.29022	8.32532
3.1	2.94101	3.32686	3.32686	3.3304	3.33203	3.42591	3.42591	3.42591	5.95031	5.95113	5.95222	6.28937	6.30134	6.30134	6.30161	6.36828	6.3691	6.36937	6.37209	6.37209	7.34	7.38626	7.40667	7.41673	7.43605	7.53891	7.53918	7.54082	7.56721	7.65946	7.67034	7.6796	7.69837	7.71796	7.82109	7.89565	7.89565	7.96831	7.96912	7.98164	7.98491	7.98981	7.9947	8.0494	8.07498	8.10137	8.11607	8.27825	8.31253
3.15	2.98182	3.32931	3.32931	3.33095	3.33367	3.41258	3.41258	3.41258	5.9778	5.97861	5.97943	6.29209	6.30406	6.30433	6.3046	6.3544	6.35522	6.35549	6.35794	6.35794	7.37673	7.42843	7.44476	7.44667	7.46109	7.53755	7.53782	7.53891	7.60395	7.67796	7.6815	7.69511	7.69756	7.73565	7.86137	7.88232	7.88232	7.95634	7.95634	7.97457	7.97674	7.98164	7.99171	8.05294	8.063	8.10328	8.10926	8.26763	8.3011
3.2	3.01883	3.32986	3.33149	3.33149	3.33639	3.40088	3.40115	3.40115	6.00256	6.0031	6.00419	6.29454	6.30651	6.30678	6.30705	6.34243	6.34297	6.34324	6.34569	6.34569	7.40803	7.45401	7.46844	7.47878	7.50054	7.53674	7.53728	7.5381	7.63579	7.68422	7.68585	7.6981	7.71334	7.76069	7.87035	7.87035	7.89838	7.94491	7.94518	7.96368	7.96668	7.97021	8.00396	8.04831	8.05294	8.09239	8.12505	8.25838	8.29076
3.25	3.0523	3.32877	3.33285	3.33285	3.33911	3.39081	3.39108	3.39108	6.02487	6.02542	6.02623	6.29726	6.30841	6.30896	6.30923	6.33182	6.33236	6.33263	6.33454	6.33454	7.43306	7.46354	7.4951	7.50381	7.52748	7.54327	7.54327	7.54816	7.65892	7.68966	7.6932	7.7049	7.7264	7.78218	7.85973	7.85973	7.9264	7.93511	7.93511	7.95389	7.96014	7.96232	8.01566	8.04096	8.04477	8.08341	8.14083	8.25022	8.28206
3.3	3.08251	3.32768	3.33367	3.33367	3.34129	3.38183	3.38265	3.38265	6.04474	6.04555	6.0461	6.29943	6.3095	6.31032	6.31032	6.32365	6.32392	6.32392	6.32501	6.32501	7.45673	7.47224	7.48612	7.48966	7.49374	7.55442	7.5547	7.60585	7.66	7.71551	7.72205	7.7332	7.73837	7.80341	7.85048	7.85048	7.92559	7.92586	7.93593	7.94518	7.95171	7.97919	8.026	8.03362	8.04232	8.07634	8.15335	8.24342	8.27471
3.35	3.10999	3.32659	3.33394	3.33394	3.34346	3.37448	3.37584	3.37584	6.0627	6.06351	6.06406	6.30188	6.3076	6.30896	6.30896	6.31658	6.31658	6.31875	6.31875	6.31903	7.47714	7.47959	7.4932	7.4932	7.49456	7.56204	7.56259	7.63089	7.663	7.73347	7.74708	7.7498	7.75579	7.81511	7.84205	7.84205	7.9177	7.9177	7.93076	7.93729	7.94409	7.99416	8.02681	8.0347	8.04641	8.07253	8.16423	8.23743	8.26818
3.4	3.13475	3.32523	3.33367	3.33367	3.34537	3.36822	3.37067	3.37067	6.07902	6.07984	6.08038	6.3027	6.30379	6.30406	6.30433	6.30896	6.30896	6.31821	6.31821	6.31848	7.48667	7.49075	7.49537	7.49565	7.49619	7.5781	7.57837	7.65429	7.67198	7.74273	7.76205	7.76205	7.76912	7.82735	7.83443	7.83443	7.91062	7.91062	7.9245	7.93021	7.93756	7.99906	8.02055	8.0396	8.05838	8.07498	8.17348	8.23226	8.26274
3.5	3.17666	3.32224	3.33095	3.33095	3.3489	3.3587	3.36414	3.36414	6.10705	6.10787	6.10814	6.29154	6.2929	6.2929	6.29671	6.29671	6.30814	6.32066	6.32066	6.32066	7.49701	7.49837	7.49946	7.50163	7.51279	7.63306	7.63306	7.69293	7.72313	7.7283	7.73103	7.75143	7.77647	7.82218	7.82218	7.86953	7.89946	7.9011	7.9128	7.91824	7.93048	7.99579	8.01076	8.03634	8.09022	8.10273	8.18872	8.22546	8.25403
3.6	3.2104	3.31897	3.32632	3.32632	3.3519	3.35271	3.36169	3.36169	6.13018	6.131	6.13127	6.28256	6.28392	6.28392	6.28746	6.28746	6.31141	6.32311	6.32311	6.32338	7.50109	7.50136	7.50272	7.51089	7.5264	7.66327	7.66354	7.72177	7.7264	7.72803	7.72939	7.77402	7.7947	7.81239	7.81239	7.8815	7.89103	7.89674	7.90382	7.90926	7.93076	7.99035	8.00341	8.02872	8.11933	8.12586	8.19552	8.22083	8.24886
3.7	3.23707	3.31571	3.32169	3.32169	3.34918	3.35462	3.36115	3.36115	6.14977	6.15059	6.15086	6.27576	6.27685	6.27685	6.28039	6.28039	6.3144	6.32556	6.32556	6.32556	7.50408	7.50408	7.50544	7.51932	7.53538	7.68531	7.68585	7.72667	7.72749	7.72966	7.74654	7.79171	7.80477	7.80477	7.80939	7.88014	7.88504	7.89511	7.89674	7.90246	7.93783	7.98572	7.99797	8.02246	8.14164	8.14464	8.19824	8.21756	8.24668
3.8	3.25829	3.31244	3.31761	3.31761	3.34727	3.35707	3.36169	3.36169	6.16664	6.16746	6.16773	6.27059	6.27168	6.27168	6.27494	6.27494	6.31712	6.32773	6.32773	6.32773	7.50653	7.50653	7.50789	7.52612	7.54136	7.70245	7.703	7.72558	7.7264	7.72858	7.76368	7.79905	7.79905	7.80531	7.82137	7.87715	7.88069	7.89157	7.89293	7.89729	7.94681	7.98246	7.99416	8.01756	8.1577	8.16015	8.19879	8.21566	8.24695
3.9	3.27516	3.30972	3.31435	3.31435	3.34618	3.35924	3.36251	3.36251	6.18134	6.18215	6.18243	6.26651	6.26787	6.26787	6.27113	6.27113	6.31903	6.32937	6.32937	6.32964	7.50844	7.50871	7.5098	7.53129	7.54544	7.71551	7.71606	7.72259	7.72341	7.72558	7.77701	7.79443	7.79443	7.81565	7.83144	7.87443	7.87769	7.88749	7.89076	7.8932	7.9547	7.98028	7.99144	8.01402	8.1694	8.17158	8.19879	8.21457	8.24913
4	3.28822	3.30782	3.31162	3.31162	3.34564	3.36115	3.36333	3.36333	6.19467	6.19549	6.19576	6.26379	6.26488	6.26488	6.26814	6.26814	6.32093	6.331	6.331	6.331	7.51034	7.51061	7.5117	7.53565	7.54844	7.71851	7.71905	7.72068	7.72531	7.7264	7.78708	7.79116	7.79116	7.82382	7.8396	7.87252	7.87579	7.88477	7.88858	7.89048	7.96123	7.97865	7.98981	8.0113	8.17811	8.17974	8.19852	8.21403	8.25267
4.1	3.29829	3.30618	3.30972	3.30972	3.34537	3.36305	3.36414	3.36414	6.20637	6.20719	6.20746	6.26161	6.2627	6.2627	6.26596	6.26596	6.32256	6.33236	6.33236	6.33236	7.51197	7.51197	7.51333	7.53891	7.55061	7.71334	7.71388	7.71579	7.7332	7.73375	7.78844	7.78844	7.7947	7.83007	7.84613	7.87144	7.8747	7.88259	7.88722	7.88831	7.9664	7.97756	7.98844	8.00913	8.18355	8.18654	8.19797	8.21376	8.25675
4.2	3.30482	3.30645	3.30836	3.30836	3.34537	3.36469	3.36469	3.36496	6.21671	6.21753	6.2178	6.26025	6.26134	6.26134	6.2646	6.2646	6.32392	6.33345	6.33345	6.33372	7.51333	7.51361	7.51469	7.54163	7.55225	7.7079	7.70844	7.71034	7.73892	7.73973	7.78681	7.78681	7.80069	7.83497	7.8513	7.87062	7.87416	7.88096	7.88613	7.88667	7.97049	7.97729	7.9879	8.00776	8.18682	8.19199	8.1977	8.21376	8.2611
4.3	3.30401	3.30727	3.30727	3.31244	3.34564	3.3655	3.3655	3.36605	6.22569	6.22651	6.22678	6.25916	6.26025	6.26025	6.26352	6.26352	6.32501	6.33454	6.33454	6.33454	7.51469	7.51469	7.51606	7.54381	7.55333	7.70273	7.703	7.7049	7.74354	7.74436	7.78518	7.78545	7.80531	7.83878	7.85538	7.87035	7.87388	7.87987	7.88531	7.88559	7.97375	7.97702	7.98736	8.00695	8.18899	8.19661	8.19743	8.21403	8.26491
4.4	3.30346	3.30645	3.30645	3.31734	3.34591	3.36605	3.36605	3.36741	6.23331	6.23413	6.23413	6.25835	6.25971	6.25971	6.2627	6.2627	6.32583	6.33535	6.33535	6.33535	7.51578	7.51578	7.51714	7.54544	7.55442	7.69783	7.6981	7.7	7.74735	7.7479	7.78436	7.78436	7.80885	7.84178	7.85865	7.87008	7.87416	7.87906	7.88477	7.88477	7.97647	7.97674	7.98708	8.00613	8.19063	8.19743	8.20015	8.2143	8.26818
4.5	3.30292	3.30591	3.30591	3.32115	3.34618	3.36659	3.36659	3.3685	6.2393	6.24011	6.24039	6.2578	6.25916	6.25916	6.26243	6.26243	6.32665	6.33617	6.33617	6.33617	7.5166	7.5166	7.51796	7.5468	7.55524	7.69375	7.69402	7.69592	7.75007	7.75062	7.78354	7.78354	7.81157	7.84422	7.8611	7.87008	7.87443	7.87851	7.88423	7.8845	7.97702	7.97838	7.98708	8.00586	8.19171	8.19743	8.20314	8.21457	8.2709
4.6	3.30265	3.30564	3.30564	3.32387	3.34646	3.36714	3.36714	3.36959	6.2442	6.24501	6.24501	6.25753	6.25889	6.25889	6.26188	6.26188	6.32746	6.33671	6.33671	6.33699	7.51742	7.51742	7.51878	7.54789	7.55578	7.69075	7.69102	7.69266	7.75225	7.75307	7.78327	7.78327	7.81402	7.84613	7.863	7.87008	7.8747	7.87824	7.88395	7.88423	7.97702	7.98028	7.98708	8.00559	8.1928	8.19743	8.20532	8.21484	8.27335
PECs of the spin-orbit-coupled states along the Si-Br bond length Corresponding data
RSS	#1	#2	#3	#4	#5	#6	#7	#8	#9	#10	#11	#12	#13	#14	#15	#16	#17	#18	#19	#20	#21	#22	#23	#24	#25	#26	#27	#28	#29	#30	#31	#32	#33	#34	#35	#36	#37	#38	#39	#40	#41	#42	#43	#44	#45	#46	#47	#48	#49
1.85	1.91514	3.56333	3.56333	3.56387	4.55954	6.50896	6.50923	6.50978	7.21074	7.21102	7.21537	7.23795	7.45456	7.89565	8.40668	8.40886	8.4241	9.0584	9.08806	9.08887	9.34629	9.37405	9.42521	9.4301	9.43718	9.45677	9.46167	9.52181	9.60371	10.0557	10.0562	10.0641	10.6326	10.7937	10.7942	10.7983	10.8018	10.8024	10.8489	10.853	10.8783	11.4095	11.425	11.4296	11.5023	11.5028	11.5085	12.1874	12.1874
1.9	1.3437	2.99488	2.99516	2.9957	3.99436	6.00555	6.00582	6.00637	6.57753	6.57808	6.58407	6.75958	6.92693	7.19959	7.57783	7.58109	7.60204	8.29185	8.34274	8.34519	8.5909	8.59689	8.82465	8.82792	8.83635	8.85676	8.8603	8.86737	9.06112	9.48507	9.48561	9.49541	9.99882	10.0584	10.0775	10.0962	10.2307	10.2312	10.2358	10.2399	10.2407	10.6878	10.6979	10.7022	10.739	10.7422	10.7512	11.4146	11.4146
1.92	1.15594	2.80658	2.80658	2.8074	3.80714	5.84038	5.84065	5.84119	6.3593	6.35984	6.36665	6.61754	6.75822	6.95441	7.28802	7.29156	7.31632	8.0113	8.06736	8.07008	8.30165	8.31689	8.6124	8.61621	8.62301	8.66356	8.66601	8.66982	8.89867	9.2916	9.29214	9.30221	9.71093	9.79202	9.81569	9.88508	10.0383	10.0388	10.0437	10.0481	10.0489	10.3996	10.4187	10.4279	10.484	10.4848	10.4856	11.1515	11.1518
1.94	0.98614	2.63842	2.63842	2.63896	3.63952	5.68908	5.68963	5.6899	6.15902	6.15957	6.16746	6.47223	6.61672	6.72611	7.02081	7.02462	7.05346	7.75007	7.80994	7.81293	8.02572	8.06192	8.42519	8.42927	8.4358	8.48342	8.48587	8.48859	8.75472	9.10983	9.11037	9.12125	9.47255	9.55337	9.57841	9.66684	9.85787	9.85841	9.86385	9.86848	9.8693	10.1419	10.1621	10.1787	10.2279	10.2339	10.235	10.8982	10.8984
1.96	0.8343	2.48848	2.48848	2.48902	3.4904	5.55248	5.5533	5.55357	5.97562	5.97616	5.98487	6.33046	6.49508	6.51332	6.77346	6.77754	6.81155	7.50708	7.57102	7.57429	7.76749	7.82545	8.25811	8.26246	8.26899	8.31716	8.32015	8.3226	8.62927	8.93894	8.93921	8.95146	9.25922	9.33704	9.36262	9.46004	9.69052	9.69133	9.69705	9.70195	9.70303	9.91909	9.93896	9.95583	9.98494	9.9912	9.99202	10.6557	10.656
1.98	0.69906	2.35569	2.35569	2.35623	3.35816	5.42949	5.4303	5.43058	5.80691	5.80772	5.81752	6.20365	6.3144	6.38433	6.54515	6.54923	6.58924	7.28149	7.34925	7.35279	7.52667	7.60667	8.10736	8.11171	8.11824	8.16967	8.17267	8.17511	8.52179	8.7773	8.77757	8.79118	9.05921	9.13323	9.15935	9.26684	9.53432	9.53487	9.5414	9.5463	9.54766	9.71718	9.73569	9.74167	9.76127	9.76181	9.76562	10.4258	10.4263
2	0.57906	2.23868	2.23868	2.23922	3.24196	5.31874	5.31955	5.31982	5.65208	5.65289	5.66378	6.091	6.12827	6.28311	6.33399	6.33835	6.38515	7.07224	7.14408	7.14789	7.30299	7.40394	7.97103	7.97566	7.98191	8.04314	8.04613	8.04831	8.43281	8.62329	8.62329	8.6388	8.86656	8.93567	8.96152	9.08534	9.38711	9.38765	9.39473	9.3999	9.40126	9.52616	9.53323	9.53868	9.54358	9.55664	9.57705	10.2073	10.2081
2.02	0.47375	2.13609	2.13637	2.13691	3.14074	5.21887	5.21969	5.22023	5.50949	5.51058	5.52282	5.95412	5.99167	6.13834	6.14351	6.19059	6.19821	6.87904	6.95468	6.95849	7.0951	7.21619	7.84749	7.85239	7.85756	7.93484	7.93783	7.94001	8.36505	8.47526	8.47526	8.49267	8.68016	8.74383	8.76941	8.91581	9.24752	9.24806	9.25568	9.26085	9.26248	9.3199	9.33459	9.33813	9.36752	9.38575	9.40725	9.99964	10.0005
2.04	0.3815	2.04711	2.04738	2.04793	3.05312	5.12962	5.13043	5.13098	5.37833	5.37915	5.39302	5.79113	5.90405	5.95848	5.96365	6.02678	6.10433	6.70135	6.77999	6.78407	6.90244	7.04203	7.73483	7.74	7.74409	7.84178	7.84477	7.84667	8.32015	8.3324	8.33485	8.35389	8.50165	8.5607	8.58573	8.75853	9.11418	9.11445	9.11826	9.1218	9.12833	9.13159	9.14248	9.14493	9.21758	9.23255	9.25241	9.80154	9.8029
2.06	0.3015	1.97065	1.97065	1.97146	2.97829	5.04989	5.0507	5.05125	5.25724	5.25833	5.27411	5.63874	5.79221	5.79766	5.82732	5.87004	6.02242	6.53889	6.6189	6.62298	6.72502	6.88121	7.63116	7.6366	7.63878	7.76041	7.76341	7.76531	8.19443	8.19498	8.21457	8.30627	8.33376	8.39008	8.41458	8.6124	8.93077	8.94792	8.95173	8.98765	8.98846	8.99635	9.00343	9.00397	9.0837	9.09404	9.112	9.61242	9.61405
2.08	0.23266	1.90561	1.90561	1.90616	2.91434	4.97696	4.97778	4.97859	5.14567	5.14676	5.16445	5.49615	5.63901	5.645	5.72636	5.76038	5.93943	6.39277	6.47059	6.47522	6.56338	6.73291	7.53157	7.53701	7.53864	7.68613	7.68858	7.69048	8.06436	8.06464	8.08641	8.17947	8.23444	8.25865	8.26219	8.47634	8.74492	8.76479	8.76914	8.86275	8.86329	8.87173	8.87826	8.8788	8.96125	8.96805	8.98329	9.43119	9.4331
2.1	0.17442	1.85119	1.85119	1.85173	2.85992	4.90921	4.91002	4.91084	5.04227	5.04309	5.06349	5.36255	5.49833	5.50459	5.59439	5.70296	5.85235	6.26297	6.33427	6.33889	6.41862	6.59604	7.42136	7.42707	7.42843	7.61538	7.61728	7.61946	7.9547	7.9547	7.97947	8.03851	8.09266	8.11634	8.18546	8.34818	8.56397	8.58682	8.59227	8.73948	8.7403	8.74928	8.75553	8.75608	8.84696	8.85213	8.86492	9.25731	9.25949
2.12	0.12599	1.80629	1.80656	1.80684	2.81502	4.84607	4.84689	4.84771	4.94621	4.9473	4.97016	5.23792	5.36881	5.37534	5.47302	5.65452	5.75983	6.14868	6.20882	6.21317	6.29018	6.46978	7.34571	7.35115	7.35333	7.54871	7.55007	7.55197	7.81783	7.81783	7.84395	7.90735	7.96287	7.98627	8.09212	8.226	8.39036	8.41539	8.42219	8.61839	8.61893	8.629	8.63526	8.63553	8.73975	8.74438	8.75472	9.09078	9.0935
2.14	0.08626	1.77064	1.77064	1.77119	2.77883	4.78757	4.78839	4.7892	4.85696	4.85805	4.88363	5.12173	5.24962	5.25642	5.36119	5.6167	5.65997	6.048	6.09317	6.0978	6.1778	6.35304	7.28313	7.28802	7.29183	7.48585	7.48612	7.48803	7.67579	7.67633	7.70245	7.78218	7.8396	7.86273	7.99117	8.10817	8.22763	8.25403	8.26301	8.49947	8.49975	8.51118	8.51743	8.51771	8.63716	8.64179	8.64968	8.93132	8.93486
2.16	0.05497	1.74316	1.74316	1.74371	2.7508	4.73288	4.73369	4.73505	4.77424	4.7756	4.8039	5.0137	5.13996	5.1473	5.25778	5.5533	5.59003	5.95712	5.98678	5.9914	6.0812	6.24501	7.20911	7.21374	7.21891	7.42517	7.42653	7.42762	7.5547	7.55578	7.58055	7.65701	7.71633	7.73919	7.88504	7.99225	8.08015	8.10817	8.11879	8.38274	8.38328	8.39553	8.40179	8.40233	8.53567	8.54056	8.54601	8.77894	8.78302
2.18	0.03129	1.7233	1.7233	1.72384	2.73012	4.68009	4.6809	4.68498	4.69941	4.70104	4.72988	4.91329	5.03955	5.04717	5.16227	5.45724	5.56037	5.87222	5.88881	5.89317	5.99902	6.14515	7.1253	7.12938	7.137	7.3683	7.36911	7.37673	7.45401	7.45592	7.4766	7.52585	7.58708	7.60912	7.77456	7.87742	7.95117	7.97947	7.99144	8.26872	8.26899	8.2826	8.28831	8.2894	8.43226	8.4377	8.4407	8.63308	8.63798
2.2	0.01442	1.71051	1.71051	1.71105	2.71624	4.61859	4.61886	4.639	4.64253	4.64417	4.66158	4.82022	4.9473	4.95546	5.07383	5.3601	5.53969	5.7914	5.79847	5.80283	5.93045	6.05236	7.03088	7.03441	7.04611	7.31524	7.31551	7.33728	7.37701	7.37782	7.38816	7.39061	7.44721	7.46816	7.66055	7.76395	7.83987	7.86899	7.88042	8.15716	8.1577	8.17185	8.17729	8.17865	8.32532	8.33185	8.33267	8.49403	8.49975
2.22	0.00435	1.70425	1.70425	1.70479	2.70835	4.55246	4.55246	4.59355	4.59682	4.60063	4.60335	4.73424	4.86267	4.87138	4.9922	5.2654	5.51357	5.71521	5.71548	5.71956	5.88473	5.96637	6.92883	6.93155	6.94734	7.24421	7.25428	7.25591	7.29102	7.30571	7.3234	7.32394	7.32449	7.3351	7.54299	7.6532	7.74409	7.77402	7.78436	8.04885	8.04913	8.06382	8.06872	8.07008	8.21566	8.22165	8.22355	8.36124	8.36777
2.24	0	1.7037	1.70398	1.70425	2.70617	4.48906	4.48933	4.53614	4.55791	4.56199	4.5628	4.65478	4.78539	4.7941	4.91655	5.17506	5.48636	5.63847	5.64282	5.64337	5.8548	5.88637	6.82815	6.83087	6.84393	7.15823	7.17129	7.17346	7.19469	7.22462	7.24449	7.24775	7.25401	7.26326	7.42381	7.54653	7.66028	7.69239	7.70136	7.94327	7.94355	7.95797	7.96259	7.96368	8.10409	8.11008	8.11443	8.23444	8.24178
2.26	0.00136	1.70887	1.70887	1.70942	2.70889	4.4292	4.42947	4.48117	4.52117	4.52797	4.52825	4.58321	4.7141	4.72335	4.84662	5.08934	5.45969	5.56772	5.5718	5.57616	5.81235	5.83466	6.72039	6.72257	6.73863	7.03088	7.09373	7.1068	7.12557	7.13156	7.14761	7.19904	7.2053	7.21401	7.30435	7.43823	7.5868	7.62109	7.62925	7.84069	7.84096	7.85429	7.85837	7.85892	7.99253	7.99797	8.00559	8.11389	8.12205
2.28	0.00762	1.71867	1.71894	1.71921	2.71624	4.37096	4.37096	4.42974	4.47818	4.50239	4.50267	4.52797	4.64634	4.65532	4.78077	5.0088	5.43221	5.50187	5.50568	5.51411	5.74323	5.82351	6.61237	6.61427	6.63277	6.90434	6.97128	6.9887	7.07741	7.07877	7.10163	7.15523	7.16258	7.16721	7.1917	7.33156	7.52177	7.55823	7.56612	7.74137	7.74164	7.75279	7.75552	7.75606	7.88259	7.88749	7.89838	7.99879	8.00804
2.3	0.01878	1.73336	1.73336	1.73391	2.72794	4.31192	4.31192	4.38185	4.41913	4.50131	4.50185	4.50239	4.56797	4.57804	4.716	4.93342	5.40146	5.44119	5.44445	5.45887	5.67874	5.82051	6.50542	6.50706	6.52828	6.78135	6.85019	6.86788	7.0336	7.0355	7.05727	7.0619	7.11931	7.12394	7.1419	7.22734	7.46327	7.50245	7.51034	7.64531	7.64558	7.65293	7.65374	7.65565	7.77538	7.78028	7.7947	7.8894	7.89946
2.32	0.03401	1.75214	1.75214	1.75268	2.74318	4.26212	4.26212	4.33722	4.36035	4.47654	4.47709	4.47736	4.5141	4.52471	4.66131	4.86295	5.365	5.38513	5.38785	5.41289	5.61888	5.82487	6.40039	6.40175	6.4257	6.66243	6.73318	6.7506	6.9438	6.99496	6.99577	7.01455	7.08448	7.08911	7.11088	7.12612	7.41102	7.45211	7.46027	7.55225	7.55279	7.55306	7.55442	7.5566	7.67252	7.67715	7.69511	7.78545	7.79606
2.34	0.05333	1.77473	1.77473	1.77527	2.76223	4.2145	4.2145	4.29559	4.3043	4.45586	4.45695	4.4575	4.46403	4.47518	4.61015	4.79764	5.32227	5.33343	5.33534	5.37615	5.56337	5.83521	6.2978	6.29916	6.32529	6.54787	6.62026	6.6374	6.83033	6.9555	6.95686	6.97319	7.0287	7.05346	7.05809	7.08448	7.36313	7.40585	7.41428	7.45347	7.45728	7.45864	7.46327	7.46327	7.5751	7.57973	7.60014	7.68694	7.69783
2.36	0.07619	1.80058	1.80085	1.80139	2.784	4.17014	4.17014	4.25259	4.25695	4.41722	4.4262	4.43981	4.44008	4.44117	4.56335	4.73668	5.27738	5.28527	5.28635	5.34459	5.51167	5.85045	6.19794	6.1993	6.2276	6.43767	6.51141	6.52855	6.71903	6.91087	6.91958	6.93155	6.94326	7.02598	7.03033	7.0619	7.31932	7.35251	7.35796	7.35905	7.36803	7.37211	7.37782	7.37945	7.48395	7.48857	7.5098	7.59361	7.60476
2.38	0.10231	1.82997	1.82997	1.83051	2.80849	4.12905	4.12905	4.20497	4.2213	4.37532	4.38566	4.42403	4.42403	4.4243	4.52035	4.68009	5.23329	5.24037	5.24037	5.3152	5.4635	5.86977	6.10134	6.10242	6.13263	6.33209	6.40692	6.42406	6.61073	6.83577	6.88257	6.88856	6.89564	7.00339	7.00747	7.04312	7.25809	7.26299	7.26326	7.27877	7.29347	7.29374	7.32285	7.32993	7.40177	7.40748	7.42408	7.50544	7.51633
2.4	0.1317	1.8618	1.8618	1.86235	2.83543	4.09096	4.09096	4.16198	4.18783	4.33749	4.34783	4.40879	4.40933	4.4096	4.48117	4.6273	5.19139	5.19737	5.19819	5.28663	5.4186	5.89262	6.00746	6.00854	6.04065	6.23005	6.30515	6.32365	6.50379	6.74978	6.84802	6.85291	6.85672	7.02326	7.02625	7.05482	7.12612	7.12857	7.15251	7.21428	7.21428	7.24013	7.27224	7.27687	7.32966	7.34081	7.34707	7.42326	7.43333
2.42	0.16354	1.89636	1.89636	1.89718	2.86454	4.0564	4.0564	4.12361	4.15681	4.30348	4.31409	4.39382	4.39491	4.39518	4.4458	4.57859	5.15166	5.1571	5.15846	5.25887	5.37697	5.9133	5.91684	5.92228	5.95167	6.13345	6.20964	6.2276	6.40338	6.67114	6.81264	6.81672	6.81863	7.00639	7.00992	7.02598	7.0336	7.03768	7.0804	7.13809	7.13809	7.20176	7.20993	7.21346	7.25483	7.2853	7.29537	7.34762	7.35769
2.43	0.18041	1.91459	1.91459	1.91514	2.87978	4.04116	4.04116	4.10701	4.14212	4.28824	4.29913	4.38511	4.38647	4.38675	4.42947	4.55546	5.13261	5.13805	5.13941	5.24527	5.3571	5.87276	5.87303	5.90841	5.93126	6.08664	6.16338	6.18134	6.3544	6.63305	6.79387	6.79795	6.79985	6.97809	6.98924	6.99224	7.00094	7.00149	7.07333	7.10135	7.10135	7.17455	7.17646	7.18326	7.21891	7.26408	7.2766	7.31306	7.32367
2.44	0.19783	1.93337	1.93337	1.93391	2.89529	4.02783	4.02783	4.09341	4.12797	4.27491	4.28579	4.37423	4.37613	4.37641	4.4145	4.53342	5.11411	5.11955	5.12091	5.23139	5.33833	5.82922	5.82977	5.86596	5.94405	6.0412	6.11766	6.13589	6.30597	6.59631	6.77509	6.77917	6.78135	6.93237	6.9438	6.94652	6.99305	6.99414	7.06543	7.06543	7.06952	7.13945	7.14135	7.16258	7.18326	7.24068	7.25591	7.28204	7.29374
2.45	0.21606	1.95242	1.95269	1.95323	2.91135	4.01694	4.01694	4.08307	4.11436	4.26375	4.27464	4.36062	4.36253	4.3628	4.40035	4.51192	5.09615	5.10132	5.10295	5.21778	5.3201	5.78677	5.78732	5.82405	5.95603	5.99793	6.07304	6.09181	6.25835	6.56094	6.75604	6.7604	6.76284	6.88611	6.89836	6.90108	6.98652	6.98761	7.03033	7.03033	7.06652	7.10571	7.1068	7.14081	7.14843	7.21319	7.2317	7.25537	7.26762
2.46	0.23456	1.97228	1.97228	1.97283	2.92767	4.00769	4.00769	4.07518	4.1013	4.25423	4.26511	4.34511	4.34702	4.34729	4.38729	4.49124	5.07873	5.0839	5.08553	5.2039	5.30241	5.74487	5.74541	5.78296	5.94732	5.97616	6.0295	6.04909	6.21181	6.52692	6.73645	6.74108	6.74434	6.8404	6.85427	6.85672	6.97836	6.97917	6.99795	6.99822	7.05945	7.07278	7.07686	7.11496	7.11795	7.18326	7.20476	7.23142	7.2434
2.48	0.2732	2.0131	2.0131	2.01364	2.96114	3.98783	3.98783	4.05694	4.07654	4.23436	4.24525	4.32117	4.32307	4.32334	4.36253	4.45233	5.04553	5.05043	5.05206	5.17642	5.26948	5.66378	5.66432	5.70296	5.86596	5.94514	5.96011	6.00664	6.1212	6.46325	6.69427	6.69971	6.70733	6.75196	6.77128	6.77318	6.92611	6.92611	6.96938	6.97074	7.0053	7.00938	7.04339	7.06707	7.07197	7.12013	7.15006	7.18326	7.19251
2.5	0.31375	2.05555	2.05555	2.05609	2.9957	3.96633	3.96633	4.03436	4.05368	4.21259	4.22348	4.30593	4.30919	4.30947	4.33994	4.41613	5.0137	5.01859	5.02023	5.14867	5.23901	5.58541	5.58595	5.62595	5.78568	5.8646	5.88174	6.0344	6.03603	6.40311	6.6423	6.64937	6.66788	6.67033	6.70216	6.70298	6.86271	6.86271	6.93292	6.93509	6.96312	6.96938	6.98571	7.0121	7.05782	7.06897	7.097	7.13156	7.13673
2.52	0.3562	2.09936	2.09936	2.0999	3.03108	3.94511	3.94511	4.01177	4.03218	4.19137	4.20225	4.29396	4.2994	4.29967	4.32035	4.38266	4.98349	4.98812	4.99002	5.12064	5.21071	5.5103	5.51085	5.55167	5.70895	5.78759	5.80528	5.95113	6.07304	6.34352	6.57699	6.58434	6.58896	6.63332	6.65128	6.65237	6.80148	6.80148	6.87632	6.87849	6.9174	6.94897	6.95087	6.95605	7.0053	7.04557	7.06543	7.07958	7.08176
2.54	0.39974	2.14453	2.14453	2.14507	3.06645	3.92524	3.92524	3.99055	4.01259	4.1715	4.18239	4.28171	4.29178	4.29178	4.30511	4.35192	4.95465	4.95927	4.96118	5.09179	5.18513	5.43819	5.43874	5.4801	5.63548	5.71412	5.73208	5.8714	6.11494	6.28556	6.50787	6.51522	6.51522	6.59631	6.60964	6.611	6.74298	6.74298	6.81999	6.82189	6.86108	6.89999	6.91087	6.92911	6.96775	6.99659	7.02924	7.03305	7.06353
2.56	0.44491	2.19079	2.19079	2.19133	3.10237	3.90701	3.90701	3.97096	3.99436	4.15355	4.16416	4.2681	4.2847	4.28525	4.2945	4.32362	4.92689	4.93152	4.93397	5.06268	5.16173	5.36881	5.36935	5.41153	5.56609	5.64391	5.66242	5.79521	6.15467	6.23522	6.44148	6.44692	6.44855	6.55958	6.57073	6.57236	6.6872	6.6872	6.76584	6.76801	6.80638	6.84611	6.86108	6.89727	6.93618	6.94897	6.98979	6.99849	7.05918
2.58	0.49117	2.23786	2.23786	2.23841	3.13829	3.89041	3.89041	3.95327	3.97722	4.13695	4.14756	4.2545	4.27708	4.27926	4.28661	4.29858	4.9005	4.9054	4.90757	5.03247	5.1405	5.30268	5.30295	5.3454	5.49969	5.57724	5.59602	5.72201	6.16447	6.21916	6.37889	6.38352	6.38706	6.52284	6.53291	6.53454	6.63386	6.63386	6.71441	6.71631	6.75332	6.79387	6.80938	6.85727	6.89482	6.90053	6.96747	6.977	7.05401
2.6	0.53851	2.28576	2.28576	2.2863	3.17394	3.8749	3.87517	3.93694	3.9617	4.12171	4.13205	4.24144	4.26484	4.27382	4.28035	4.28089	4.87519	4.88009	4.88254	5.002	5.12173	5.23901	5.23955	5.282	5.43683	5.51357	5.53262	5.65235	6.13753	6.24338	6.32012	6.3242	6.32991	6.48638	6.49563	6.49753	6.58298	6.58298	6.66516	6.66706	6.70271	6.7438	6.75822	6.814	6.84856	6.85264	6.95468	6.96366	7.04884
2.62	0.58668	2.33419	2.33419	2.33501	3.20904	3.86102	3.86102	3.92252	3.94728	4.1081	4.11817	4.23001	4.24552	4.26838	4.27219	4.27464	4.8507	4.85587	4.85859	4.97097	5.1054	5.1786	5.17887	5.22132	5.3767	5.45262	5.47248	5.58568	6.10787	6.25726	6.26406	6.26787	6.29318	6.45019	6.45889	6.46107	6.53454	6.53454	6.61808	6.62026	6.654	6.69563	6.70897	6.77019	6.80176	6.80611	6.94679	6.95577	7.04367
2.64	0.63566	2.38317	2.38317	2.38399	3.2436	3.84851	3.84851	3.90946	3.93395	4.09586	4.10565	4.21967	4.22538	4.26239	4.26538	4.26838	4.8273	4.83274	4.83546	4.93941	5.0907	5.12091	5.12118	5.16309	5.31955	5.39466	5.41534	5.52173	6.08147	6.20936	6.21263	6.21263	6.31658	6.41454	6.4227	6.42542	6.48828	6.48828	6.57291	6.57536	6.60692	6.64964	6.66135	6.72693	6.75604	6.76121	6.94244	6.95251	7.0385
2.66	0.68545	2.43243	2.43243	2.43324	3.27734	3.83708	3.83708	3.89749	3.9217	4.08443	4.09395	4.20634	4.21042	4.25423	4.25722	4.26076	4.80417	4.81043	4.81288	4.90784	5.06322	5.06567	5.08064	5.10758	5.26486	5.33887	5.36091	5.45996	6.05807	6.15195	6.15494	6.15794	6.34624	6.37971	6.38706	6.39277	6.4442	6.4442	6.52883	6.53209	6.56066	6.60529	6.61563	6.68475	6.71169	6.71795	6.94162	6.95577	7.02625
2.69	0.76165	2.5059	2.50617	2.50726	3.3236	3.77395	3.77422	3.82075	3.90538	4.04334	4.05232	4.18076	4.19001	4.30484	4.30729	4.30974	4.76879	4.77641	4.7805	4.8605	4.98649	4.98785	5.02458	5.06812	5.18731	5.25887	5.28363	5.37098	6.00882	6.03195	6.03467	6.06242	6.32719	6.33318	6.33481	6.38243	6.38243	6.40556	6.46243	6.46869	6.49073	6.54216	6.55032	6.62352	6.64801	6.65754	6.93319	6.95169	6.95713
2.7	0.78723	2.53066	2.53093	2.53202	3.33884	3.76633	3.76687	3.81313	3.90021	4.0379	4.0466	4.17287	4.18647	4.30076	4.30321	4.30566	4.75737	4.7658	4.76988	4.84526	4.96172	4.96336	4.99927	5.06485	5.16254	5.23329	5.25914	5.34268	5.98242	5.99712	5.99984	6.04746	6.31086	6.31712	6.31794	6.36256	6.36256	6.41726	6.44202	6.45291	6.46923	6.52202	6.52964	6.60447	6.6276	6.63822	6.91251	6.92802	6.93019
2.75	0.91594	2.65474	2.65474	2.6561	3.40959	3.74129	3.74184	3.78973	3.87762	4.01858	4.02674	4.13858	4.17531	4.28851	4.29123	4.29396	4.69913	4.71356	4.71736	4.77424	4.84934	4.85206	4.86703	5.05016	5.10758	5.119	5.14649	5.17941	5.87194	5.8763	5.8782	6.01535	6.23168	6.23739	6.23739	6.27059	6.27059	6.35005	6.35059	6.37427	6.42624	6.43195	6.50352	6.51522	6.53291	6.55032	6.7887	6.80584	6.80965
2.8	1.04601	2.77747	2.77774	2.7791	3.47027	3.72687	3.72714	3.77857	3.85939	4.00633	4.01368	4.11191	4.17069	4.27654	4.27981	4.28334	4.63383	4.65641	4.65886	4.71845	4.75383	4.76471	4.76471	4.95111	5.01968	5.04744	5.07329	5.11302	5.78487	5.78623	5.78813	6.00936	6.15794	6.16283	6.16311	6.18868	6.18868	6.26841	6.27005	6.28991	6.33916	6.34297	6.4344	6.44828	6.46325	6.57917	6.6755	6.69645	6.70026
2.85	1.17635	2.89774	2.89774	2.89964	3.52006	3.71816	3.71871	3.77503	3.84497	3.99953	4.00606	4.09205	4.17042	4.26157	4.26538	4.26947	4.56226	4.58648	4.58729	4.64961	4.67736	4.70267	4.70675	4.86403	4.93288	4.96063	4.96472	5.15901	5.71548	5.71548	5.71766	6.02025	6.09018	6.0948	6.09508	6.1163	6.1163	6.19494	6.19712	6.21426	6.25916	6.26215	6.36229	6.37291	6.39223	6.57563	6.59332	6.60311	6.64393
2.9	1.30587	3.01366	3.01366	3.01611	3.55952	3.71435	3.7149	3.7764	3.83327	3.99762	4.00279	4.07817	4.17232	4.2428	4.24688	4.25232	4.48988	4.50947	4.50947	4.5511	4.6458	4.66675	4.67138	4.78811	4.85669	4.87002	4.88335	5.22078	5.66106	5.66214	5.6635	6.02868	6.03195	6.03304	6.04637	6.05208	6.05208	6.12882	6.131	6.14623	6.18596	6.18841	6.29807	6.30624	6.32909	6.48774	6.51059	6.51767	6.59495
2.95	1.43431	3.12387	3.12414	3.12686	3.59054	3.71435	3.71463	3.78157	3.82456	4.00007	4.00415	4.07028	4.17368	4.22021	4.22457	4.233	4.41913	4.43301	4.43328	4.46049	4.61886	4.64607	4.65124	4.72553	4.78757	4.78947	4.81397	5.29533	5.62105	5.62242	5.6235	5.97317	5.97725	5.97725	5.99521	5.99521	6.06868	6.06977	6.08147	6.08501	6.1193	6.1212	6.24093	6.24746	6.27304	6.41182	6.43631	6.44365	6.51876
3	1.56057	3.227	3.22727	3.23081	3.6153	3.71762	3.71789	3.78864	3.81776	4.00688	4.0096	4.06728	4.17178	4.19572	4.19844	4.21722	4.3511	4.36171	4.36307	4.42239	4.58539	4.6341	4.64117	4.68471	4.73179	4.75274	4.76553	5.26785	5.59248	5.59412	5.5952	5.9231	5.92718	5.92718	5.9446	5.9446	6.01426	6.01616	6.0295	6.05834	6.06025	6.12283	6.19086	6.19576	6.22379	6.34651	6.37209	6.37971	6.45182
3.05	1.68302	3.32169	3.32197	3.32632	3.63571	3.72306	3.72333	3.79653	3.81259	4.01749	4.01885	4.06919	4.15844	4.17014	4.17069	4.20525	4.28661	4.29749	4.30021	4.36797	4.53995	4.62076	4.63328	4.67002	4.69124	4.70403	4.72009	5.31493	5.57289	5.57507	5.57588	5.8782	5.88228	5.88228	5.90024	5.90024	5.96528	5.96691	5.97943	6.0031	6.00474	6.14678	6.1514	6.16555	6.18542	6.291	6.31685	6.32529	6.39277
3.1	1.79568	3.40632	3.40632	3.41176	3.65367	3.73041	3.73041	3.80442	3.8085	4.03137	4.03164	4.07463	4.13341	4.13967	4.1462	4.19627	4.22756	4.2428	4.24525	4.31328	4.49042	4.59246	4.61287	4.66838	4.67328	4.67954	4.68308	5.39411	5.56092	5.56309	5.56391	5.83847	5.84256	5.84256	5.86106	5.86106	5.92092	5.92228	5.93453	5.95358	5.95521	6.1095	6.11331	6.14052	6.21181	6.24474	6.26977	6.27903	6.34107
3.15	1.83432	3.47897	3.47897	3.48387	3.67	3.73884	3.73912	3.78347	3.81204	4.04552	4.04688	4.06565	4.10402	4.10919	4.12144	4.17096	4.1764	4.21042	4.21341	4.26974	4.44171	4.55464	4.59138	4.62267	4.68852	4.69097	4.69206	5.47738	5.55548	5.55711	5.55792	5.805	5.80909	5.80909	5.82841	5.82841	5.88256	5.88364	5.89507	5.91031	5.91194	6.07821	6.08147	6.10868	6.13807	6.20637	6.22977	6.24011	6.29699
3.2	1.90371	3.54156	3.54156	3.54455	3.68415	3.74782	3.74782	3.76061	3.81857	4.0545	4.0545	4.06456	4.07681	4.08252	4.09967	4.10212	4.13014	4.13749	4.18838	4.24307	4.39491	4.51029	4.51736	4.58185	4.71301	4.7141	4.71437	5.54241	5.55194	5.55275	5.57262	5.77262	5.7767	5.77698	5.79793	5.79793	5.84636	5.84718	5.85834	5.87004	5.87194	6.05127	6.05399	6.08011	6.17426	6.19521	6.20664	6.25698	6.25726
3.3	2.08548	3.62183	3.6349	3.63517	3.70891	3.73095	3.76578	3.7666	3.82837	3.98347	3.98402	4.01558	4.02511	4.06293	4.07137	4.08933	4.11137	4.12416	4.14865	4.233	4.32851	4.45777	4.46103	4.51954	4.78839	4.78893	4.7892	5.53806	5.54323	5.54405	5.71711	5.72119	5.72174	5.74732	5.74732	5.74868	5.78432	5.78487	5.79494	5.80201	5.80364	6.00854	6.01127	6.03358	6.12365	6.13943	6.15304	6.19086	6.19113
3.4	2.27161	3.66592	3.69394	3.69449	3.73014	3.75354	3.7832	3.78429	3.83517	3.97613	3.97694	3.98157	4.03572	4.05613	4.05776	4.07953	4.12633	4.15708	4.16008	4.23463	4.32906	4.44416	4.44471	4.46375	4.7609	4.76118	4.76145	5.5269	5.5318	5.53316	5.6733	5.67738	5.67793	5.70813	5.70813	5.73507	5.73534	5.74405	5.7484	5.75004	5.92827	5.97562	5.97861	5.99712	6.04528	6.08501	6.09589	6.11168	6.14052
3.5	2.44794	3.69612	3.7315	3.73204	3.74837	3.77776	3.79844	3.7998	3.8398	3.94755	3.94837	3.95218	3.99708	4.01205	4.01259	4.03109	4.15681	4.18484	4.1881	4.23817	4.29178	4.40471	4.40525	4.41994	4.85641	4.85669	4.85696	5.51275	5.5182	5.51956	5.63956	5.64337	5.64391	5.6782	5.6782	5.69697	5.69725	5.70405	5.70704	5.70868	5.91657	5.95331	5.9563	5.97263	6.05263	6.06188	6.07929	6.10134	6.10215
3.6	2.61148	3.72061	3.7568	3.75735	3.76469	3.79653	3.8115	3.81286	3.84334	3.92361	3.9247	3.92769	3.96551	3.97749	3.97776	3.99273	4.18021	4.20661	4.20933	4.24253	4.2643	4.37369	4.37423	4.3862	4.95682	4.9571	4.95791	5.49752	5.50323	5.50486	5.61371	5.61697	5.61779	5.65561	5.65561	5.66813	5.66813	5.6733	5.67575	5.67657	5.80854	5.93807	5.94106	5.9563	6.02759	6.03494	6.05399	6.07358	6.07467
3.7	2.76087	3.74156	3.77558	3.77612	3.77912	3.81041	3.82211	3.82347	3.84606	3.90429	3.90565	3.90837	3.94102	3.95109	3.95136	3.96334	4.19736	4.22293	4.22538	4.24552	4.24715	4.34947	4.3511	4.36035	5.05261	5.05315	5.05424	5.48282	5.48935	5.49098	5.59384	5.59629	5.59738	5.63874	5.63874	5.64636	5.64663	5.6499	5.65208	5.65262	5.72038	5.92909	5.93154	5.94705	6.00746	6.01426	6.03467	6.05236	6.05344
3.8	2.89584	3.76007	3.79027	3.79109	3.79218	3.82129	3.83055	3.83191	3.84823	3.88932	3.89123	3.89313	3.92252	3.9315	3.93177	3.94102	4.20824	4.23491	4.23545	4.2379	4.25205	4.33096	4.33368	4.34103	5.1386	5.13914	5.14077	5.47003	5.47738	5.47901	5.57888	5.58051	5.58187	5.62622	5.62622	5.63031	5.63085	5.63248	5.63493	5.63493	5.6518	5.92473	5.92691	5.94269	5.99167	5.99848	6.02025	6.03657	6.03793
3.9	3.01557	3.7764	3.80225	3.80361	3.80388	3.83	3.83762	3.83871	3.85041	3.87817	3.88061	3.88198	3.90864	3.91708	3.91735	3.92443	4.21123	4.23545	4.24525	4.24742	4.25695	4.31763	4.32117	4.32661	5.21125	5.21234	5.21452	5.45969	5.46813	5.46949	5.56718	5.56826	5.5699	5.60201	5.61725	5.61725	5.61861	5.61969	5.61997	5.62269	5.62269	5.92419	5.92582	5.94215	5.9797	5.98678	6.01045	6.02542	6.0265
4	3.12033	3.79109	3.81259	3.81422	3.81449	3.83708	3.84334	3.84415	3.85259	3.87055	3.87327	3.87436	3.89885	3.90674	3.90701	3.91245	4.21014	4.24225	4.25368	4.25532	4.26157	4.30783	4.31219	4.31627	5.27057	5.27193	5.27547	5.45153	5.46132	5.46268	5.55874	5.55901	5.56092	5.56963	5.6099	5.61017	5.61071	5.61208	5.61208	5.6148	5.6148	5.92582	5.92691	5.94405	5.97127	5.97861	6.00392	6.0178	6.01861
4.1	3.2104	3.80388	3.82157	3.82347	3.82374	3.84306	3.84823	3.84878	3.85449	3.86565	3.86864	3.86946	3.89204	3.89939	3.89993	3.90374	4.20987	4.24987	4.26076	4.26239	4.26647	4.30157	4.3062	4.30919	5.31738	5.31901	5.32418	5.44554	5.45751	5.4586	5.55275	5.55275	5.55384	5.55493	5.60446	5.60446	5.60609	5.60718	5.60745	5.61044	5.61044	5.92882	5.92936	5.94732	5.96555	5.97371	6.00011	6.0129	6.01371
4.2	3.28605	3.81558	3.83027	3.83218	3.83218	3.84851	3.85259	3.85286	3.85667	3.8681	3.87	3.87055	3.88796	3.89123	3.89177	3.89476	4.20878	4.25722	4.2681	4.26974	4.27219	4.29885	4.30157	4.30375	5.35275	5.3552	5.36282	5.44173	5.4567	5.45751	5.54894	5.54949	5.55112	5.55411	5.60119	5.60119	5.60364	5.60473	5.60527	5.60799	5.60799	5.93235	5.93263	5.95167	5.96229	5.97154	5.99875	6.01072	6.01127
4.3	3.34863	3.82646	3.83817	3.8398	3.84007	3.85368	3.85667	3.85667	3.85939	3.8681	3.86946	3.87	3.88606	3.88932	3.89014	3.89204	4.21232	4.26484	4.27491	4.27627	4.27736	4.29695	4.30021	4.30157	5.37887	5.38187	5.39302	5.43983	5.45887	5.45915	5.54758	5.5484	5.55003	5.56881	5.6001	5.6001	5.6031	5.60391	5.605	5.60745	5.60745	5.93643	5.93643	5.95684	5.9612	5.97208	5.99902	6.01045	6.01072
4.4	3.40033	3.83735	3.84606	3.84769	3.84796	3.85912	3.86102	3.86129	3.86266	3.87082	3.87191	3.87218	3.88633	3.88987	3.89068	3.89177	4.21776	4.27273	4.28171	4.28307	4.28362	4.29722	4.30076	4.30185	5.39765	5.40091	5.41697	5.4401	5.46459	5.46459	5.54894	5.55003	5.55167	5.59656	5.60119	5.60119	5.60446	5.60554	5.60636	5.60908	5.60935	5.9416	5.9416	5.96229	5.9631	5.97453	6.00174	6.01235	6.01235
4.5	3.4485	3.85259	3.8583	3.85993	3.86048	3.87272	3.87463	3.87572	3.87599	3.88225	3.88279	3.88306	3.89014	3.8934	3.89422	3.89531	4.22484	4.28906	4.29668	4.29858	4.29913	4.30185	4.30593	4.30647	5.43166	5.44037	5.44581	5.47711	5.50078	5.50296	5.52364	5.52908	5.5299	5.61017	5.61044	5.61344	5.61425	5.61507	5.61806	5.61806	5.64255	5.95875	5.96065	5.96419	5.97589	5.97616	6.01453	6.01616	6.01807
4.6	3.50809	3.88742	3.89096	3.89204	3.89313	3.90347	3.90483	3.90647	3.90647	3.91164	3.91191	3.913	3.91926	3.92198	3.92279	3.92306	4.2564	4.32226	4.32933	4.3296	4.33096	4.33124	4.33396	4.33477	5.46296	5.47003	5.47629	5.51112	5.53207	5.53371	5.56255	5.5669	5.56799	5.63956	5.63956	5.64255	5.64364	5.64446	5.64745	5.64745	5.71385	5.98895	5.99059	5.99576	6.00854	6.00936	6.04419	6.04691	6.04882
PECs of the spin-orbit-coupled states along the H-Si-Br bond angle Corresponding data
H-Si-Br	#1	#2	#3	#4	#5	#6	#7	#8	#9	#10	#11	#12	#13	#14	#15	#16	#17	#18	#19	#20	#21	#22	#23	#24	#25	#26	#27	#28	#29	#30	#31	#32	#33	#34	#35	#36	#37	#38	#39	#40	#41	#42	#43	#44	#45	#46	#47	#48	#49
55	1.65554	2.96713	2.9674	2.96903	3.33394	5.04553	5.04798	5.04853	5.06894	5.07002	5.07247	5.65969	6.13508	6.23331	6.23494	6.35767	6.3661	6.82516	7.18244	7.18462	7.19061	7.2219	7.22761	7.23442	7.25782	7.25809	7.27251	7.4053	7.41809	7.42082	7.53265	7.63225	7.63334	7.63796	7.64449	7.64504	7.80586	8.50383	8.50737	8.53485	8.94302	8.96751	8.9705	9.59147	9.59147	10.1928	10.1983	10.1996	10.216
60	1.21444	2.80658	2.80713	2.80821	3.22618	4.67764	4.67845	4.68253	4.93315	4.93397	4.93669	5.52799	5.63983	5.72201	5.72419	5.87303	6.31631	6.41644	6.69726	6.69781	6.71495	6.8287	6.83278	6.84067	6.92149	7.2121	7.21483	7.21782	7.31904	7.31986	7.32476	7.52803	7.52912	7.53619	7.54191	7.54299	7.97865	7.98355	8.00913	8.08586	8.54138	8.54519	8.54927	9.20452	9.20452	9.7727	9.77814	9.78004	9.79691
65	0.85144	2.64359	2.64413	2.64522	3.1421	4.41341	4.41423	4.41994	4.84635	4.84771	4.84988	5.26268	5.33942	5.34323	5.47112	5.49915	5.92501	6.26297	6.2676	6.28447	6.40719	6.43876	6.57699	6.57971	6.58488	7.21129	7.21483	7.22027	7.23551	7.2404	7.24585	7.49918	7.50027	7.50789	7.51388	7.51524	7.61374	7.62055	7.6464	7.74545	8.18926	8.19416	8.19933	8.87717	8.87717	9.4301	9.43527	9.43827	9.45487
70	0.56273	2.46698	2.46726	2.46807	3.07108	4.26974	4.2711	4.27872	4.76444	4.76662	4.76825	4.98866	5.06594	5.07084	5.22431	5.47575	5.62813	5.94705	5.95412	5.97181	6.10134	6.35086	6.4608	6.46325	6.46869	7.18326	7.18462	7.18925	7.22707	7.22761	7.22952	7.3751	7.38218	7.40939	7.51361	7.52748	7.53429	7.53918	7.54027	7.54136	7.96314	7.9694	7.97484	8.62628	8.62655	9.17677	9.18139	9.1852	9.20126
72	0.46668	2.39324	2.39351	2.39433	3.04332	4.24089	4.24225	4.25069	4.73179	4.73478	4.73587	4.90431	4.9824	4.98785	5.13887	5.50649	5.5201	5.85045	5.85834	5.87194	6.00174	6.31984	6.44719	6.44964	6.45508	7.17156	7.17183	7.177	7.22979	7.23006	7.23251	7.31115	7.31904	7.34571	7.46299	7.54925	7.55197	7.55551	7.5615	7.56259	7.90491	7.91171	7.91661	8.54682	8.54682	9.09949	9.10357	9.10792	9.12343
74	0.38069	2.3195	2.3195	2.32031	3.01502	4.22538	4.22674	4.23681	4.69968	4.70349	4.70458	4.83274	4.9122	4.91791	5.06621	5.44853	5.50786	5.76936	5.77779	5.79412	5.92092	6.28501	6.44855	6.45155	6.45617	7.16204	7.16312	7.16802	7.22081	7.22244	7.22598	7.27415	7.28122	7.30626	7.41755	7.57565	7.57783	7.58163	7.58708	7.58789	7.86354	7.87089	7.87497	8.47771	8.47825	9.03499	9.0388	9.0437	9.05812
76	0.30504	2.24603	2.24603	2.24684	2.98618	4.2213	4.22266	4.23436	4.66893	4.6741	4.67492	4.77288	4.85397	4.86022	5.00553	5.38676	5.5152	5.70269	5.7114	5.72881	5.85752	6.24664	6.46189	6.4657	6.46923	7.15333	7.15687	7.15795	7.18843	7.19496	7.2053	7.27877	7.27959	7.29319	7.38381	7.60585	7.60749	7.61211	7.61592	7.61728	7.83769	7.84559	7.84858	8.41893	8.41947	8.98275	8.98629	8.99146	9.00506
78	0.23864	2.17419	2.17419	2.17473	2.95624	4.22674	4.2281	4.24171	4.64008	4.64716	4.6477	4.72417	4.80689	4.81342	4.95628	5.33397	5.525	5.6499	5.65833	5.67657	5.8099	6.20583	6.48529	6.48964	6.49209	7.14163	7.14462	7.15578	7.17346	7.17673	7.18598	7.28394	7.28476	7.29183	7.36068	7.63851	7.64014	7.64504	7.64721	7.64939	7.82654	7.83524	7.83688	8.36968	8.37022	8.9422	8.9452	8.95091	8.9637
80	0.18123	2.10426	2.10426	2.10507	2.92577	4.24008	4.24117	4.25749	4.61423	4.62294	4.62321	4.68526	4.77015	4.77696	4.91764	5.29071	5.53452	5.60963	5.61752	5.63711	5.77698	6.16311	6.51604	6.52148	6.52257	7.12884	7.13782	7.15632	7.16802	7.16884	7.17319	7.28857	7.28938	7.29483	7.34707	7.67279	7.67415	7.6796	7.67987	7.68286	7.82953	7.83851	7.83905	8.32831	8.32913	8.91227	8.91499	8.92125	8.93268
82	0.13252	2.03732	2.03732	2.03813	2.8942	4.25994	4.26103	4.28008	4.59192	4.60199	4.60226	4.6556	4.74322	4.75029	4.8888	5.25615	5.54078	5.58133	5.5884	5.6099	5.75711	6.11902	6.5525	6.55849	6.55876	7.12176	7.1351	7.15959	7.16421	7.16802	7.17129	7.29292	7.29347	7.29836	7.34136	7.7079	7.70953	7.71307	7.71524	7.71742	7.84477	7.85212	7.85511	8.29484	8.29593	8.89268	8.89458	8.90139	8.91173
84	0.09225	1.97364	1.97364	1.97419	2.86209	4.28498	4.28606	4.30838	4.57396	4.5843	4.58457	4.63355	4.72553	4.73288	4.86948	5.23003	5.54269	5.56473	5.57017	5.59466	5.74922	6.07494	6.59223	6.59767	6.59985	7.12095	7.13727	7.16421	7.1653	7.17129	7.1751	7.29646	7.29673	7.30163	7.3419	7.74354	7.74518	7.74735	7.75143	7.75279	7.87008	7.87579	7.88096	8.26791	8.26954	8.88207	8.8837	8.89105	8.89975
86	0.05932	1.9135	1.9135	1.91405	2.82944	4.31436	4.31518	4.34158	4.56063	4.57015	4.57042	4.61859	4.71628	4.72417	4.85886	5.21125	5.54133	5.55792	5.56173	5.58786	5.75221	6.0314	6.63386	6.63903	6.64257	7.12503	7.14462	7.16938	7.17319	7.17809	7.1819	7.29809	7.29836	7.30353	7.34789	7.77973	7.78164	7.78245	7.78654	7.7879	7.90273	7.90708	7.91443	8.24668	8.24886	8.88016	8.88125	8.88914	8.89649
88	0.03429	1.85718	1.85718	1.85772	2.79706	4.34729	4.34783	4.37858	4.5511	4.55927	4.55954	4.61042	4.71546	4.72335	4.85587	5.19955	5.54024	5.55928	5.56282	5.5865	5.76473	5.9895	6.67604	6.68039	6.68584	7.13292	7.1555	7.17863	7.18353	7.18761	7.19142	7.29728	7.29836	7.30381	7.35687	7.81647	7.8181	7.81865	7.82055	7.82246	7.94001	7.94409	7.9528	8.23008	8.23335	8.88533	8.88615	8.89458	8.9003
90	0.01605	1.80493	1.80493	1.80548	2.76522	4.38266	4.38321	4.41913	4.54512	4.55138	4.55192	4.60906	4.72199	4.73015	4.86022	5.19356	5.53833	5.56881	5.57289	5.59058	5.78568	5.94732	6.71686	6.72094	6.72801	7.1438	7.16938	7.19088	7.19605	7.20013	7.20312	7.29347	7.29592	7.30136	7.36803	7.85103	7.85239	7.85402	7.85484	7.85701	7.98028	7.98436	7.99389	8.21756	8.22192	8.89703	8.8973	8.90601	8.91064
92	0.00463	1.75649	1.75677	1.75704	2.73393	4.42049	4.42076	4.46267	4.54131	4.54648	4.54729	4.61451	4.73532	4.74403	4.87084	5.19302	5.54459	5.58704	5.59085	5.60391	5.81453	5.8899	6.75577	6.75958	6.76829	7.15632	7.18489	7.20394	7.21074	7.21537	7.21755	7.28639	7.29075	7.29673	7.37918	7.88123	7.88178	7.88858	7.8894	7.89212	8.02055	8.02518	8.03579	8.20777	8.21376	8.91336	8.91363	8.92288	8.92588
94	0	1.71241	1.71241	1.71296	2.70399	4.45995	4.46022	4.50838	4.53967	4.54403	4.54539	4.62621	4.75546	4.76417	4.88771	5.19683	5.49888	5.61208	5.61616	5.62296	5.85017	5.88609	6.79169	6.79495	6.80529	7.16884	7.19986	7.21646	7.22653	7.23333	7.2336	7.27551	7.2834	7.29075	7.38925	7.90735	7.90763	7.92042	7.92123	7.92559	8.05892	8.06436	8.07552	8.20015	8.20804	8.93377	8.93377	8.94302	8.9452
96	0.00136	1.67214	1.67241	1.67268	2.67515	4.50022	4.50022	4.5394	4.54321	4.54403	4.55899	4.64362	4.78186	4.79056	4.91002	5.20445	5.46677	5.64473	5.64854	5.65072	5.86106	5.89208	6.82353	6.82652	6.83849	7.18054	7.21292	7.22462	7.23959	7.24857	7.25428	7.26081	7.2785	7.28721	7.39769	7.92967	7.92994	7.94844	7.94899	7.95579	8.09239	8.09892	8.11117	8.19335	8.20423	8.95608	8.95608	8.96561	8.96669
98	0.00871	1.63622	1.63622	1.63676	2.64848	4.53206	4.53314	4.53967	4.5541	4.55437	4.60798	4.66675	4.81342	4.8224	4.93723	5.21452	5.43058	5.68255	5.68391	5.68718	5.83929	5.9397	6.85183	6.85455	6.86734	7.19006	7.21564	7.21945	7.24095	7.24449	7.26245	7.27714	7.28748	7.29537	7.40394	7.94763	7.94763	7.97212	7.97239	7.98164	8.11852	8.12613	8.14028	8.18654	8.20124	8.97894	8.97894	8.98874	8.98901
100	0.02177	1.60411	1.60438	1.60493	2.62372	4.53695	4.53859	4.5394	4.59301	4.59301	4.65968	4.69451	4.85043	4.85914	4.96907	5.22595	5.38976	5.71466	5.72881	5.73181	5.82623	5.99222	6.8774	6.87985	6.8921	7.19006	7.19142	7.19469	7.22272	7.25891	7.28068	7.30136	7.30707	7.31306	7.4083	7.96069	7.96069	7.99008	7.99008	8.00205	8.13566	8.14382	8.16151	8.17865	8.19933	9.00071	9.00071	9.01023	9.0105
102	0.04054	1.57636	1.57636	1.5769	2.60114	4.53559	4.53723	4.5375	4.63872	4.63872	4.71356	4.72716	4.89179	4.9005	5.00526	5.23683	5.34568	5.73561	5.77888	5.7816	5.83303	6.04909	6.89727	6.89972	6.91305	7.16448	7.16448	7.16721	7.22517	7.26571	7.28748	7.32558	7.33075	7.33592	7.41184	7.96831	7.96831	8.00151	8.00205	8.0162	8.14301	8.15062	8.16913	8.17375	8.19716	9.01976	9.01976	9.02874	9.02955
104	0.06449	1.55241	1.55241	1.55295	2.581	4.53124	4.5326	4.53287	4.68662	4.68689	4.7639	4.76852	4.9375	4.94594	5.04553	5.24418	5.30105	5.73888	5.83385	5.8363	5.86677	6.10977	6.91441	6.91686	6.93101	7.12775	7.12829	7.12965	7.23006	7.27306	7.2951	7.34871	7.35469	7.35932	7.4151	7.96994	7.96994	8.0064	8.00749	8.02328	8.1411	8.14763	8.15661	8.17729	8.19362	9.03445	9.03445	9.04316	9.04425
106	0.09361	1.53227	1.53254	1.53309	2.56331	4.52308	4.52416	4.52471	4.73696	4.73723	4.80471	4.82458	4.98676	4.99519	5.08962	5.23629	5.26649	5.73589	5.89344	5.89535	5.91657	6.17426	6.92965	6.93183	6.94679	7.08312	7.08394	7.08448	7.23469	7.27959	7.30163	7.36884	7.37728	7.38136	7.41945	7.96586	7.96586	8.00423	8.00586	8.023	8.13049	8.1362	8.14083	8.17212	8.18546	9.04343	9.04343	9.05187	9.0535
108	0.12762	1.51622	1.51622	1.51676	2.54807	4.50974	4.51083	4.51137	4.78947	4.78975	4.84961	4.88172	5.03955	5.04771	5.13724	5.18975	5.26295	5.73589	5.95684	5.95848	5.97535	6.24147	6.94326	6.94516	6.96067	7.03088	7.03115	7.03169	7.23904	7.28557	7.30789	7.38517	7.39769	7.4015	7.42626	7.95525	7.95525	7.99443	7.99661	8.01484	8.1128	8.11797	8.12124	8.15933	8.17212	9.04561	9.04588	9.05404	9.05568
110	0.16653	1.5037	1.50397	1.50452	2.53583	4.49069	4.49151	4.49233	4.84444	4.84444	4.89778	4.94023	5.09479	5.10349	5.12717	5.18812	5.26595	5.74405	6.02378	6.02569	6.03984	6.31195	6.9555	6.95713	6.96557	6.97047	6.97156	6.97863	7.24313	7.29102	7.3136	7.39633	7.41565	7.41918	7.43551	7.93865	7.93865	7.97783	7.98055	7.99879	8.08885	8.09402	8.09702	8.14028	8.15307	9.04071	9.04071	9.0486	9.05078
112	0.21007	1.49499	1.49527	1.49581	2.5263	4.46484	4.46593	4.46675	4.90159	4.90159	4.94948	4.99683	5.07057	5.15438	5.162	5.24227	5.25425	5.76255	6.09453	6.09589	6.10895	6.38461	6.90298	6.9038	6.90489	6.96747	6.96938	6.98761	7.24503	7.29401	7.31714	7.40449	7.43143	7.43469	7.44667	7.91552	7.91552	7.95497	7.95797	7.97647	8.0611	8.06654	8.06845	8.11715	8.1294	9.02792	9.02792	9.03554	9.03799
114	0.25824	1.48982	1.4901	1.49064	2.51977	4.43246	4.43328	4.43437	4.96091	4.96091	5.00472	5.01996	5.05642	5.21506	5.22295	5.22486	5.29942	5.79167	6.168	6.16936	6.18134	6.45917	6.8355	6.83604	6.83713	6.97727	6.9789	6.99931	7.24095	7.29238	7.31605	7.41156	7.44531	7.4483	7.45837	7.88667	7.88667	7.92749	7.93048	7.95035	8.0328	8.03552	8.0377	8.09321	8.103	9.00778	9.00806	9.01513	9.01785
116	0.31075	1.48846	1.48846	1.48901	2.51596	4.39301	4.39382	4.39491	4.96989	5.02268	5.02295	5.06268	5.08309	5.21941	5.27928	5.28635	5.35928	5.83031	6.24447	6.24583	6.25698	6.53536	6.76339	6.76366	6.76475	6.98598	6.98734	7.01074	7.23496	7.28938	7.31306	7.41864	7.45837	7.46109	7.4698	7.85239	7.85239	7.8962	7.89919	7.92259	7.9977	8.00776	8.00994	8.07253	8.07743	8.98084	8.98112	8.98792	8.99118
118	0.36735	1.49037	1.49064	1.49118	2.51515	4.34702	4.34783	4.34892	4.91138	5.0771	5.0869	5.0869	5.1239	5.25125	5.34513	5.35193	5.42214	5.87657	6.32311	6.32501	6.33508	6.61019	6.68148	6.68284	6.6842	6.99414	6.9955	7.02135	7.23306	7.28966	7.31306	7.42626	7.4717	7.47415	7.48177	7.8132	7.8132	7.86137	7.86354	7.89348	7.95661	7.98083	7.98518	8.05865	8.06028	8.94819	8.94873	8.95472	8.95853
120	0.42858	1.49581	1.49581	1.49635	2.51732	4.29532	4.29586	4.29722	4.85097	5.04662	5.15329	5.15329	5.18785	5.30704	5.41262	5.41942	5.48745	5.92854	6.40257	6.40583	6.41345	6.5857	6.59277	6.59441	6.69726	7.00203	7.00339	7.03088	7.23442	7.29238	7.31524	7.43497	7.48612	7.4883	7.49429	7.77021	7.77021	7.82191	7.82382	7.86001	7.91171	7.94572	7.95851	8.04096	8.04913	8.91064	8.91118	8.91662	8.92098
122	0.49389	1.50452	1.50452	1.50533	2.52222	4.23844	4.23899	4.24035	4.78866	5.00798	5.22159	5.22159	5.25479	5.37125	5.482	5.48854	5.55548	5.98569	6.45372	6.45753	6.46379	6.51631	6.52774	6.53699	6.77482	7.00911	7.0102	7.03904	7.23741	7.29646	7.31823	7.44367	7.50163	7.50354	7.50735	7.72341	7.72341	7.7781	7.77946	7.82109	7.86409	7.90355	7.92205	7.9996	8.00259	8.86901	8.87009	8.87445	8.87989
124	0.56328	1.51649	1.51676	1.51731	2.53011	4.17722	4.17776	4.17912	4.72444	4.96717	5.2918	5.2918	5.32418	5.43901	5.55248	5.5582	5.62622	6.04664	6.35495	6.35576	6.35685	6.60883	6.61264	6.62243	6.85373	7.01455	7.01591	7.04584	7.24149	7.30081	7.32122	7.45102	7.5185	7.52014	7.52177	7.67415	7.67415	7.73048	7.73184	7.77701	7.81402	7.85674	7.87769	7.95144	7.95334	8.82438	8.82574	8.829	8.83581
126	0.63647	1.53173	1.53173	1.53254	2.54073	4.11273	4.11327	4.11463	4.65886	4.92635	5.36336	5.36336	5.39602	5.50704	5.62214	5.62704	5.69888	6.10732	6.23304	6.23331	6.2363	6.71767	6.72121	6.72937	6.92992	7.01945	7.02081	7.05265	7.24639	7.30489	7.32394	7.45456	7.53592	7.53728	7.53755	7.623	7.623	7.68014	7.68204	7.72912	7.76232	7.80667	7.82899	7.90055	7.90191	8.7773	8.77948	8.78138	8.78955
128	0.71375	1.54996	1.55023	1.55078	2.55406	4.04579	4.04633	4.04769	4.59165	4.88608	5.43547	5.43575	5.47003	5.57153	5.68799	5.69235	5.77344	6.09834	6.11657	6.11685	6.1944	6.82353	6.82788	6.83468	6.99577	7.02407	7.02652	7.06625	7.25183	7.30898	7.32666	7.44694	7.54925	7.55197	7.55524	7.57347	7.57402	7.62898	7.63143	7.67932	7.70926	7.75497	7.77783	7.84776	7.84912	8.72832	8.73104	8.7324	8.74166
130	0.79484	1.57119	1.57146	1.572	2.56984	3.97722	3.97749	3.97885	4.52362	4.84716	5.50568	5.50568	5.5465	5.62514	5.7416	5.74514	5.84909	6.00909	6.02705	6.02841	6.25753	6.91305	6.91877	6.92911	7.02625	7.0336	7.03713	7.10299	7.25809	7.31279	7.32911	7.40286	7.51306	7.51306	7.55823	7.56368	7.57238	7.59116	7.59388	7.63252	7.65565	7.70218	7.72531	7.79416	7.79552	8.67825	8.6807	8.68315	8.69268
132	0.87974	1.59486	1.59513	1.59595	2.58671	3.90647	3.90701	3.90837	4.4545	4.80825	5.565	5.56527	5.62459	5.64691	5.76337	5.76555	5.92473	5.96528	6.00283	6.00746	6.32855	6.93754	6.96911	6.97047	7.00394	7.04475	7.06135	7.06543	7.26571	7.27387	7.31687	7.33102	7.45837	7.45837	7.51415	7.51578	7.5566	7.60068	7.60123	7.60313	7.6151	7.65021	7.67252	7.73973	7.74082	8.62546	8.62791	8.63172	8.64097
134	0.96845	1.62153	1.6218	1.62289	2.60794	3.83572	3.83653	3.83735	4.38484	4.7707	5.5748	5.57561	5.6031	5.70405	5.76555	5.76718	5.99086	5.99684	6.05508	6.06542	6.4042	6.51767	6.98815	6.98897	7.04911	7.0736	7.11496	7.1234	7.27768	7.31687	7.32748	7.33319	7.40313	7.40313	7.46082	7.4619	7.50816	7.54844	7.58762	7.60857	7.62572	7.63442	7.63687	7.68585	7.68694	8.57295	8.57458	8.58029	8.589
136	1.0607	1.65146	1.65173	1.65282	2.63379	3.76633	3.76714	3.76823	4.31681	4.73641	5.49452	5.49561	5.5016	5.78378	5.81643	5.81779	6.06514	6.06569	6.14297	6.15603	6.37372	6.48393	6.99659	6.99686	7.04557	7.14462	7.19088	7.20285	7.30081	7.32884	7.33836	7.34925	7.34925	7.37646	7.40993	7.40993	7.45701	7.50082	7.53946	7.56558	7.62708	7.62844	7.65402	7.66028	7.66272	8.52369	8.52533	8.53186	8.54002
138	1.15621	1.68411	1.68438	1.68547	2.66209	3.69803	3.69857	3.69966	4.25015	4.70321	5.36989	5.37153	5.37289	5.8597	5.8948	5.89616	6.11576	6.16147	6.24474	6.25862	6.28773	6.56665	7.0023	7.0023	7.04285	7.19551	7.25238	7.26789	7.29592	7.29592	7.33782	7.33945	7.34326	7.3732	7.37891	7.39578	7.42435	7.4717	7.49728	7.52694	7.57864	7.58082	7.68286	7.68885	7.68994	8.47662	8.47771	8.48505	8.49158
140	1.25499	1.71976	1.71976	1.72112	2.69311	3.63109	3.63163	3.63272	4.18457	4.67165	5.23193	5.23356	5.23384	5.91467	5.98106	5.98242	6.11113	6.26651	6.29073	6.35304	6.36529	6.65155	7.00584	7.00611	7.04149	7.22244	7.24367	7.24367	7.27469	7.28476	7.30299	7.31333	7.33864	7.34762	7.3868	7.39388	7.43905	7.48912	7.48939	7.52857	7.53891	7.54762	7.72096	7.72531	7.72858	8.43172	8.43226	8.43934	8.44396
142	1.35703	1.7584	1.7584	1.76003	2.72658	3.56578	3.56632	3.56741	4.12089	4.6409	5.09669	5.09778	5.09887	5.87303	6.06977	6.07059	6.09943	6.36828	6.39848	6.45753	6.46733	6.73699	7.00938	7.00938	7.04176	7.19306	7.19306	7.23605	7.24149	7.2453	7.28802	7.30054	7.30952	7.31796	7.3566	7.36993	7.44775	7.4649	7.46599	7.56313	7.57374	7.58653	7.75633	7.76232	7.76694	8.38872	8.38872	8.39553	8.39743
144	1.46207	1.80003	1.8003	1.80221	2.76277	3.50238	3.50292	3.50401	4.05939	4.61233	5.09315	5.09397	5.09533	5.77262	6.13644	6.13644	6.16147	6.34705	6.44991	6.45753	6.49182	6.80938	7.01319	7.01346	7.04394	7.14435	7.14435	7.19469	7.19496	7.24775	7.25129	7.2551	7.30109	7.31551	7.32285	7.34	7.42	7.42	7.45429	7.59306	7.60422	7.62272	7.76177	7.77021	7.7732	8.34682	8.34682	8.35308	8.35389
146	1.56982	1.84466	1.84493	1.84738	2.80141	3.44142	3.44197	3.44306	4.00007	4.5843	4.97968	4.9805	4.98213	5.66051	6.22351	6.22351	6.24311	6.43005	6.53454	6.5408	6.58053	6.88856	7.01863	7.0189	7.04802	7.09782	7.09782	7.1487	7.14925	7.2034	7.20966	7.2619	7.26408	7.28122	7.32258	7.34081	7.37456	7.37456	7.45864	7.59959	7.6113	7.63388	7.73864	7.75007	7.75116	8.30519	8.30546	8.31063	8.31308
148	1.68003	1.89228	1.89255	1.89554	2.84277	3.38292	3.38374	3.38455	3.9432	4.55709	4.85886	4.85941	4.86159	5.54568	6.31304	6.31304	6.32991	6.52094	6.62488	6.63005	6.66897	6.96394	7.02462	7.02489	7.05265	7.05428	7.05482	7.10544	7.10598	7.16149	7.16557	7.22163	7.23659	7.2785	7.32939	7.32993	7.33102	7.34952	7.46109	7.59061	7.60204	7.62844	7.70354	7.71824	7.71905	8.26518	8.26573	8.26954	8.27362
150	1.79241	1.94262	1.94262	1.94725	2.88686	3.32714	3.32795	3.32877	3.88932	4.53015	4.73886	4.73941	4.74267	5.4303	6.40284	6.40284	6.41808	6.61155	6.71359	6.71849	6.75713	7.00747	7.00747	7.03169	7.03469	7.03605	7.05754	7.06816	7.06979	7.12394	7.1253	7.18054	7.19632	7.28802	7.2883	7.29401	7.33864	7.35959	7.46218	7.57293	7.58354	7.61429	7.66463	7.68286	7.68504	8.22682	8.22763	8.2309	8.23552
152	1.90534	1.99541	1.99541	2.00357	2.93339	3.27435	3.27543	3.27598	3.83844	4.50267	4.62022	4.62076	4.62621	5.31574	6.49236	6.49236	6.50679	6.70135	6.79958	6.80393	6.84366	6.96856	6.96856	7.01537	7.01537	7.04965	7.05999	7.0619	7.08067	7.09836	7.10625	7.14244	7.1585	7.24802	7.2483	7.31224	7.34843	7.37156	7.46054	7.5517	7.55878	7.59551	7.62599	7.64885	7.65211	8.1909	8.19171	8.19443	8.19961
154	2.01283	2.05092	2.05092	2.06997	2.98182	3.22455	3.22618	3.22645	3.79055	4.4662	4.50294	4.50348	4.52008	5.202	6.58053	6.58053	6.59468	6.7887	6.87904	6.88257	6.9253	6.93183	6.9321	6.98271	6.98326	7.02679	7.04584	7.07142	7.0736	7.11224	7.11442	7.12503	7.13319	7.21047	7.21074	7.3302	7.3585	7.38381	7.45374	7.53075	7.53157	7.57429	7.59034	7.61728	7.62191	8.1577	8.15797	8.16151	8.16614
156	2.09691	2.10943	2.1097	2.16521	3.03108	3.18047	3.18183	3.18373	3.74565	4.37913	4.38593	4.38647	4.4662	5.09207	6.64964	6.64964	6.66189	6.85781	6.89428	6.89428	6.93101	6.93155	6.97047	6.97156	6.98298	7.00856	7.01999	7.05455	7.06244	7.07741	7.13428	7.137	7.1585	7.17564	7.17591	7.33456	7.37918	7.39877	7.47061	7.5264	7.53265	7.55361	7.6347	7.64259	7.64912	8.1362	8.1362	8.14573	8.14573
158	2.16358	2.16956	2.16984	2.28222	3.0787	3.13584	3.13747	3.14591	3.70347	4.26702	4.27001	4.27055	4.43518	4.98104	6.44937	6.73182	6.73182	6.7438	6.86244	6.86244	6.90897	6.90897	6.96067	6.96285	7.0121	7.02353	7.02462	7.03251	7.05047	7.07605	7.14299	7.14326	7.17156	7.17346	7.20013	7.33537	7.39279	7.4151	7.46082	7.50762	7.50816	7.53238	7.60313	7.60585	7.62164	8.10056	8.10083	8.14491	8.14518
160	2.22861	2.23269	2.23269	2.4014	3.0855	3.09638	3.09829	3.15598	3.66755	4.15627	4.1579	4.15844	4.41069	4.87247	6.22705	6.80529	6.80529	6.81781	6.83495	6.83495	6.88149	6.88149	6.93836	6.94053	7.00475	7.01999	7.0687	7.06979	7.08258	7.11115	7.11496	7.12612	7.22054	7.22244	7.2551	7.35197	7.40558	7.43007	7.44503	7.4834	7.49157	7.51306	7.58245	7.58327	7.60422	8.07198	8.07226	8.14028	8.14056
162	2.29501	2.298	2.29827	2.52113	3.05529	3.06019	3.06264	3.20931	3.63762	4.04715	4.04824	4.04878	4.38566	4.7658	6.05236	6.80366	6.80366	6.84938	6.84965	6.87196	6.8823	6.88285	6.91387	6.92965	6.9819	6.99713	7.08203	7.08258	7.11169	7.11224	7.15169	7.15823	7.27197	7.27442	7.3166	7.36993	7.42109	7.42544	7.43959	7.46299	7.47197	7.49864	7.5683	7.57347	7.59497	8.04641	8.04668	8.13974	8.14028
164	2.36331	2.36603	2.3663	2.6395	3.02427	3.02781	3.03108	3.26972	3.61367	3.93994	3.94075	3.94157	4.35899	4.66158	5.89262	6.77972	6.77972	6.82734	6.82761	6.87142	6.88911	6.92285	6.92856	6.96829	6.97945	6.98897	7.06081	7.06108	7.14462	7.14489	7.18897	7.21319	7.30544	7.31306	7.37075	7.37156	7.41401	7.43497	7.44449	7.45265	7.45864	7.50299	7.56449	7.57129	7.59334	8.02382	8.02409	8.14518	8.146
166	2.43406	2.43651	2.43678	2.75406	2.99597	2.99897	3.00441	3.33312	3.59653	3.83463	3.83572	3.83708	4.32906	4.55927	5.74459	6.75822	6.75822	6.80611	6.80638	6.854	6.86706	6.91795	6.93074	7.01128	7.01509	7.02054	7.04557	7.04557	7.18108	7.18136	7.22027	7.26762	7.30571	7.32068	7.35877	7.39034	7.40939	7.43714	7.45429	7.46272	7.47252	7.52367	7.57619	7.57919	7.59959	8.00396	8.00423	8.15607	8.15688
168	2.50671	2.50889	2.50943	2.85937	2.97094	2.97393	2.98482	3.39925	3.58728	3.73177	3.7334	3.73612	4.29151	4.4594	5.61208	6.73944	6.73944	6.78761	6.78761	6.83659	6.84856	6.90298	6.91713	7.01482	7.01509	7.06353	7.06979	7.07006	7.21374	7.21401	7.25347	7.29782	7.30435	7.32041	7.33973	7.37292	7.39143	7.41864	7.48367	7.48857	7.50871	7.55007	7.59442	7.59742	7.61266	7.98708	7.98736	8.16913	8.16994
170	2.58127	2.58345	2.58399	2.92658	2.94971	2.95298	2.99788	3.46646	3.58075	3.63163	3.63571	3.64687	4.23545	4.36171	5.50677	6.72366	6.72366	6.77182	6.7721	6.82162	6.83359	6.88883	6.9038	7.00094	7.00122	7.10217	7.10734	7.10761	7.23469	7.23496	7.28503	7.29319	7.30789	7.3253	7.3351	7.35306	7.37619	7.41211	7.50544	7.50871	7.54191	7.57701	7.61238	7.62164	7.63116	7.97375	7.97402	8.1762	8.17675
175	2.76713	2.77093	2.77257	2.91325	2.91488	2.91842	3.18509	3.3938	3.39408	3.40115	3.65013	3.66292	4.04905	4.12715	5.33479	6.69645	6.69645	6.74516	6.74516	6.79604	6.80665	6.86325	6.87876	6.97482	6.97482	7.17782	7.18299	7.18326	7.27115	7.28612	7.28666	7.28694	7.31034	7.32857	7.34163	7.3449	7.36394	7.42299	7.56313	7.56422	7.58191	7.62626	7.66681	7.67062	7.6747	7.95117	7.95171	8.12505	8.12641
180	2.86672	2.87651	2.88903	2.89828	2.91543	2.91624	3.22101	3.25883	3.25911	3.27625	3.81612	3.82891	3.87354	3.9432	5.25778	6.68556	6.68556	6.73454	6.73454	6.78652	6.7955	6.85319	6.8687	6.96394	6.96421	7.19605	7.20367	7.20367	7.24721	7.26598	7.29646	7.30598	7.30979	7.31741	7.33483	7.34217	7.37864	7.43034	7.58626	7.58653	7.5868	7.64232	7.68341	7.68395	7.68885	7.9294	7.92994	8.11335	8.11498
[truncated: 1 more columns]
